# Supplementary material for: Estimating Dengue Transmission Intensity from Case-Notification Data from Multiple Countries
Source: PubMed Central journal article supplement (PMC4939939; doi:10.1371/journal.pntd.0004833), 2016-07-11
Supplement: pntd.0004833.s001.pdf [file pntd.0004833.s001.pdf]

# Estimating dengue transmission intensity from case-notification data from multiple countries – Supporting Information

**Authors:** Natsuko Imai<sup>1</sup>, Ilaria Dorigatti<sup>1</sup>, Simon Cauchemez<sup>2</sup>, Neil M. Ferguson<sup>1</sup>

**Affiliations:** **1.** MRC Centre for Outbreak Analysis and Modelling, Department of Infectious Disease Epidemiology, Imperial College London, United Kingdom. **2.** Mathematical Modelling of Infectious Diseases Unit, Institut Pasteur, Paris, France.

|     |                                                                                 |    |
|-----|---------------------------------------------------------------------------------|----|
| 1   | Methods .....                                                                   | 2  |
| 1.1 | Incidence Model.....                                                            | 2  |
| 1.2 | Calculating the Basic Reproduction Number ( $R_0$ ) .....                       | 7  |
| 1.3 | Additional seroprevalence datasets and force of infection estimates.....        | 10 |
| 1.4 | Weighted regression to compare estimates from seroprevalence and incidence data | 11 |
| 2   | Results .....                                                                   | 13 |
| 2.1 | Parameter Estimates .....                                                       | 13 |
| 2.2 | DIC Comparison .....                                                            | 38 |
| 2.3 | Comparison of estimates obtained from seroprevalence and incidence data. ....   | 41 |
| 2.4 | Model Fits by country.....                                                      | 43 |
| 3   | References .....                                                                | 61 |

## 1 Methods

In the main text, only results from model 1B (cumulative incidence data) as described below are presented for clarity and to keep the paper concise.

### 1.1 Incidence Model

We consider a population stratified into  $M$  (where  $M$  varies by study) age groups and denote  $a_j$  and  $a_{j+1}$  the lower and upper age bounds respectively of age group  $j$  ( $j=0, \dots, M-1$ ). Assuming life-long homologous protection after infection with any serotype, the number of infections an individual can acquire is finite (up to four). If fewer than four serotypes have circulated in any one area, then the number of infections an individual can have will change accordingly. Where four serotypes are known to be in circulation, and assuming a constant force of infection,  $\lambda$ , which is the same for all four serotypes, the incidence of primary infections caused by any one serotype in age group  $j$ ,  $I_1(j)$  is given by:

$$\begin{aligned} I_1(j) &= \int_{a_j}^{a_{j+1}} 4\lambda (e^{-\lambda a})^4 da \\ &= \int_{a_j}^{a_{j+1}} 4\lambda e^{-4\lambda a} da = (e^{-4\lambda a_j} - e^{-4\lambda a_{j+1}}) \end{aligned} \quad (1.1)$$

The incidence of secondary infections in age group  $j$ ,  $I_2(j)$  is given by:

$$\begin{aligned} I_2(j) &= 4 \int_{a_j}^{a_{j+1}} 3\lambda (1 - e^{-\lambda a}) (e^{-\lambda a})^3 da \\ &= 4 \left[ e^{-3\lambda a_j} - e^{-3\lambda a_{j+1}} \right] - 3 \left[ e^{-4\lambda a_j} - e^{-4\lambda a_{j+1}} \right] \end{aligned} \quad (1.2)$$

The incidence of tertiary infections in an age group  $j$ ,  $I_3(j)$  is given by:

$$\begin{aligned} I_3(j) &= 4 \int_{a_j}^{a_{j+1}} 3\lambda (1 - e^{-\lambda a})^2 (e^{-\lambda a})^2 da \\ &= 4 \int_{a_j}^{a_{j+1}} 3\lambda (e^{-2\lambda a} - 2e^{-3\lambda a} + e^{-4\lambda a}) da \\ &= 12\lambda \left( \left[ -\frac{e^{-2\lambda a}}{2\lambda} \right]_{a_j}^{a_{j+1}} - \left[ -\frac{2e^{-3\lambda a}}{3\lambda} \right]_{a_j}^{a_{j+1}} + \left[ -\frac{e^{-4\lambda a}}{4\lambda} \right]_{a_j}^{a_{j+1}} \right) \\ &= 6 \left[ e^{-2\lambda a_j} - e^{-2\lambda a_{j+1}} \right] + 8 \left[ e^{-3\lambda a_{j+1}} - e^{-3\lambda a_j} \right] + 3 \left[ e^{-4\lambda a_j} - e^{-4\lambda a_{j+1}} \right] \end{aligned} \quad (1.3)$$

Finally, the incidence of quaternary infections in an age group  $j$ ,  $I_4(j)$  is given by:

$$\begin{aligned}
I_4(j) &= 4 \int_{a_j}^{a_{j+1}} \lambda (1 - e^{-\lambda a})^3 e^{-\lambda a} da \\
&= 4 \lambda \int_{a_j}^{a_{j+1}} (e^{-\lambda a} - 3e^{-2\lambda a} + 3e^{-3\lambda a} - e^{-4\lambda a}) da \\
&= 4 \lambda \left[ \left[ \frac{-e^{-\lambda a}}{\lambda} \right]_{a_j}^{a_{j+1}} - \left[ -\frac{3e^{-2\lambda a}}{2\lambda} \right]_{a_j}^{a_{j+1}} + \left[ -\frac{3e^{-3\lambda a}}{3\lambda} \right]_{a_j}^{a_{j+1}} - \left[ -\frac{e^{-4\lambda a}}{4\lambda} \right]_{a_j}^{a_{j+1}} \right] \\
&= 4 \left[ e^{-\lambda a_j} - e^{-\lambda a_{j+1}} + e^{-3\lambda a_j} - e^{-3\lambda a_{j+1}} \right] + 6 \left[ e^{-2\lambda a_{j+1}} - e^{-2\lambda a_j} \right] + \left[ e^{-4\lambda a_{j+1}} - e^{-4\lambda a_j} \right]
\end{aligned} \tag{1.4}$$

The total dengue infection incidence in an age group  $j$ ,  $T(j) = I_1 + I_2 + I_3 + I_4$  is, as expected:

$$\begin{aligned}
T(j) &= \int_{a_j}^{a_{j+1}} \left[ 4\lambda (e^{-\lambda a})^4 + 12\lambda (1 - e^{-\lambda a}) (e^{-\lambda a})^3 + 12\lambda (1 - e^{-\lambda a})^2 (e^{-\lambda a})^2 + 4\lambda (1 - e^{-\lambda a})^3 (e^{-\lambda a}) \right] da \\
&= 4 \int_{a_j}^{a_{j+1}} \lambda e^{-\lambda a} (e^{-\lambda a} + [1 - e^{-\lambda a}])^3 da \\
&= \int_{a_j}^{a_{j+1}} 4\lambda e^{-\lambda a} da \\
&= 4e^{-\lambda a_j} - 4e^{-\lambda a_{j+1}}
\end{aligned}$$

Ideally, we would allow forces of infection to vary by serotype (DENV-1 to DENV-4). However as serotype-specific data were not available, we assumed circulating serotypes were equally transmissible.

### Model 1A and 1B: assuming a single reporting rate across all ages

The average annual incidence rate per person in an age group,  $D(j)$ , then becomes the weighted sum of the primary to quaternary infection rates:

$$D(j) = \frac{1}{w(j)} \left\{ \rho [I_2(j) + \gamma_1 I_1(j) + \gamma_3 (I_3(j) + I_4(j))] + B \right\} \tag{1.5}$$

where  $w(j) = a_{j+1} - a_j$  is the width of the age group  $j$ ,  $\rho$  (baseline reporting rate) is the probability that a secondary infection results in a detected dengue case,  $\gamma_1$  is the probability that a primary infection is detected relative to a secondary infection, and  $\gamma_3$  is the probability that a tertiary or quaternary infection is detected relative to a primary infection. Here  $B$  is the baseline risk of infection used to represent any non-dengue related illnesses that are misdiagnosed as dengue (only estimated when cases have not been laboratory confirmed). Since we assumed that most symptomatic cases were secondary infections and that the majority of primary infections were asymptomatic, we estimated the probability of detecting a

primary infection relative to a secondary case and the probability of detecting a tertiary or quaternary infection relative to a primary case ( $\rho > \gamma_1 > \gamma_3$ ). For model 1 we assumed a single baseline reporting rate ( $\rho$ ) across all age groups and estimated four (or five) parameters:  $\lambda$ ,  $\rho$ ,  $\gamma_1$ ,  $\gamma_3$ , (and B). Where multiple years of incidence data were available from the same survey we fitted each model variant to individual years (model 1A), and to the cumulative incidence (model 1B). When fitting to the cumulative incidence e.g. cumulative incidence over ten years, we multiplied the estimated annual disease incidence by 10 to take into account the survey period.

### Models 2A and 2B: Assuming age-dependent reporting rates

Dengue reporting rates are likely to differ by age. In general, reporting rates may be higher in children, especially in South East Asia where dengue is generally a paediatric infection [1]. In the Americas where dengue is predominantly an adult disease, reporting rates may be higher in older children or adults. Therefore we allowed the baseline reporting rate  $\rho$  to differ depending on whether an individual was aged above or below a threshold age:

$$\begin{aligned} \rho &= \rho_{young}, \text{ if } a < a_{threshold} \\ &= \rho_{old}, \text{ if } a \geq a_{threshold} \end{aligned}$$

and estimated the value of  $a_{threshold}$  for models 2A and 2B.

For model 2 we estimated six (or seven) parameters:  $\lambda$ ,  $\rho_{young}$ ,  $\rho_{old}$ ,  $\gamma_1$ ,  $\gamma_3$ , and  $a_{threshold}$ , (and B). Where multiple years of incidence data were available from the same survey we fitted each model variant to individual years (model 2A), and to the cumulative incidence (model 2B). When fitting to the cumulative incidence e.g. cumulative incidence over ten years, we multiplied the estimated annual disease incidence by 10 to take into account the survey period.

### Priors

For all model variants (models 1A, 1B, 2A, and 2B) all parameters have uninformative uniform priors (Uniform([0,1])). For the age threshold the upper bound of the uniform distribution is the upper age bound of the oldest age group.

### Likelihood

The expected number of cases per year in age-group  $j$ , ( $C_j$ ) is:

$$C_j = n(j)D(j) \tag{1.6}$$

where  $n(j)$  is the population size of age group  $j$ . Where population numbers were not available from the dataset, the population age-structure closest to the survey population was used (taken from census data or from United Nations estimates) [2].

We assumed that the number of cases reported in each age-group are Dirichlet-multinomially (DMN) distributed, as we expected the overall distribution of cases would be more overdispersed than what we would expect from a multinomial distribution [3]. The log-likelihood is given by:

$$\ln \ell_j = -(\ln \Gamma(1/\psi + N) - \ln \Gamma(1/\psi)) + \sum_{j=1}^I \left( \ln \Gamma\left(\frac{1}{(\psi/p_j)} + y_j\right) - \ln \Gamma\left(\frac{1}{(\psi/p_j)}\right) \right)$$

where  $\psi$  is the over-dispersion parameter characterising how different a DMN distribution is from the corresponding multinomial distribution (MN) with the same category probabilities (the larger the  $\psi$ , the greater the difference) and  $y_j$  is the observed number of cases in age class  $j$ . The probabilities ( $p_j$ ) are then calculated as the expected proportion of cases in one age group relative to the total number of cases across all age groups.

$$p_j = \frac{C_j}{\sum_j C_j}$$

We then assumed that the total number of cases across all ages ( $N$ ) was Poisson distributed:

$$P(\mu = N) = \frac{\mu^N e^{-\mu}}{N!} \text{ where } \mu \text{ is the total expected number of cases across all age groups } (\sum_j C_j).$$

The full log-likelihood is then:

$$\ln \ell_j = -(\ln \Gamma(1/\psi + N) - \ln \Gamma(1/\psi)) + \sum_{j=1}^I \left( \ln \Gamma\left(\frac{1}{(\psi/p_j)} + y_j\right) - \ln \Gamma\left(\frac{1}{(\psi/p_j)}\right) \right) + N \ln(\mu) - \mu - \ln(N!)$$

## Expected incidence when there are fewer than four serotypes in circulation

When there are fewer than four serotypes in circulation, the maximum number of infections an individual can acquire also changes accordingly. Assuming an equal force of infection for all serotypes in circulation, the incidences are given by:

### 1) One serotype in circulation

With only one serotype in circulation, individuals will only be infected once in their lifetime. Thus the incidence of primary infection in age group  $j$  (with lower age bound  $a_j$  and upper age bound  $a_{j+1}$ )  $I_1(j)$  is given by:

$$\begin{aligned} I_1(j) &= \int_{a_j}^{a_{j+1}} \lambda(e^{-\lambda a}) da \\ &= e^{-\lambda a_j} - e^{-\lambda a_{j+1}} \end{aligned}$$

The incidence of disease in age group  $j$  is then given by:

$$D(j) = \frac{1}{w(j)} \{ \rho [I_1(j) + B] \}.$$

### 2) Two serotypes in circulation

With two serotypes in circulation, individuals can have up to two infections in their lifetime.

The incidence of primary infection in age group  $j$  (with lower age bound  $a_j$  and upper age bound  $a_{j+1}$ )  $I_1(j)$  is given by:

$$\begin{aligned} I_1(j) &= 2 \int_{a_j}^{a_{j+1}} \lambda(e^{-\lambda a})^2 da \\ &= (e^{-2\lambda a_j} - e^{-2\lambda a_{j+1}}) \end{aligned}$$

and the incidence of secondary infection in age group  $j$ ,  $I_2(j)$  is given by:

$$\begin{aligned} I_2(j) &= 2 \int_{a_j}^{a_{j+1}} \lambda [1 - e^{-\lambda a}] (e^{-\lambda a}) da \\ &= 2\lambda \left[ \frac{e^{-\lambda a_j}}{\lambda} - \frac{e^{-\lambda a_{j+1}}}{\lambda} + \frac{e^{-2\lambda a_{j+1}}}{2\lambda} - \frac{e^{-2\lambda a_j}}{2\lambda} \right] \\ &= 2 \left[ e^{-\lambda a_j} - e^{-\lambda a_{j+1}} \right] - \left[ e^{-2\lambda a_j} - e^{-2\lambda a_{j+1}} \right] \end{aligned}$$

The incidence of disease in age group  $j$  is then given by:

$$D(j) = \frac{1}{w(j)} \{ \rho [I_2(j) + \gamma_1 I_1(j) + B] \}.$$

### 3) Three serotypes in circulation

With three serotypes in circulation, individuals can have a maximum of 3 infections.

The incidence of primary infection in age group  $j$  (with lower age bound  $a_j$  and upper age bound  $a_{j+1}$ )  $I_1(j)$  is given by:

$$\begin{aligned} I_1(j) &= 3 \int_{a_j}^{a_{j+1}} \lambda (e^{-\lambda a})^3 da \\ &= (e^{-3\lambda a_j} - e^{-3\lambda a_{j+1}}) \end{aligned}$$

The incidence of secondary infection in age group  $j$ ,  $I_2(j)$  is given by:

$$\begin{aligned} I_2(j) &= 3 \int_{a_j}^{a_{j+1}} 2\lambda [1 - e^{-\lambda a}] (e^{-\lambda a})^2 da \\ &= 6\lambda \left[ \frac{e^{-2\lambda a_j}}{2\lambda} - \frac{e^{-2\lambda a_{j+1}}}{2\lambda} + \frac{e^{-3\lambda a_{j+1}}}{3\lambda} - \frac{e^{-3\lambda a_j}}{3\lambda} \right] \\ &= 3 \left[ e^{-2\lambda a_j} - e^{-2\lambda a_{j+1}} \right] - 2 \left[ e^{-3\lambda a_j} - e^{-3\lambda a_{j+1}} \right] \end{aligned}$$

and the incidence of tertiary infection in age group  $j$ ,  $I_3(j)$  is given by:

$$\begin{aligned} I_3(j) &= 3 \int_{a_j}^{a_{j+1}} \lambda [1 - e^{-\lambda a}]^2 (e^{-\lambda a}) da \\ &= 3\lambda \left[ \frac{e^{-\lambda a_j}}{\lambda} - \frac{e^{-\lambda a_{j+1}}}{\lambda} + \frac{2e^{-2\lambda a_{j+1}}}{2\lambda} - \frac{2e^{-2\lambda a_j}}{2\lambda} + \frac{e^{-3\lambda a_j}}{3\lambda} - \frac{e^{-3\lambda a_{j+1}}}{3\lambda} \right] \\ &= 3 \left[ e^{-\lambda a_j} - e^{-\lambda a_{j+1}} \right] - 3 \left[ e^{-2\lambda a_j} - e^{-2\lambda a_{j+1}} \right] + \left[ e^{-3\lambda a_j} - e^{-3\lambda a_{j+1}} \right] \end{aligned}$$

The incidence of disease in age group  $j$  is then given by:

$$D(j) = \frac{1}{w(j)} \{ \rho [I_2(j) + \gamma_1 (I_1(j) + I_3(j)) + B] \} .$$

## 1.2 Calculating the Basic Reproduction Number ( $R_0$ )

We assumed dengue was at endemic equilibrium and that the force of infection ( $\lambda$ ) was constant in time. We additionally assumed that all serotypes in circulation were equally transmissible. We calculated the serotype-specific basic reproduction number under the following two assumptions to match previous estimates from seroprevalence data, as described in Imai *et al* [4].

**Assumption 1** – individuals can be infected four times, there is no cross-immunity between serotypes. The basic reproduction number for serotype  $i$  is given by [5]:

$$R_0 = \frac{1}{1 - \int_0^{\infty} f(j) z_i(a) da}$$

where  $f(a)$  is the proportion of the population aged  $a$ .  $z_i(a)$  is the proportion of population aged  $a$  seropositive to serotype  $i$  and is given by:

$$z_i(a) = 1 - e^{-\frac{\lambda a}{n}}$$

where  $n$  is the number of serotypes in circulation.

Integrating between  $a_j$  and  $a_{j+1}$ :

$$\begin{aligned} R_0 &= \frac{1}{1 - \int_{a_j}^{a_{j+1}} f(a) \left[ 1 - e^{-\frac{\lambda a}{n}} \right] da} \\ &= \frac{1}{1 - \int_{a_j}^{a_{j+1}} \left[ f(a) + f(a) e^{-\frac{\lambda a}{n}} \right] da} \\ &= \frac{1}{1 - \int_{a_j}^{a_{j+1}} f(a) da + \int_{a_j}^{a_{j+1}} f(a) e^{-\frac{\lambda a}{n}} da} \end{aligned}$$

$\int_{a_j}^{a_{j+1}} f(a) da = 1$  so we are left with:

$$\begin{aligned} R_0 &= \frac{1}{\int_{a_j}^{a_{j+1}} f(a) e^{-\frac{\lambda a}{n}} da} \\ &= \frac{1}{\sum_j \frac{f(a_{j+1} \rightarrow a_j)}{a_{j+1} - a_j} \left[ -\frac{n \exp[-\lambda a / n]}{\lambda} \right]_{a_j}^{a_{j+1}}} \\ &= \frac{1}{\sum_j \frac{f(a_{j+1} \rightarrow a_j)}{a_{j+1} - a_j} \frac{n}{\lambda} \left[ \exp[-\lambda a_j / n] - \exp[-\lambda a_{j+1} / n] \right]} \\ &= \frac{\lambda}{\sum_j \frac{f(a_{j+1} \rightarrow a_j)}{a_{j+1} - a_j} n \left[ \exp[-\lambda a_j / n] - \exp[-\lambda a_{j+1} / n] \right]} \end{aligned}$$

**Assumption 2** – Complete immunity after secondary infection.

If only primary and secondary infections can occur, we can relax the assumption of no cross-immunity between serotypes. The basic reproduction number (same for any serotype) is given by:



$$R_0 = \frac{1}{\int_0^{\infty} f(a)[x(a) + (n-1)z(a)]da}$$

where  $f(a)$  is the proportion of the population aged  $a$ ,  $n$  is the number of serotypes in circulation,  $x(a)$  is the proportion of the population seronegative at age  $a$  calculated by:  $x(a) = \exp[-\lambda a]$ , and  $z_i(a)$  is the proportion of the population seropositive for serotype  $i$  at age  $a$  calculated by:

$$\begin{aligned} z_i(a) &= [1 - \exp[-\lambda a / n]] [\exp[-(n-1)\lambda a / n]] \\ &= \exp[-(n-1)\lambda a / n] - \exp[-n\lambda a / n] \\ &= \exp[-(n-1)\lambda a / n] - \exp[-\lambda a] \end{aligned}$$

Integrating between ages  $a_j$  and  $a_{j+1}$ :

$$\begin{aligned} R_0 &= \frac{1}{\int_{a_j}^{a_{j+1}} f(a)[x(a) + (n-1)z(a)]da} \\ &= \frac{1}{\int_{a_j}^{a_{j+1}} f(a)[(n-1)\exp[-(n-1)\lambda a / n] - (n-2)\exp[-\lambda a]]da} \\ &= \frac{1}{\sum_j \frac{f(a_{j+1} \rightarrow a_j)}{a_{j+1} - a_j} \left[ \frac{n(\exp[-(n-1)\lambda a_j / n] - \exp[-(n-1)\lambda a_{j+1} / n])}{\lambda} - (n-2) \left( \frac{\exp[-\lambda a_j] - \exp[-\lambda a_{j+1}]}{\lambda} \right) \right]} \\ &= \frac{1}{\sum_j \frac{p(a_{j+1} \rightarrow a_j)}{a_{j+1} - a_j} [n(\exp[-(n-1)\lambda a_j / n] - \exp[-(n-1)\lambda a_{j+1} / n]) - (n-2)(\exp[-\lambda a_j] - \exp[-\lambda a_{j+1}])]} \end{aligned}$$

### 1.3 Additional seroprevalence datasets and force of infection estimates

In addition to the force of infection estimates calculated from the seroprevalence datasets described in Imai *et al.* [4], we estimated  $\lambda$  using model A (as described in [4]) from four additional datasets from Brazil and Taiwan (Table S1). Model fits are shown in Fig. S1.

**Table S1: Parameter estimates from extra seroprevalence datasets**

| Country | Author         | Region                                                      | Urban/Rural | $\lambda$ force of infection<br>(95% CrI) | $\gamma$ over-dispersion*<br>(95% CrI) | $R_0$                     |                           | Ref |
|---------|----------------|-------------------------------------------------------------|-------------|-------------------------------------------|----------------------------------------|---------------------------|---------------------------|-----|
|         |                |                                                             |             |                                           |                                        | Assumption 1<br>(95% CrI) | Assumption 2<br>(95% CrI) |     |
| Brazil  | Fernando       | Paco do Lumiar<br>Sao Jose de Ribamar<br>Estado do Maranhao | Urban       | 0·013<br>(0·011-0·021)                    | 0·070<br>(0·044-0·270)                 | 1·09<br>(1·08-1·15)       | 1·12<br>(1·10-1·21)       | [6] |
| Brazil  | da Silva-Nunes | Amazon                                                      | Rural       | 0·008<br>(0·007-0·017)                    | 0·026<br>(0·009-0·319)                 | 1·05<br>(1·05-1·12)       | 1·06<br>(1·05-1·16)       | [7] |
| Brazil  | Lima           | Campinas                                                    | Urban       | 0·007<br>(0·006-0·016)                    | 0·111<br>(0·079-0·319)                 | 1·05<br>(1·04-1·11)       | 1·06<br>(1·05-1·15)       | [8] |
| Taiwan  | Shu            | Liuchiu Hsiang                                              | Urban       | 0·026<br>(0·023-0·037)                    | 0·157<br>(0·112-0·380)                 | 1·24<br>(1·21-1·34)       | 1·38<br>(1·32-1·60)       | [9] |

\*over-dispersion parameter representing heterogeneity in the seroprevalence with age-group.

**Fig. S1: Model fits from non-serotype specific model A (as described previously [4]) fitted to the extra seroprevalence datasets described in Table S1. 95% exact confidence intervals around data points, posterior median (line) and 95% credible interval (shaded area) shown.**

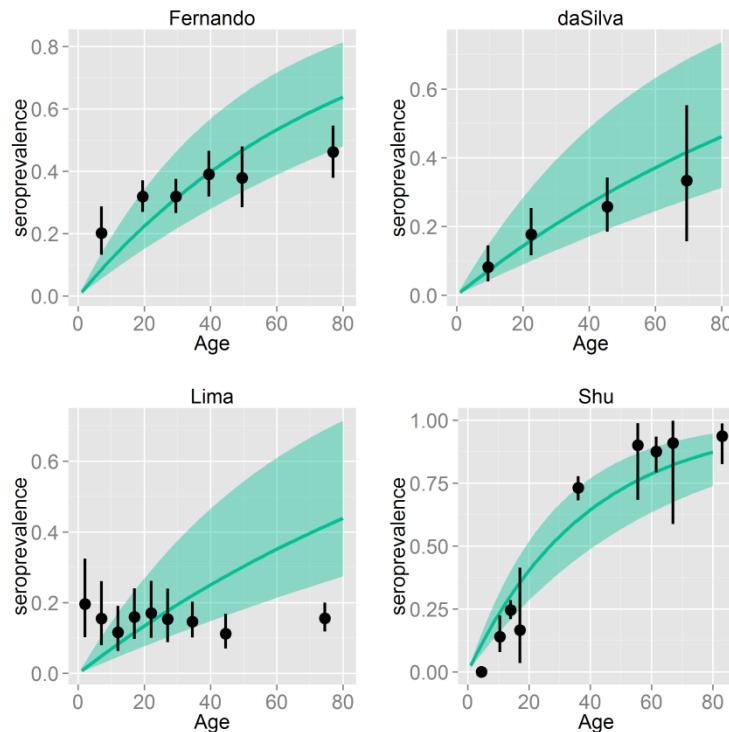

#### 1.4 Weighted regression to compare estimates from seroprevalence and incidence data

We used a linear regression to compare the force of infection estimates obtained from seroprevalence ( $\lambda_{sero}$ ) and incidence ( $\lambda_{inc}$ ) data using the method described by Ripley and Thompson [10], which explicitly accounts for measurement errors in both the x and y to estimate the MLE line. This was implemented using the *deming* package in R [11]. Since seroprevalence and incidence data collected in the same year and geographical location were not available, the serology datasets were matched to corresponding incidence datasets as closely as possible by country, region, and survey year (Table S2). Since seroprevalence data represent all past infections, we compared these estimates to those obtained from cumulative incidence data where possible.

Confidence intervals for the regression line were estimated using the jackknife estimate of the variance-covariance matrix between the estimated intercept and slope of the regression. The areas of the symbols on the plots (main text Fig. 4) are proportional to the point weights, which correspond to the reciprocal of the variance of the error term in the linear regression. The larger circles indicate greater weight, i.e. smaller error.

**Table S2: Matched serology and incidence datasets**

| Country   | Incidence Datasets |             |                     |               |      | Serology Datasets   |             |                                                         |      |
|-----------|--------------------|-------------|---------------------|---------------|------|---------------------|-------------|---------------------------------------------------------|------|
|           | Author             | Survey Year | Region              | Diagnosis     | Ref  | Author              | Survey Year | Region                                                  | Ref  |
| Brazil    | Penna              | 2001/06     | Amazon              | Clinical      | [12] | Silva-Nunez         | 2004        | Ramal do Granada (Acre State Amazon)                    | [13] |
| Brazil    | Cordeiro           | 2002/06     | Pernambuco (Recife) | Lab confirmed | [14] | Braga               | 2005/06     | Recife (NE)                                             | [15] |
| Brazil    | Cardoso            | 2000/09     | Vitoria (~Rio)      | Lab confirmed | [16] | Lima                | 1998        | Sao Paulo                                               | [17] |
| Brazil    | Cordeiro           | 1995/01     | Pernambuco (Recife) | Lab confirmed | [14] | Fernando            | 1996        | Paco do Lumiar, Sao Jose de Ribamar, Estado do Maranhao | [6]  |
| Laos      | Anker              | 2000/06     | National            | Clinical      | [18] | Vallee              | 2006        | Vientiane                                               | [19] |
| Nicaragua | Hammond            | 1999/01     | Leon                | Clinical/Lab  | [20] | Balmaseda           | 2001/06     | Managua                                                 | [21] |
| Singapore | Anker              | 1999/05     | National            | Clinical/Lab  | [18] | Yew                 | 2004        | National                                                | [22] |
| Singapore | Ler                | 2000/07     | National            | Lab confirmed | [23] | Yap                 | 2007        | National                                                | [24] |
| Taiwan    | Lin                | 2003/09     | Kaohsiung City      | Lab confirmed | [25] | Shu                 | 1997-1998   | Liuchiu Hsiang                                          | [9]  |
| Thailand  | Thai MoH*          | 2000        | Bangkok^            | Lab confirmed | [26] | Perret              | 2000        | Bangkok                                                 | [27] |
| Thailand  | Thai MoH*          | 2000        | Ratchaburi^         | Lab confirmed | [26] | Tuntaprasart        | 2000        | Ratchaburi                                              | [28] |
| Thailand  | Thai MoH*          | 2010        | Rayong              | Lab confirmed | [26] | Rodriguez-Barraquer | 2010        | Rayong                                                  | [29] |
| Vietnam   | Cuong              | 1998/09     | Hanoi               | Lab confirmed | [30] | Bartley             | 1996-1997   | Dong Thap                                               | [31] |

\*Although not cumulative incidence, these datasets were retained for analysis as they matched the corresponding seroprevalence surveys exactly by year and region. ^The two datasets reported DHF cases only; we therefore assumed all observed cases were due to secondary infections.

## 2 Results

### 2.1 Parameter Estimates

As expected, force of infection estimates varied widely between countries, with less variation seen within countries. Figures S2 and S3 show the distribution of the total force of infection ( $\lambda_{total}$ ) grouped by country (calculated by multiplying the serotype-specific force of infection by the number of serotypes in circulation) from models 1A (single reporting rate,  $\rho$ , fitted to yearly incidence data) and 2A (age-dependent reporting rate,  $\rho_y$  and  $\rho_o$ , fitted to yearly incidence data) respectively. Individual estimates are given in Table S3 and Table S4.

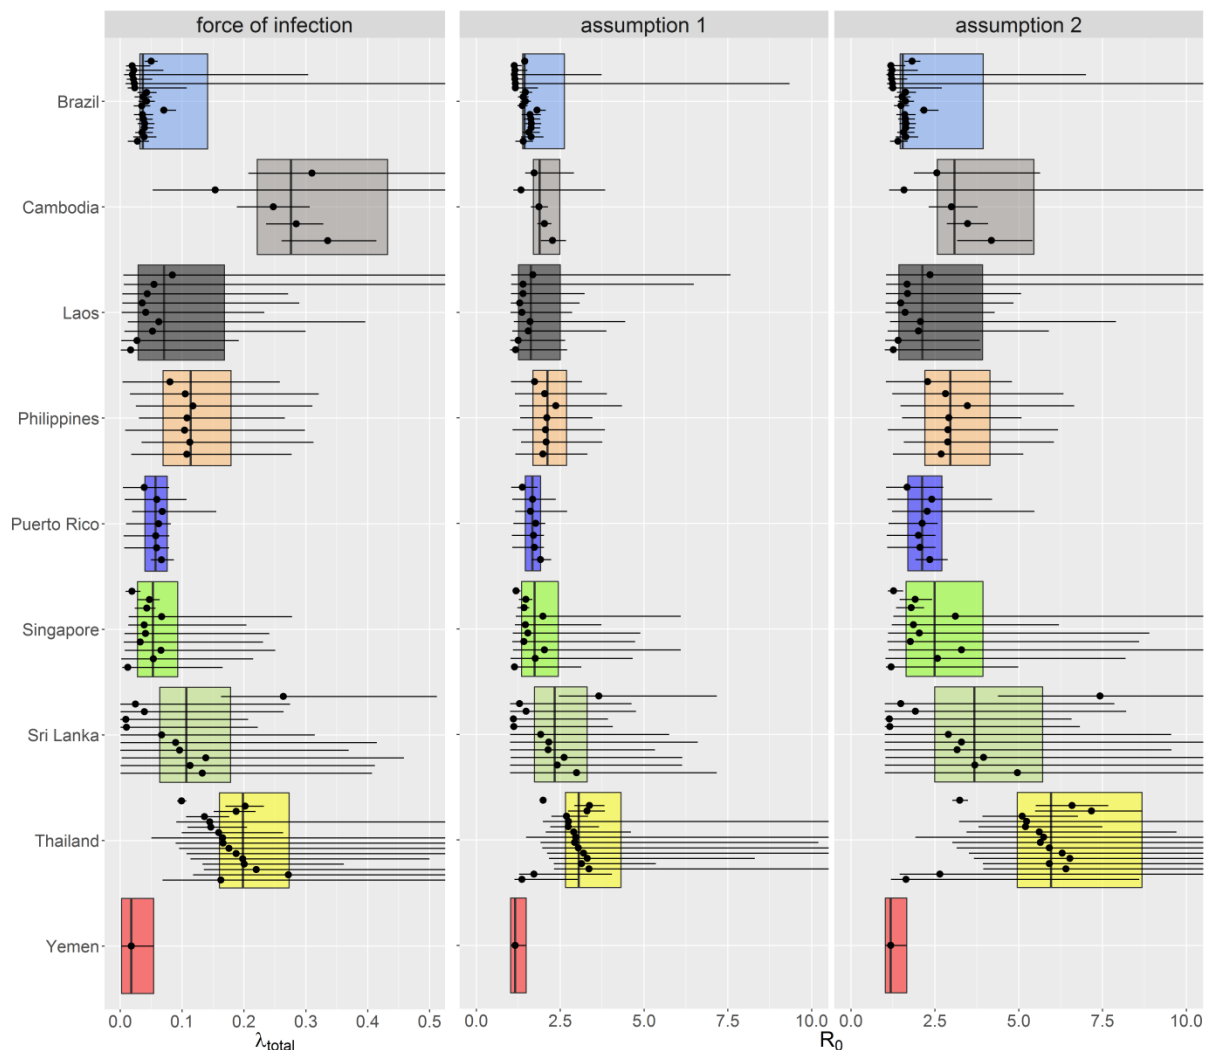

**Figure S2: Total force of infection and corresponding  $R_0$  estimates from model 1A (single reporting rate) and fitted to yearly incidence data grouped by country. Each point represents the posterior median estimate and the error bars the 95% CrI. The box represents the country-specific central estimate calculated by taking the mean values of the MCMC output for each country (the line and limits of the box represents the posterior median and the 95% CrI respectively).**

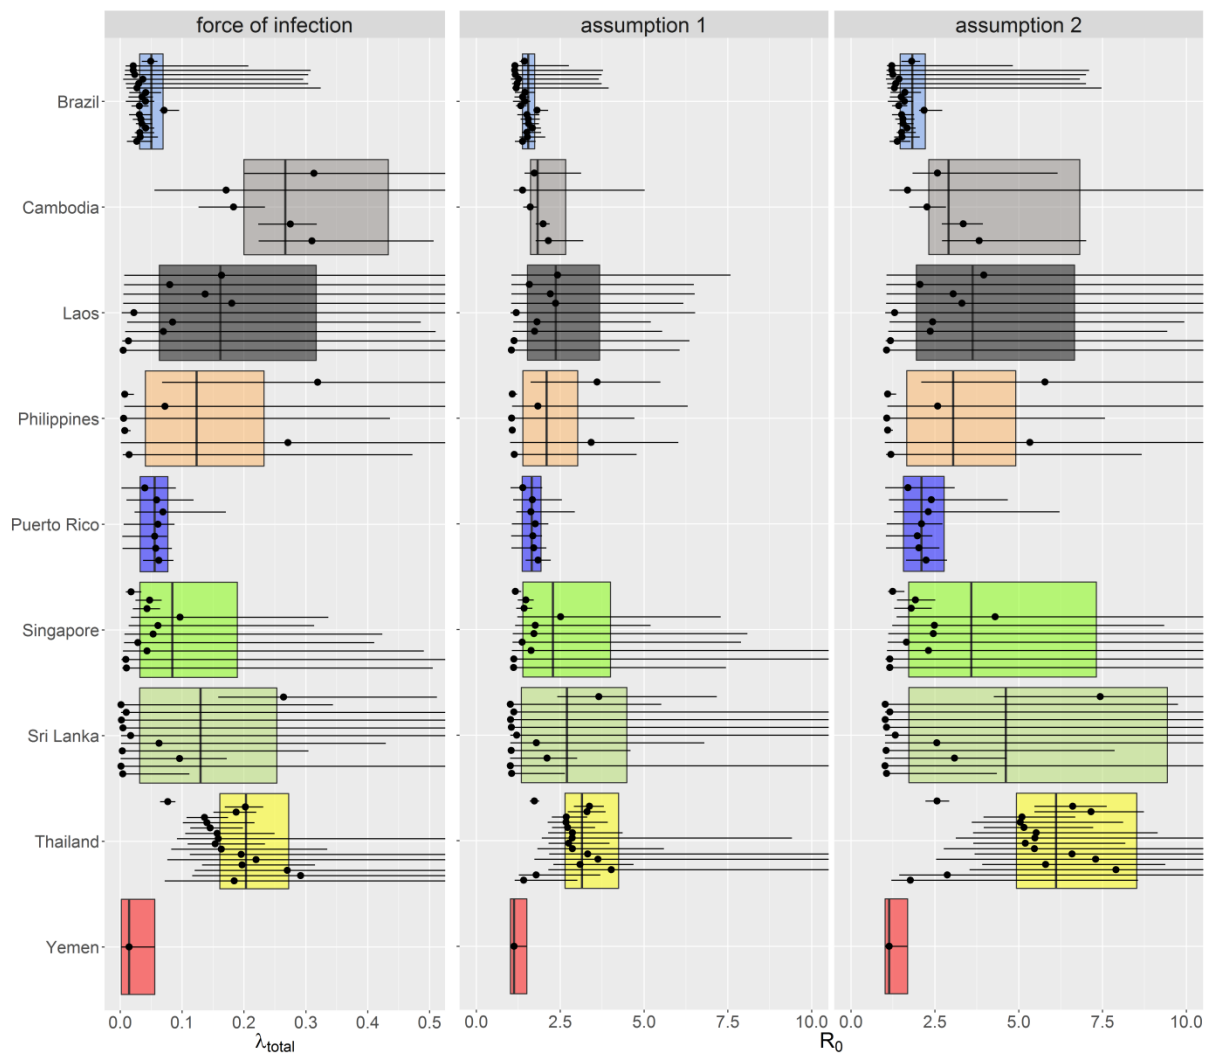

**Figure S3: Total force of infection and corresponding  $R_0$  estimates from model 2A (age-dependent reporting rate) and fitted to yearly incidence data grouped by country. Each point represents the posterior median estimate and the error bars the 95% CrI. The box represents the country-specific central estimate calculated by taking the mean values of the MCMC output for each country (the line and limits of the box represents the posterior median and the 95% CrI respectively).**

**Table S3: Summary parameter estimates from model 1 fitted to yearly incidence data (model 1A).**

| Author [Ref]  | Year       | Country                | $\lambda$ (95% CrI)    | $\rho$ (95% CrI)       | $\beta$ (95% CrI)      | $\psi$ (95% CrI)       | $\gamma_1$ (95% CrI)   | $\gamma_3$ (95% CrI)   | $\lambda_{tot}$ (95% CrI) | $R_0^*$ (95% CrI)      |                     | LnL                  |        |
|---------------|------------|------------------------|------------------------|------------------------|------------------------|------------------------|------------------------|------------------------|---------------------------|------------------------|---------------------|----------------------|--------|
|               |            |                        |                        |                        |                        |                        |                        |                        |                           | 1                      | 2                   |                      |        |
| Cordeiro [32] | 1995       | Brazil                 | 0.014<br>(0.006-0.023) | 0.263<br>(0.147-0.827) | NA                     | 0.012<br>(0.004-0.067) | 0.024<br>(0.003-0.058) | 0.550<br>(0.038-0.980) | 0.028<br>(0.012-0.046)    | 1.40<br>(1.17-1.69)    | 1.40<br>(1.17-1.69) | -17854               |        |
|               | 1996       |                        | 0.019<br>(0.011-0.030) | 0.388<br>(0.262-0.810) | NA                     | 0.010<br>(0.003-0.048) |                        |                        | 0.039<br>(0.021-0.059)    | 1.64<br>(1.33-2.01)    | 1.64<br>(1.33-2.01) | -40383               |        |
|               | 1997       |                        | 0.018<br>(0.012-0.026) | 0.614<br>(0.412-0.954) | NA                     | 0.009<br>(0.003-0.039) |                        |                        | 0.035<br>(0.024-0.053)    | 1.57<br>(1.38-1.89)    | 1.57<br>(1.38-1.89) | -57709               |        |
|               | 1998       |                        | 0.020<br>(0.017-0.027) | 0.882<br>(0.649-0.994) | NA                     | 0.005<br>(0.001-0.030) |                        |                        | 0.039<br>(0.034-0.054)    | 1.63<br>(1.54-1.90)    | 1.63<br>(1.54-1.90) | -93278               |        |
|               | 1999       |                        | 0.020<br>(0.014-0.028) | 0.574<br>(0.417-0.844) | NA                     | 0.005<br>(0.002-0.023) |                        |                        | 0.040<br>(0.028-0.055)    | 1.64<br>(1.44-1.92)    | 1.64<br>(1.44-1.92) | -64112               |        |
|               | 2000       |                        | 0.019<br>(0.013-0.026) | 0.458<br>(0.331-0.726) | NA                     | 0.006<br>(0.002-0.033) |                        |                        | 0.038<br>(0.025-0.053)    | 1.63<br>(1.40-1.91)    | 1.63<br>(1.40-1.91) | -50580               |        |
|               | 2001       |                        | 0.018<br>(0.011-0.027) | 0.289<br>(0.199-0.515) | NA                     | 0.002<br>(0.001-0.007) |                        |                        | 0.036<br>(0.022-0.053)    | 1.60<br>(1.36-1.93)    | 1.60<br>(1.36-1.93) | -31022               |        |
|               | 2002       |                        | 0.024<br>(0.022-0.030) | 0.963<br>(0.845-0.999) | NA                     | 0.042<br>(0.016-0.154) |                        |                        | 0.071<br>(0.065-0.090)    | 1.81<br>(1.73-2.07)    | 2.18<br>(2.07-2.61) | -209223              |        |
|               | 2003       |                        | 0.012<br>(0.007-0.016) | 0.380<br>(0.280-0.660) | NA                     | 0.008<br>(0.002-0.034) |                        |                        | 0.035<br>(0.022-0.049)    | 1.37<br>(1.23-1.53)    | 1.48<br>(1.28-1.73) | -47533               |        |
|               | 2004       |                        | 0.014<br>(0.010-0.019) | 0.075<br>(0.059-0.111) | NA                     | 0.005<br>(0.002-0.033) |                        |                        | 0.043<br>(0.030-0.056)    | 1.46<br>(1.31-1.63)    | 1.63<br>(1.40-1.88) | -11581               |        |
|               | 2005       |                        | 0.012<br>(0.008-0.017) | 0.173<br>(0.128-0.297) | NA                     | 0.007<br>(0.002-0.036) |                        |                        | 0.037<br>(0.023-0.051)    | 1.40<br>(1.24-1.56)    | 1.53<br>(1.30-1.78) | -23548               |        |
|               | 2006       |                        | 0.014<br>(0.009-0.020) | 0.213<br>(0.161-0.335) | NA                     | 0.009<br>(0.003-0.046) |                        |                        | 0.043<br>(0.028-0.059)    | 1.46<br>(1.29-1.66)    | 1.63<br>(1.37-1.94) | -34400               |        |
|               | Penna [12] |                        | 2001                   | 0.006<br>(0.003-0.027) | 0.437<br>(0.043-0.937) | 0.008<br>(0.001-0.620) |                        |                        | 0.024<br>(0.003-0.397)    | 0.024<br>(0.012-0.108) | 1.17<br>(1.08-1.84) | 1.25<br>(1.11-2.71)  | -14639 |
|               |            |                        | 2002                   | 0.006<br>(0.002-0.202) | 0.268<br>(0.022-0.851) | 0.009<br>(0.001-0.792) |                        |                        | 0.033<br>(0.002-0.510)    | 0.023<br>(0.009-0.808) | 1.16<br>(1.06-9.34) | 1.24<br>(1.08-18.84) | -9046  |
| 2003          |            | 0.005<br>(0.003-0.013) | 0.363<br>(0.107-0.859) | 0.006<br>(0.001-0.108) | 0.021<br>(0.003-0.269) | 0.022<br>(0.011-0.052) | 1.15<br>(1.07-1.38)    | 1.22<br>(1.09-1.68)    | -10371                    |                        |                     |                      |        |
| 2004          |            | 0.005<br>(0.002-0.076) | 0.199<br>(0.011-0.893) | 0.008<br>(0.001-0.940) | 0.047<br>(0.005-0.656) | 0.020<br>(0.006-0.304) | 1.14<br>(1.04-3.74)    | 1.20<br>(1.05-7.01)    | -5540                     |                        |                     |                      |        |

\*Assumption 1: individuals can be infected up to four times. Assumption 2: individuals are immune after two infections.

**Table S3 continued (2/5).**

| Author [Ref]  | Year                | Country  | $\lambda$ (95% CrI)    | $\rho$ (95% CrI)       | $B$ (95% CrI)          | $\psi$ (95% CrI)       | $\gamma_1$ (95% CrI)   | $\gamma_3$ (95% CrI)   | $\lambda_{tot}$ (95% CrI) | $R_0$ * (95% CrI)      |                        | LnL                 |                      |        |
|---------------|---------------------|----------|------------------------|------------------------|------------------------|------------------------|------------------------|------------------------|---------------------------|------------------------|------------------------|---------------------|----------------------|--------|
|               |                     |          |                        |                        |                        |                        |                        |                        |                           | 1                      | 2                      |                     |                      |        |
| Penna [12]    | 2005                | Brazil   | 0.006<br>(0.002-0.018) | 0.282<br>(0.044-0.883) | 0.008<br>(0.001-0.312) | 0.035<br>(0.004-0.349) | 0.024<br>(0.003-0.058) | 0.550<br>(0.038-0.980) | 0.022<br>(0.010-0.070)    | 1.15<br>(1.07-1.52)    | 1.23<br>(1.08-1.99)    | -8556               |                      |        |
|               | 2006                |          | 0.005<br>(0.002-0.012) | 0.315<br>(0.071-0.818) | 0.004<br>(0.001-0.117) | 0.014<br>(0.001-0.235) |                        |                        |                           | 0.019<br>(0.010-0.049) | 1.13<br>(1.07-1.35)    | 1.19<br>(1.08-1.62) | -7823                |        |
| Vong [33]     | 2006                | Cambodia | 0.084<br>(0.065-0.104) | 0.189<br>(0.164-0.200) | NA                     | 0.014<br>(0.007-0.030) | 0.128<br>(0.068-0.279) | 0.508<br>(0.030-0.977) | 0.335<br>(0.261-0.414)    | 2.27<br>(1.93-2.67)    | 4.19<br>(3.17-5.42)    | -20854              |                      |        |
|               | 2007                |          | 0.071<br>(0.059-0.082) | 0.960<br>(0.844-0.999) | NA                     | 0.006<br>(0.003-0.012) |                        |                        |                           | 0.285<br>(0.236-0.328) | 2.03<br>(1.82-2.24)    | 3.48<br>(2.86-4.09) | -110705              |        |
|               | 2008                |          | 0.062<br>(0.047-0.077) | 0.302<br>(0.263-0.327) | NA                     | 0.015<br>(0.008-0.030) |                        |                        |                           | 0.247<br>(0.188-0.307) | 1.87<br>(1.63-2.13)    | 3.00<br>(2.32-3.78) | -34280               |        |
| Wichmann [34] | 2006                |          | 0.038<br>(0.013-0.194) | 0.337<br>(0.186-0.946) | NA                     | 0.204<br>(0.008-0.944) |                        |                        | 0.154<br>(0.053-0.775)    | 1.32<br>(1.11-3.84)    | 1.58<br>(1.14-13.22)   | -31                 |                      |        |
|               | 2007                |          | 0.078<br>(0.052-0.172) | 0.897<br>(0.745-0.994) | NA                     | 0.129<br>(0.002-0.871) |                        |                        |                           | 0.310<br>(0.207-0.687) | 1.72<br>(1.46-2.91)    | 2.56<br>(1.87-5.64) | -543                 |        |
| Anker [18]    | 2000                | Laos     | 0.004<br>(0.000-0.042) | 0.045<br>(0.009-0.879) | NA                     | 0.174<br>(0.009-0.895) | 0.265<br>(0.062-0.705) | 0.589<br>(0.046-0.981) | 0.017<br>(0.001-0.168)    | 1.17<br>(1.01-2.71)    | 1.26<br>(1.01-3.87)    | -1051               |                      |        |
|               | 2001                |          | 0.007<br>(0.001-0.048) | 0.076<br>(0.019-0.906) | NA                     | 0.171<br>(0.006-0.912) |                        |                        |                           | 0.027<br>(0.002-0.192) | 1.25<br>(1.02-2.65)    | 1.41<br>(1.02-3.83) | -3630                |        |
|               | 2002                |          | 0.013<br>(0.002-0.075) | 0.132<br>(0.044-0.687) | NA                     | 0.212<br>(0.011-0.915) |                        |                        |                           | 0.052<br>(0.007-0.300) | 1.55<br>(1.07-3.88)    | 2.01<br>(1.09-5.90) | -8186                |        |
|               | 2003                |          | 0.016<br>(0.003-0.099) | 0.173<br>(0.060-0.622) | NA                     | 0.278<br>(0.028-0.934) |                        |                        |                           | 0.062<br>(0.012-0.396) | 1.60<br>(1.12-4.44)    | 2.07<br>(1.16-7.90) | -17292               |        |
|               | 2004                |          | 0.010<br>(0.001-0.058) | 0.049<br>(0.016-0.769) | NA                     | 0.140<br>(0.002-0.873) |                        |                        |                           | 0.041<br>(0.003-0.233) | 1.36<br>(1.02-2.86)    | 1.62<br>(1.03-4.29) | -3280                |        |
|               | 2005                |          | 0.009<br>(0.001-0.072) | 0.090<br>(0.023-0.854) | NA                     | 0.190<br>(0.013-0.894) |                        |                        |                           | 0.036<br>(0.004-0.289) | 1.29<br>(1.03-3.08)    | 1.49<br>(1.03-4.84) | -5243                |        |
|               | 2006                |          | 0.011<br>(0.001-0.068) | 0.085<br>(0.027-0.829) | NA                     | 0.201<br>(0.013-0.897) |                        |                        |                           | 0.044<br>(0.004-0.271) | 1.39<br>(1.03-3.23)    | 1.68<br>(1.04-5.08) | -5948                |        |
|               | Khampapongpane [38] |          | 2010                   | 0.014<br>(0.001-0.161) | 0.102<br>(0.024-0.473) | 0.124<br>(0.004-0.951) |                        |                        |                           | 0.080<br>(0.015-0.506) | 0.055<br>(0.006-0.644) | 1.39<br>(1.04-6.49) | 1.67<br>(1.05-12.46) | -33953 |
|               | Prasith [37]        |          | 2010                   | 0.021<br>(0.001-0.178) | 0.088<br>(0.040-0.561) | 0.376<br>(0.009-0.971) |                        |                        |                           | 0.386<br>(0.069-0.934) | 0.085<br>(0.005-0.712) | 1.69<br>(1.04-7.58) | 2.36<br>(1.04-13.03) | -22762 |

\*Assumption 1: individuals can be infected up to four times. Assumption 2: individuals are immune after 2 infections.



**Table S3 continued (3/5)**

| Author [Ref]     | Year | Country                | $\lambda$ (95% CrI)    | $\rho$ (95% CrI)       | $B$ (95% CrI)          | $\psi$ (95% CrI)       | $\gamma_1$ (95% CrI)   | $\gamma_3$ (95% CrI)   | $\lambda_{tot}$ (95% CrI) | $R_0$ * (95% CrI)      |                        | LnL                    |
|------------------|------|------------------------|------------------------|------------------------|------------------------|------------------------|------------------------|------------------------|---------------------------|------------------------|------------------------|------------------------|
|                  |      |                        |                        |                        |                        |                        |                        |                        |                           | 1                      | 2                      |                        |
| Anker [18]       | 1998 | Philippines            | 0.027<br>(0.004-0.069) | 0.028<br>(0.015-0.073) | NA                     | 0.168<br>(0.002-0.897) | 0.070<br>(0.003-0.563) | 0.537<br>(0.033-0.979) | 0.108<br>(0.018-0.277)    | 1.98<br>(1.16-3.32)    | 2.69<br>(1.25-5.14)    | -33865                 |
|                  | 1999 |                        | 0.028<br>(0.009-0.078) | 0.007<br>(0.003-0.014) | NA                     | 0.166<br>(0.002-0.904) |                        |                        | 0.113<br>(0.035-0.312)    | 2.09<br>(1.33-3.76)    | 2.89<br>(1.57-6.05)    | -9156                  |
|                  | 2001 |                        | 0.026<br>(0.002-0.075) | 0.018<br>(0.008-0.105) | NA                     | 0.223<br>(0.008-0.937) |                        |                        | 0.104<br>(0.008-0.299)    | 2.06<br>(1.08-3.84)    | 2.89<br>(1.10-6.17)    | -23843                 |
|                  | 2002 |                        | 0.027<br>(0.008-0.067) | 0.016<br>(0.008-0.034) | NA                     | 0.309<br>(0.037-0.930) |                        |                        | 0.108<br>(0.030-0.266)    | 2.10<br>(1.30-3.46)    | 2.92<br>(2.52-5.09)    | -16213                 |
|                  | 2003 |                        | 0.029<br>(0.006-0.078) | 0.026<br>(0.013-0.052) | NA                     | 0.340<br>(0.049-0.921) |                        |                        | 0.117<br>(0.026-0.311)    | 2.37<br>(1.28-4.34)    | 3.47<br>(1.48-6.66)    | -28567                 |
|                  | 2004 |                        | 0.026<br>(0.004-0.080) | 0.016<br>(0.009-0.041) | NA                     | 0.207<br>(0.006-0.933) |                        |                        | 0.105<br>(0.016-0.321)    | 2.04<br>(1.15-3.90)    | 2.82<br>(1.23-6.34)    | -22020                 |
|                  | 2005 |                        | 0.020<br>(0.001-0.064) | 0.030<br>(0.013-0.639) | NA                     | 0.243<br>(0.003-0.918) |                        |                        | 0.081<br>(0.004-0.258)    | 1.74<br>(1.04-3.15)    | 2.29<br>(1.04-4.80)    | -32194                 |
| Rigau-Perez [35] | 1994 |                        | Puerto Rico            | 0.022<br>(0.017-0.029) | 0.348<br>(0.236-0.487) | NA                     |                        |                        | 0.005<br>(0.002-0.017)    | 0.413<br>(0.110-0.884) | 0.637<br>(0.067-0.985) | 0.067<br>(0.050-0.087) |
|                  | 1995 | 0.020<br>(0.002-0.026) |                        | 0.033<br>(0.022-0.355) | NA                     | 0.007<br>(0.001-0.112) | 0.059<br>(0.007-0.079) | 1.73<br>(1.07-2.02)    | 2.06<br>(1.08-2.52)       |                        |                        | -3062                  |
|                  | 1996 | 0.019<br>(0.002-0.027) |                        | 0.030<br>(0.019-0.358) | NA                     | 0.009<br>(0.001-0.160) | 0.058<br>(0.006-0.080) | 1.71<br>(1.06-2.02)    | 2.01<br>(1.07-2.52)       |                        |                        | -2697                  |
|                  | 1997 | 0.021<br>(0.003-0.027) |                        | 0.035<br>(0.023-0.249) | NA                     | 0.006<br>(0.001-0.125) | 0.062<br>(0.010-0.082) | 1.77<br>(1.11-2.06)    | 2.12<br>(1.12-2.58)       |                        |                        | -3370                  |
| Ramos [36]       | 2006 | 0.017<br>(0.005-0.039) |                        | 0.362<br>(0.202-0.807) | NA                     | 0.046<br>(0.003-0.443) | 0.068<br>(0.019-0.155) | 1.62<br>(1.15-2.71)    | 2.27<br>(1.22-5.47)       |                        |                        | -203                   |
| Sharp [37]       | 2010 | 0.015<br>(0.002-0.027) |                        | 0.165<br>(0.101-0.845) | NA                     | 0.030<br>(0.012-0.116) | 0.059<br>(0.007-0.107) | 1.68<br>(1.07-2.37)    | 2.41<br>(1.09-4.21)       |                        |                        | -24291                 |
| Tomashek [38]    | 2007 | 0.010<br>(0.001-0.020) |                        | 0.053<br>(0.029-0.420) | NA                     | 0.026<br>(0.010-0.083) | 0.039<br>(0.005-0.079) | 1.37<br>(1.04-1.83)    | 1.67<br>(1.05-2.76)       |                        |                        | -7042                  |
| Anker [18]       | 1999 | Singapore              |                        | 0.003<br>(0.001-0.041) | 0.150<br>(0.026-0.886) | NA                     | 0.152<br>(0.004-0.896) | 0.053<br>(0.007-0.159) | 0.549<br>(0.027-0.976)    |                        |                        | 0.013<br>(0.003-0.166) |
|                  | 2000 |                        | 0.013<br>(0.001-0.054) | 0.023<br>(0.015-0.832) | NA                     | 0.228<br>(0.012-0.942) | 0.054<br>(0.002-0.215) |                        |                           | 1.76<br>(1.02-4.66)    | 2.58<br>(1.03-8.19)    | -362                   |
|                  | 2001 |                        | 0.016<br>(0.002-0.063) | 0.061<br>(0.048-0.436) | NA                     | 0.292<br>(0.013-0.955) | 0.066<br>(0.007-0.251) |                        |                           | 2.03<br>(1.09-6.10)    | 3.30<br>(1.12-11.86)   | -940                   |

\*Assumption 1: individuals can be infected up to four times. Assumption 2: individuals are immune after two infections.

**Table S3 continued (4/5)**

| Author [Ref] | Year       | Country                | $\lambda$ (95% CrI)    | $\rho$ (95% CrI)       | $\beta$ (95% CrI)      | $\psi$ (95% CrI)       | $\gamma_1$ (95% CrI)   | $\gamma_3$ (95% CrI)   | $\lambda_{tot}$ (95% CrI) | $R_0^*$ (95% CrI)      |                        | LnL                    |                        |
|--------------|------------|------------------------|------------------------|------------------------|------------------------|------------------------|------------------------|------------------------|---------------------------|------------------------|------------------------|------------------------|------------------------|
|              |            |                        |                        |                        |                        |                        |                        |                        |                           | 1                      | 2                      |                        |                        |
| Anker [18]   | 2002       | Singapore              | 0.008<br>(0.001-0.058) | 0.129<br>(0.065-0.916) | NA                     | 0.215<br>(0.011-0.945) | 0.053<br>(0.007-0.159) | 0.549<br>(0.027-0.976) | 0.032<br>(0.006-0.231)    | 1.42<br>(1.07-4.73)    | 1.77<br>(1.09-8.59)    | -1506                  |                        |
|              | 2003       |                        | 0.010<br>(0.003-0.060) | 0.136<br>(0.079-0.834) | NA                     | 0.249<br>(0.012-0.953) |                        |                        | 0.041<br>(0.007-0.241)    | 1.53<br>(1.08-4.89)    | 2.04<br>(1.11-8.90)    | -1859                  |                        |
|              | 2004       |                        | 0.010<br>(0.003-0.051) | 0.342<br>(0.169-0.904) | NA                     | 0.260<br>(0.014-0.952) |                        |                        | 0.039<br>(0.013-0.204)    | 1.46<br>(1.15-3.73)    | 1.86<br>(1.22-6.20)    | -4135                  |                        |
|              | 2005       |                        | 0.017<br>(0.003-0.069) | 0.289<br>(0.211-0.843) | NA                     | 0.310<br>(0.013-0.950) |                        |                        | 0.067<br>(0.014-0.278)    | 1.98<br>(1.17-6.09)    | 3.11<br>(1.26-11.75)   | -6857                  |                        |
|              | Koh [39]   |                        | 2005                   | 0.011<br>(0.006-0.014) | 0.266<br>(0.220-0.424) | NA                     |                        |                        | 0.007<br>(0.002-0.035)    | 0.043<br>(0.024-0.057) | 1.43<br>(1.22-1.58)    | 1.79<br>(1.35-2.18)    | -20559                 |
|              | Ler [23]   |                        | 2005                   | 0.012<br>(0.007-0.016) | 0.264<br>(0.220-0.377) | NA                     |                        |                        | 0.006<br>(0.001-0.041)    | 0.047<br>(0.028-0.064) | 1.47<br>(1.27-1.67)    | 1.91<br>(1.45-2.42)    | -25085                 |
|              |            |                        | 2007                   | 0.005<br>(0.002-0.008) | 0.336<br>(0.189-0.878) | NA                     |                        |                        | 0.005<br>(0.001-0.030)    | 0.019<br>(0.009-0.033) | 1.18<br>(1.08-1.32)    | 1.27<br>(1.10-1.56)    | -14719                 |
|              | Anker [18] |                        | 1996                   | Sri Lanka              | 0.033<br>(0.001-0.102) | 0.004<br>(0.002-0.427) |                        |                        | NA                        | 0.320<br>(0.038-0.919) | 0.218<br>(0.075-0.539) | 0.623<br>(0.049-0.975) | 0.133<br>(0.001-0.407) |
|              | 1997       | 0.028<br>(0.001-0.103) | 0.002<br>(0.001-0.346) |                        | NA                     | 0.214<br>(0.003-0.929) | 0.113<br>(0.001-0.412) | 2.41<br>(1.01-6.14)    | 3.69<br>(1.01-11.46)      | -810                   |                        |                        |                        |
|              | 1998       | 0.035<br>(0.001-0.115) | 0.003<br>(0.002-0.093) |                        | NA                     | 0.175<br>(0.002-0.923) | 0.138<br>(0.001-0.458) | 2.62<br>(1.02-6.14)    | 3.95<br>(1.03-11.69)      | -989                   |                        |                        |                        |
|              | 1999       | 0.024<br>(0.001-0.092) | 0.004<br>(0.002-0.673) |                        | NA                     | 0.227<br>(0.005-0.929) | 0.096<br>(0.001-0.369) | 2.14<br>(1.01-5.33)    | 3.17<br>(1.01-9.56)       | -1174                  |                        |                        |                        |
|              | 2000       | 0.022<br>(0.001-0.104) | 0.007<br>(0.004-0.665) |                        | NA                     | 0.223<br>(0.004-0.924) | 0.090<br>(0.001-0.415) | 2.16<br>(1.01-6.60)    | 3.30<br>(1.10-12.46)      | -2302                  |                        |                        |                        |
|              | 2001       | 0.017<br>(0.001-0.079) | 0.012<br>(0.006-0.846) |                        | NA                     | 0.279<br>(0.027-0.942) | 0.067<br>(0.001-0.315) | 1.92<br>(1.01-5.75)    | 2.90<br>(1.01-9.55)       | -2218                  |                        |                        |                        |
|              | 2002       | 0.003<br>(0.000-0.056) | 0.041<br>(0.006-0.911) |                        | NA                     | 0.130<br>(0.004-0.869) | 0.100<br>(0.001-0.222) | 1.12<br>(1.01-4.07)    | 1.16<br>(1.01-6.82)       | -2262                  |                        |                        |                        |
|              | 2003       | 0.002<br>(0.000-0.052) | 0.024<br>(0.003-0.794) |                        | NA                     | 0.127<br>(0.006-0.931) | 0.009<br>(0.001-0.207) | 1.11<br>(1.01-3.92)    | 1.15<br>(1.01-6.58)       | -1215                  |                        |                        |                        |
|              | 2004       | 0.010<br>(0.001-0.066) | 0.017<br>(0.008-0.854) |                        | NA                     | 0.186<br>(0.010-0.923) | 0.039<br>(0.001-0.264) | 1.48<br>(1.01-4.76)    | 1.92<br>(1.01-8.21)       | -2864                  |                        |                        |                        |
|              | 2005       | 0.006<br>(0.000-0.069) | 0.006<br>(0.002-0.673) |                        | NA                     | 0.163<br>(0.006-0.898) | 0.022<br>(0.001-0.275) | 1.29<br>(1.01-4.63)    | 1.49<br>(1.01-7.86)       | -881                   |                        |                        |                        |

\*Assumption 1: individuals can be infected up to four times. Assumption 2: individuals are immune after two infections.

**Table S3 continued (5/5).**

| Author [Ref]     | Year | Country   | $\lambda$ (95% CrI)    | $\rho$ (95% CrI)       | $\beta$ (95% CrI)      | $\psi$ (95% CrI)       | $\gamma_1$ (95% CrI)   | $\gamma_3$             | $\lambda_{tot}$ (95% CrI) | $R_0$ * (95% CrI)      |                      | LnL                  |      |
|------------------|------|-----------|------------------------|------------------------|------------------------|------------------------|------------------------|------------------------|---------------------------|------------------------|----------------------|----------------------|------|
|                  |      |           |                        |                        |                        |                        |                        |                        |                           | 1                      | 2                    |                      |      |
| Kulatilaka [40]  | 2010 | Sri Lanka | 0.066<br>(0.041-0.128) | 0.001<br>(0.001-0.001) | 0.084<br>(0.030-0.536) | 0.009<br>(0.003-0.046) | 0.218<br>(0.075-0.539) | 0.623<br>(0.049-0.975) | 0.264<br>(0.163-0.512)    | 3.65<br>(2.46-7.17)    | 7.43<br>(4.38-16.65) | -1565                |      |
| Limkittikul [41] | 2000 | Thailand  | 0.055<br>(0.034-0.209) | 0.012<br>(0.003-0.016) | 0.060<br>(0.011-0.734) | 0.032<br>(0.008-0.208) | 0.009<br>(0.001-0.040) | 0.527<br>(0.027-0.976) | 0.220<br>(0.135-0.838)    | 3.36<br>(2.32-12.32)   | 6.41<br>(3.94-24.95) | -29875               |      |
|                  | 2001 |           | 0.050<br>(0.033-0.090) | 0.091<br>(0.057-0.121) | 0.059<br>(0.011-0.178) | 0.032<br>(0.008-0.147) |                        |                        | 0.201<br>(0.133-0.361)    | 3.14<br>(2.31-5.35)    | 5.91<br>(3.93-10.79) | -225605              |      |
|                  | 2002 |           | 0.049<br>(0.028-0.125) | 0.080<br>(0.017-0.104) | 0.057<br>(0.013-0.770) | 0.035<br>(0.009-0.192) |                        |                        | 0.198<br>(0.144-0.500)    | 3.31<br>(2.17-8.31)    | 6.53<br>(2.67-17.57) | -188228              |      |
|                  | 2003 |           | 0.047<br>(0.027-0.204) | 0.038<br>(0.010-0.058) | 0.088<br>(0.012-0.760) | 0.044<br>(0.010-0.263) |                        |                        | 0.188<br>(0.107-0.818)    | 3.20<br>(2.11-14.47)   | 6.30<br>(3.52-30.64) | -107289              |      |
|                  | 2004 |           | 0.044<br>(0.024-0.214) | 0.023<br>(0.005-0.036) | 0.090<br>(0.011-0.886) | 0.043<br>(0.009-0.217) |                        |                        | 0.176<br>(0.095-0.857)    | 3.04<br>(1.97-15.31)   | 5.92<br>(3.15-32.37) | -66730               |      |
|                  | 2005 |           | 0.042<br>(0.022-0.145) | 0.028<br>(0.009-0.043) | 0.087<br>(0.010-0.599) | 0.035<br>(0.007-0.183) |                        |                        | 0.166<br>(0.090-0.579)    | 2.93<br>(1.91-10.20)   | 5.65<br>(3.02-21.82) | -79945               |      |
|                  | 2006 |           | 0.041<br>(0.013-0.207) | 0.027<br>(0.007-0.044) | 0.108<br>(0.011-0.714) | 0.050<br>(0.010-0.216) |                        |                        | 0.166<br>(0.051-0.829)    | 2.96<br>(1.48-15.33)   | 5.74<br>(1.92-32.31) | -80484               |      |
|                  | 2007 |           | 0.040<br>(0.025-0.066) | 0.051<br>(0.029-0.066) | 0.046<br>(0.006-0.179) | 0.029<br>(0.008-0.124) |                        |                        | 0.159<br>(0.100-0.263)    | 2.90<br>(2.07-4.61)    | 5.61<br>(3.44-9.71)  | -112810              |      |
|                  | 2008 |           | 0.037<br>(0.027-0.051) | 0.076<br>(0.042-0.090) | 0.031<br>(0.006-0.163) | 0.015<br>(0.004-0.082) |                        |                        | 0.147<br>(0.109-0.205)    | 2.74<br>(2.20-3.66)    | 5.20<br>(3.80-7.50)  | -159451              |      |
|                  | 2009 |           | 0.036<br>(0.023-0.169) | 0.043<br>(0.008-0.059) | 0.054<br>(0.007-0.818) | 0.022<br>(0.005-0.159) |                        |                        | 0.145<br>(0.091-0.678)    | 2.75<br>(1.98-12.94)   | 5.24<br>(3.22-26.94) | -103220              |      |
|                  | 2010 |           | 0.034<br>(0.027-0.044) | 0.100<br>(0.075-0.119) | 0.029<br>(0.005-0.078) | 0.009<br>(0.003-0.047) |                        |                        | 0.136<br>(0.106-0.176)    | 2.69<br>(2.24-3.34)    | 5.11<br>(3.92-6.77)  | -215302              |      |
| Wichmann [34]    | 2006 |           |                        | 0.041<br>(0.017-0.156) | 0.369<br>(0.211-0.947) | NA                     | 0.161<br>(0.005-0.889) |                        |                           | 0.163<br>(0.069-0.624) | 1.36<br>(1.14-3.02)  | 1.64<br>(1.19-8.60)  | -31  |
|                  | 2007 |           |                        | 0.068<br>(0.029-0.191) | 0.623<br>(0.471-0.963) | NA                     | 0.229<br>(0.017-0.908) |                        |                           | 0.272<br>(0.118-0.763) | 1.72<br>(1.27-4.04)  | 2.65<br>(1.45-12.97) | -114 |
| Bangkok^ [26]    | 2000 |           | 0.047<br>(0.038-0.055) | 0.055<br>(0.052-0.058) | NA                     | 0.013<br>(0.006-0.029) | 0                      | 0                      | 0.188<br>(0.151-0.219)    | 3.30<br>(2.73-3.84)    | 7.17<br>(5.49-8.69)  | -11467               |      |
| Ratchaburi^ [26] | 2000 |           | 0.050<br>(0.043-0.058) | 0.108<br>(0.103-0.115) | NA                     | 0.012<br>(0.005-0.033) | 0                      | 0                      | 0.202<br>(0.170-0.232)    | 3.37<br>(2.92-3.82)    | 6.59<br>(5.51-7.67)  | -2810                |      |
| Rayong [26]      | 2010 |           | 0.025<br>(0.023-0.027) | 0.114<br>(0.106-0.123) | NA                     | 0.001<br>(0.001-0.002) | 0.009<br>(0.001-0.040) | 0.527<br>(0.027-0.976) | 0.099<br>(0.092-0.107)    | 1.99<br>(1.91-2.08)    | 3.24<br>(3.02-3.49)  | -4128                |      |
| Ghouth [42]      | 2010 | Yemen     | 0.006<br>(0.001-0.018) | 0.163<br>(0.055-0.886) | NA                     | 0.080<br>(0.016-0.451) | 0.224<br>(0.006-0.933) | 0.491<br>(0.025-0.982) | 0.018<br>(0.002-0.054)    | 1.16<br>(1.02-1.48)    | 1.18<br>(1.02-1.66)  | -1792                |      |

\* Assumption 1: individuals can be infected up to four times. Assumption 2: individuals are immune after two infections. ^All cases reported = DHF, we have assumed that all cases were due to secondary cases and fixed  $\gamma_1$  and  $\gamma_3 = 0$ .

**Table S4: Summary parameter estimates from model 2 fitted to yearly incidence data (model 2A).**

| Author [Ref]  | Year | Country | $\lambda$<br>(95%CrI)  | $\rho_{young}$<br>(95%CrI) | $\rho_{old}$<br>(95%CrI) | $\beta$<br>(95%CrI) | Cutoff<br>(95%CrI) | $\psi$<br>(95%CrI)     | $\gamma_1$<br>(95%CrI) | $\gamma_3$<br>(95%CrI) | $\lambda_{tot}$<br>(95%CrI) | $R_0$ * (95%CrI)    |                     | LnL    |        |
|---------------|------|---------|------------------------|----------------------------|--------------------------|---------------------|--------------------|------------------------|------------------------|------------------------|-----------------------------|---------------------|---------------------|--------|--------|
|               |      |         |                        |                            |                          |                     |                    |                        |                        |                        |                             | 1                   | 2                   |        |        |
| Cordeiro [32] | 1995 | Brazil  | 0.013<br>(0.005-0.026) | 0.260<br>(0.084-0.947)     | 0.285<br>(0.054-0.941)   | NA                  | 65<br>(10-80)      | 0.008<br>(0.001-0.049) | 0.024<br>(0.003-0.058) | 0.550<br>(0.038-0.980) | 0.027<br>(0.011-0.051)      | 1.38<br>(1.15-1.77) | 1.38<br>(1.15-1.77) | -17854 |        |
|               | 1996 |         | 0.016<br>(0.009-0.031) | 0.467<br>(0.171-0.952)     | 0.382<br>(0.068-0.923)   | NA                  | 65<br>(15-80)      | 0.010<br>(0.002-0.060) |                        |                        | 0.032<br>(0.019-0.061)      | 1.52<br>(1.29-2.05) | 1.52<br>(1.23-2.05) | -40383 |        |
|               | 1997 |         | 0.016<br>(0.012-0.028) | 0.668<br>(0.275-0.975)     | 0.515<br>(0.081-0.931)   | NA                  | 65<br>(10-80)      | 0.008<br>(0.002-0.043) |                        |                        | 0.032<br>(0.024-0.055)      | 1.51<br>(1.37-1.93) | 1.51<br>(1.37-1.93) | -57709 |        |
|               | 1998 |         | 0.021<br>(0.017-0.028) | 0.686<br>(0.388-0.986)     | 0.837<br>(0.113-0.990)   | NA                  | 20<br>(15-80)      | 0.005<br>(0.001-0.038) |                        |                        | 0.041<br>(0.034-0.055)      | 1.67<br>(1.55-1.93) | 1.67<br>(1.55-1.93) | -93277 |        |
|               | 1999 |         | 0.017<br>(0.013-0.026) | 0.654<br>(0.290-0.964)     | 0.488<br>(0.082-0.924)   | NA                  | 65<br>(10-80)      | 0.003<br>(0.001-0.022) |                        |                        | 0.035<br>(0.025-0.052)      | 1.55<br>(1.39-1.87) | 1.55<br>(1.39-1.87) | -64111 |        |
|               | 2000 |         | 0.017<br>(0.010-0.026) | 0.514<br>(0.190-0.968)     | 0.458<br>(0.057-0.938)   | NA                  | 65<br>(15-80)      | 0.004<br>(0.001-0.028) |                        |                        | 0.033<br>(0.020-0.052)      | 1.55<br>(1.32-1.89) | 1.55<br>(1.32-1.89) | -50580 |        |
|               | 2001 |         | 0.016<br>(0.007-0.025) | 0.336<br>(0.190-0.924)     | 0.352<br>(0.053-0.935)   | NA                  | 65<br>(5-80)       | 0.005<br>(0.001-0.029) |                        |                        | 0.031<br>(0.015-0.051)      | 1.51<br>(1.23-1.88) | 1.51<br>(1.23-1.88) | -31021 |        |
|               | 2002 |         | 0.024<br>(0.021-0.032) | 0.949<br>(0.752-0.998)     | 0.683<br>(0.041-0.993)   | NA                  | 80<br>(10-80)      | 0.044<br>(0.015-0.169) |                        |                        | 0.071<br>(0.064-0.095)      | 1.81<br>(1.72-2.14) | 2.18<br>(2.03-2.72) | -      | 209223 |
|               | 2003 |         | 0.010<br>(0.006-0.015) | 0.487<br>(0.275-0.972)     | 0.413<br>(0.072-0.956)   | NA                  | 65<br>(5-80)       | 0.007<br>(0.001-0.040) |                        |                        | 0.031<br>(0.018-0.046)      | 1.33<br>(1.19-1.50) | 1.42<br>(1.22-1.68) | -47533 |        |
|               | 2004 |         | 0.014<br>(0.003-0.018) | 0.078<br>(0.057-0.704)     | 0.376<br>(0.021-0.972)   | NA                  | 80<br>(5-80)       | 0.005<br>(0.001-0.046) |                        |                        | 0.041<br>(0.009-0.055)      | 1.44<br>(1.09-1.61) | 1.60<br>(1.10-1.86) | -11581 |        |

\*Assumption 1: individuals can be infected up to four times. Assumption 2: individuals are immune after two infections.

**Table S4 continued (2/8).**

| Author [Ref]  | Year | Country                | $\lambda$<br>(95%CrI)  | $\rho_{young}$<br>(95%CrI) | $\rho_{old}$<br>(95%CrI) | B<br>(95%CrI)          | Cutoff<br>(95%CrI) | $\psi$<br>(95%CrI)     | $\gamma_1$<br>(95%CrI) | $\gamma_3$<br>(95%CrI) | $\lambda_{tot}$<br>(95%CrI) | $R_0$ *                |                        | LnL                    |                        |
|---------------|------|------------------------|------------------------|----------------------------|--------------------------|------------------------|--------------------|------------------------|------------------------|------------------------|-----------------------------|------------------------|------------------------|------------------------|------------------------|
|               |      |                        |                        |                            |                          |                        |                    |                        |                        |                        |                             | 1                      | 2                      |                        |                        |
| Cordeiro [32] | 2005 | Brazil                 | 0.012<br>(0.004-0.018) | 0.182<br>(0.116-0.767)     | 0.302<br>(0.035-0.965)   | NA                     | 80<br>(5-80)       | 0.007<br>(0.002-0.041) | 0.024<br>(0.003-0.058) | 0.550<br>(0.038-0.980) | 0.035<br>(0.013-0.053)      | 1.38<br>(1.13-1.58)    | 1.50<br>(1.16-1.82)    | -23548                 |                        |
|               | 2006 |                        | 0.014<br>(0.005-0.022) | 0.220<br>(0.129-0.892)     | 0.281<br>(0.046-0.947)   | NA                     | 80<br>(5-80)       | 0.010<br>(0.003-0.056) |                        |                        |                             | 0.041<br>(0.015-0.066) | 1.45<br>(1.15-1.76)    | 1.61<br>(1.18-2.09)    | -34400                 |
| Penna [12]    | 2001 |                        | 0.007<br>(0.003-0.081) | 0.265<br>(0.009-0.910)     | 0.466<br>(0.066-0.976)   | 0.022<br>(0.001-0.875) | 70<br>(15-90)      | 0.049<br>(0.002-0.671) |                        |                        |                             | 0.027<br>(0.010-0.324) | 1.19<br>(1.07-3.95)    | 1.29<br>(1.09-7.47)    | -14641                 |
|               | 2002 |                        | 0.008<br>(0.002-0.076) | 0.113<br>(0.009-0.879)     | 0.370<br>(0.043-0.938)   | 0.053<br>(0.000-0.946) | 70<br>(15-90)      | 0.093<br>(0.003-0.851) |                        |                        |                             | 0.030<br>(0.009-0.304) | 1.21<br>(1.06-3.74)    | 1.34<br>(1.08-7.01)    | -9048                  |
|               | 2003 |                        | 0.009<br>(0.001-0.074) | 0.096<br>(0.014-0.816)     | 0.395<br>(0.060-0.948)   | 0.110<br>(0.001-0.962) | 70<br>(15-90)      | 0.127<br>(0.004-0.748) |                        |                        |                             | 0.037<br>(0.005-0.296) | 1.26<br>(1.03-3.66)    | 1.43<br>(1.04-6.83)    | -10374                 |
|               | 2004 |                        | 0.006<br>(0.002-0.076) | 0.124<br>(0.006-0.787)     | 0.310<br>(0.033-0.954)   | 0.018<br>(0.001-0.874) | 70<br>(15-90)      | 0.065<br>(0.004-0.787) |                        |                        |                             | 0.024<br>(0.007-0.304) | 1.17<br>(1.05-3.74)    | 1.25<br>(1.06-7.01)    | -5541                  |
|               | 2005 |                        | 0.005<br>(0.002-0.077) | 0.251<br>(0.017-0.870)     | 0.435<br>(0.054-0.960)   | 0.009<br>(0.001-0.681) | 70<br>(15-90)      | 0.045<br>(0.004-0.510) |                        |                        |                             | 0.021<br>(0.008-0.311) | 1.15<br>(1.05-3.78)    | 1.26<br>(1.06-7.10)    | -8558                  |
|               | 2006 |                        | 0.005<br>(0.002-0.052) | 0.231<br>(0.013-0.749)     | 0.383<br>(0.047-0.944)   | 0.009<br>(0.001-0.465) | 70<br>(15-90)      | 0.031<br>(0.001-0.459) |                        |                        |                             | 0.021<br>(0.009-0.207) | 1.15<br>(1.06-2.76)    | 1.22<br>(1.08-4.83)    | -7825                  |
| Vong [33]     | 2006 |                        | Cambodia               | 0.077<br>(0.056-0.127)     | 0.190<br>(0.123-0.220)   | 0.099<br>(0.025-0.797) | NA                 | 16<br>(6-21)           |                        |                        |                             | 0.011<br>(0.004-0.027) | 0.128<br>(0.068-0.279) | 0.508<br>(0.030-0.977) | 0.310<br>(0.224-0.506) |
|               | 2007 | 0.069<br>(0.056-0.078) |                        | 0.957<br>(0.759-0.999)     | 0.312<br>(0.044-0.947)   | NA                     | 20<br>(6-21)       | 0.004<br>(0.002-0.010) | 0.275<br>(0.223-0.318) | 1.99<br>(1.77-2.19)    | 3.35<br>(2.71-3.94)         | -110702                |                        |                        |                        |
|               | 2008 | 0.046<br>(0.032-0.059) |                        | 0.345<br>(0.282-0.420)     | 0.042<br>(0.013-0.128)   | NA                     | 18<br>(17-18)      | 0.005<br>(0.002-0.012) | 0.183<br>(0.127-0.234) | 1.61<br>(1.40-1.81)    | 2.27<br>(1.73-2.82)         | -34269                 |                        |                        |                        |

\*Assumption 1: individuals can be infected up to four times. Assumption 2: individuals are immune after two infections.

**Table S4 continued (3/8).**

| Author [Ref]  | Year                 | Country                | $\lambda$<br>(95%CrI)  | $\rho_{young}$<br>(95%CrI) | $\rho_{old}$<br>(95%CrI) | B<br>(95%CrI)          | Cutoff<br>(95%CrI)     | $\psi$<br>(95%CrI)     | $\gamma_1$<br>(95%CrI) | $\gamma_3$<br>(95%CrI) | $\lambda_{tot}$<br>(95%CrI) | $R_0$ * (95%CrI)       |                        | LnL                  |                      |
|---------------|----------------------|------------------------|------------------------|----------------------------|--------------------------|------------------------|------------------------|------------------------|------------------------|------------------------|-----------------------------|------------------------|------------------------|----------------------|----------------------|
|               |                      |                        |                        |                            |                          |                        |                        |                        |                        |                        |                             | 1                      | 2                      |                      |                      |
| Wichmann [34] | 2006                 | Cambodia               | 0.043<br>(0.014-0.238) | 0.310<br>(0.140-0.927)     | 0.558<br>(0.044-0.976)   | NA                     | 15<br>(5-15)           | 0.227<br>(0.010-0.929) | 0.265<br>(0.062-0.705) | 0.589<br>(0.046-0.981) | 0.171<br>(0.056-0.952)      | 1.38<br>(1.11-5.02)    | 1.69<br>(1.15-19.78)   | -31                  |                      |
|               | 2007                 |                        | 0.078<br>(0.050-0.187) | 0.882<br>(0.630-0.993)     | 0.626<br>(0.021-0.985)   | NA                     | 15<br>(5-15)           | 0.157<br>(0.002-0.884) |                        |                        |                             | 0.313<br>(0.201-0.747) | 1.73<br>(1.44-3.12)    | 2.58<br>(1.83-6.16)  | -543                 |
| Anker [18]    | 2000                 | Laos                   | 0.001<br>(0.000-0.150) | 0.410<br>(0.002-0.947)     | 0.291<br>(0.026-0.949)   | NA                     | 15<br>(5-15)           | 0.217<br>(0.010-0.913) | 0.070<br>(0.003-0.563) | 0.537<br>(0.033-0.979) | 0.005<br>(0.001-0.600)      | 1.05<br>(1.01-6.06)    | 1.06<br>(1.01-10.06)   | -1052                |                      |
|               | 2001                 |                        | 0.003<br>(0.001-0.166) | 0.300<br>(0.006-0.956)     | 0.277<br>(0.041-0.964)   | NA                     | 15<br>(5-15)           | 0.238<br>(0.008-0.918) |                        |                        |                             | 0.014<br>(0.004-0.663) | 1.12<br>(1.03-6.36)    | 1.18<br>(1.04-13.31) | -3631                |
|               | 2002                 |                        | 0.017<br>(0.002-0.127) | 0.120<br>(0.019-0.937)     | 0.251<br>(0.072-0.922)   | NA                     | 15<br>(5-15)           | 0.235<br>(0.007-0.933) |                        |                        |                             | 0.070<br>(0.008-0.510) | 1.74<br>(1.08-5.54)    | 2.36<br>(1.11-9.44)  | -8186                |
|               | 2003                 |                        | 0.021<br>(0.003-0.121) | 0.162<br>(0.040-0.959)     | 0.405<br>(0.112-0.971)   | NA                     | 15<br>(5-15)           | 0.238<br>(0.010-0.931) |                        |                        |                             | 0.085<br>(0.011-0.486) | 1.81<br>(1.11-5.20)    | 2.43<br>(1.15-9.94)  | -17292               |
|               | 2004                 |                        | 0.006<br>(0.001-0.176) | 0.196<br>(0.007-0.957)     | 0.241<br>(0.030-0.904)   | NA                     | 15<br>(5-15)           | 0.225<br>(0.005-0.928) |                        |                        |                             | 0.022<br>(0.003-0.706) | 1.19<br>(1.02-6.53)    | 1.30<br>(1.02-14.35) | -3281                |
|               | 2005                 |                        | 0.045<br>(0.001-0.179) | 0.026<br>(0.011-0.969)     | 0.309<br>(0.050-0.961)   | NA                     | 15<br>(5-15)           | 0.230<br>(0.009-0.918) |                        |                        |                             | 0.181<br>(0.005-0.714) | 2.36<br>(1.04-6.17)    | 3.31<br>(1.05-13.61) | -5243                |
|               | 2006                 |                        | 0.034<br>(0.001-0.169) | 0.032<br>(0.011-0.950)     | 0.310<br>(0.050-0.944)   | NA                     | 15<br>(5-15)           | 0.219<br>(0.010-0.923) |                        |                        |                             | 0.137<br>(0.005-0.677) | 2.20<br>(1.05-6.51)    | 3.05<br>(1.06-14.10) | -5948                |
|               | Khampa-pongpane [43] |                        | 2010                   | 0.020<br>(0.002-0.161)     | 0.083<br>(0.017-0.712)   | 0.240<br>(0.046-0.925) | 0.114<br>(0.003-0.869) | 40<br>(5-40)           |                        |                        |                             | 0.090<br>(0.010-0.615) | 0.080<br>(0.006-0.644) | 1.58<br>(1.04-6.49)  | 2.06<br>(1.05-12.46) |
| Prasith [44]  | 2010                 | 0.041<br>(0.002-0.178) | 0.066<br>(0.007-0.586) | 0.364<br>(0.041-0.952)     | 0.391<br>(0.016-0.965)   | 80<br>(5-80)           | 0.365<br>(0.034-0.942) | 0.161<br>(0.007-0.712) | 2.42<br>(1.05-7.58)    | 3.96<br>(1.06-13.03)   | -22762                      |                        |                        |                      |                      |

\*Assumption 1: individuals can be infected up to four times. Assumption 2: individuals are immune after two infections.

**Table S4 continued (4/8)**

| Author [Ref]     | Year | Country     | $\lambda$ (95%CrI)     | $\rho_{young}$ (95%CrI) | $\rho_{old}$ (95%CrI)  | $B$ (95%CrI) | Cutoff (95%CrI) | $\psi$ (95%CrI)        | $\gamma_1$ (95%CrI)    | $\gamma_3$ (95%CrI)    | $\lambda_{tot}$ (95%CrI) | $R_0$ * (95%CrI)       |                     | LnL                  |        |
|------------------|------|-------------|------------------------|-------------------------|------------------------|--------------|-----------------|------------------------|------------------------|------------------------|--------------------------|------------------------|---------------------|----------------------|--------|
|                  |      |             |                        |                         |                        |              |                 |                        |                        |                        |                          | 1                      | 2                   |                      |        |
| Anker [18]       | 1998 | Philippines | 0.004<br>(0.001-0.118) | 0.369<br>(0.007-0.970)  | 0.130<br>(0.017-0.879) | NA           | 15<br>(5-15)    | 0.284<br>(0.007-0.924) | 0.070<br>(0.003-0.563) | 0.537<br>(0.033-0.979) | 0.014<br>(0.004-0.472)   | 1.13<br>(1.04-4.78)    | 1.19<br>(1.05-8.67) | -33864               |        |
|                  | 1999 |             | 0.068<br>(0.001-0.147) | 0.004<br>(0.001-0.939)  | 0.147<br>(0.006-0.857) | NA           | 15<br>(5-15)    | 0.361<br>(0.014-0.940) |                        |                        |                          | 0.271<br>(0.001-0.588) | 3.43<br>(1.01-6.02) | 5.34<br>(1.01-11.83) | -9157  |
|                  | 2001 |             | 0.002<br>(0.001-0.004) | 0.644<br>(0.167-0.981)  | 0.102<br>(0.019-0.671) | NA           | 15<br>(5-15)    | 0.239<br>(0.008-0.897) |                        |                        |                          | 0.007<br>(0.002-0.017) | 1.07<br>(1.02-1.17) | 1.10<br>(1.02-1.25)  | -23843 |
|                  | 2002 |             | 0.001<br>(0.001-0.109) | 0.610<br>(0.005-0.975)  | 0.148<br>(0.010-0.818) | NA           | 15<br>(5-15)    | 0.337<br>(0.033-0.936) |                        |                        |                          | 0.006<br>(0.002-0.436) | 1.06<br>(1.02-4.72) | 1.07<br>(1.02-7.58)  | -16213 |
|                  | 2003 |             | 0.018<br>(0.002-0.134) | 0.050<br>(0.004-0.927)  | 0.044<br>(0.008-0.768) | NA           | 15<br>(5-15)    | 0.374<br>(0.034-0.936) |                        |                        |                          | 0.073<br>(0.007-0.535) | 1.83<br>(1.07-6.31) | 2.58<br>(1.09-10.72) | -28567 |
|                  | 2004 |             | 0.002<br>(0.001-0.006) | 0.536<br>(0.104-0.980)  | 0.086<br>(0.012-0.802) | NA           | 15<br>(5-15)    | 0.250<br>(0.010-0.926) |                        |                        |                          | 0.007<br>(0.003-0.022) | 1.07<br>(1.02-1.22) | 1.09<br>(1.03-1.35)  | -22019 |
|                  | 2005 |             | 0.080<br>(0.017-0.142) | 0.010<br>(0.005-0.033)  | 0.182<br>(0.020-0.898) | NA           | 15<br>(15-15)   | 0.391<br>(0.027-0.967) |                        |                        |                          | 0.319<br>(0.068-0.568) | 3.60<br>(1.62-5.49) | 5.78<br>(2.10-10.62) | -32194 |
| Rigau-Perez [35] | 1994 | Puerto Rico | 0.021<br>(0.012-0.029) | 0.459<br>(0.283-0.927)  | 0.472<br>(0.175-0.956) | NA           | 55<br>(20-99)   | 0.003<br>(0.001-0.017) | 0.413<br>(0.110-0.884) | 0.637<br>(0.067-0.985) | 0.063<br>(0.037-0.086)   | 1.84<br>(1.47-2.22)    | 2.24<br>(1.64-2.86) | -50387               |        |
|                  | 1995 |             | 0.019<br>(0.001-0.028) | 0.041<br>(0.026-0.747)  | 0.378<br>(0.020-0.972) | NA           | 85<br>(30-85)   | 0.008<br>(0.001-0.181) |                        |                        |                          | 0.058<br>(0.004-0.084) | 1.71<br>(1.04-2.09) | 2.03<br>(1.05-2.64)  | -3062  |
|                  | 1996 |             | 0.019<br>(0.010-0.026) | 0.037<br>(0.025-0.801)  | 0.379<br>(0.026-0.959) | NA           | 85<br>(30-85)   | 0.011<br>(0.001-0.296) |                        |                        |                          | 0.056<br>(0.004-0.076) | 1.68<br>(1.04-1.96) | 1.98<br>(1.04-2.43)  | -2697  |
|                  | 1997 |             | 0.020<br>(0.001-0.025) | 0.042<br>(0.027-0.829)  | 0.340<br>(0.019-0.977) | NA           | 85<br>(30-85)   | 0.009<br>(0.001-0.214) |                        |                        |                          | 0.061<br>(0.006-0.088) | 1.76<br>(1.06-2.15) | 2.10<br>(1.07-2.73)  | -3371  |

\*Assumption 1: individuals can be infected up to four times. Assumption 2: individuals are immune after two infections.

**Table S4 continued (5/8)**

| Author [Ref]  | Year | Country     | $\lambda$ (95%CrI)  | $\rho_{young}$ (95%CrI) | $\rho_{old}$ (95%CrI) | $\beta$ (95%CrI) | Cutoff (95%CrI) | $\psi$ (95%CrI)     | $\gamma_1$ (95%CrI) | $\gamma_3$ (95%CrI) | $\lambda_{tot}$ (95%CrI) | $R_0^*$ (95%CrI)  |                   | LnL    |
|---------------|------|-------------|---------------------|-------------------------|-----------------------|------------------|-----------------|---------------------|---------------------|---------------------|--------------------------|-------------------|-------------------|--------|
|               |      |             |                     |                         |                       |                  |                 |                     |                     |                     |                          | 1                 | 2                 |        |
| Ramos [36]    | 2006 | Puerto Rico | 0.017 (0.006-0.043) | 0.443 (0.179-0.928)     | 0.470 (0.078-0.959)   | NA               | 40 (00-61)      | 0.038 (0.001-0.450) | 0.413 (0.110-0.884) | 0.637 (0.067-0.985) | 0.069 (0.023-0.171)      | 1.63 (1.19-2.93)  | 2.30 (1.28-6.22)  | -203   |
| Sharp [37]    | 2010 |             | 0.015 (0.003-0.030) | 0.199 (0.108-0.944)     | 0.276 (0.114-0.925)   | NA               | 50 (150-81)     | 0.020 (0.004-0.076) |                     |                     | 0.059 (0.010-0.119)      | 1.67 (1.10-2.55)  | 2.39 (1.13-4.68)  | -24289 |
| Tomashek [38] | 2007 |             | 0.010 (0.001-0.023) | 0.066 (0.035-0.936)     | 0.240 (0.044-0.947)   | NA               | 70 (15-85)      | 0.023 (0.007-0.075) |                     |                     | 0.040 (0.002-0.090)      | 1.39 (1.02-1.97)  | 1.70 (1.02-3.10)  | -7042  |
| Anker [18]    | 1999 | Singapore   | 0.003 (0.001-0.126) | 0.321 (0.004-0.951)     | 0.313 (0.039-0.934)   | NA               | 15 (5-15)       | 0.217 (0.005-0.948) | 0.053 (0.007-0.159) | 0.549 (0.027-0.976) | 0.010 (0.004-0.505)      | 1.11 (1.04-7.44)  | 1.16 (1.04-14.84) | -521   |
|               | 2000 |             | 0.002 (0.001-0.162) | 0.351 (0.002-0.975)     | 0.171 (0.017-0.919)   | NA               | 15 (5-15)       | 0.264 (0.019-0.943) |                     |                     | 0.010 (0.002-0.647)      | 1.13 (1.03-12.07) | 1.18 (1.03-23.43) | -362   |
|               | 2001 |             | 0.011 (0.001-0.123) | 0.136 (0.008-0.947)     | 0.167 (0.033-0.940)   | NA               | 15 (5-15)       | 0.320 (0.16-0.958)  |                     |                     | 0.044 (0.005-0.491)      | 1.64 (1.06-11.61) | 2.31 (1.07-22.52) | -940   |
|               | 2002 |             | 0.007 (0.002-0.103) | 0.241 (0.010-0.961)     | 0.280 (0.065-0.938)   | NA               | 15 (5-15)       | 0.280 (0.015-0.956) |                     |                     | 0.029 (0.007-0.410)      | 1.36 (1.08-7.86)  | 1.65 (1.10-15.94) | -1506  |
|               | 2003 |             | 0.013 (0.002-0.106) | 0.133 (0.011-0.946)     | 0.275 (0.076-0.961)   | NA               | 15 (5-15)       | 0.307 (0.013-0.955) |                     |                     | 0.053 (0.007-0.424)      | 1.72 (1.08-8.08)  | 2.45 (1.11-16.38) | -1859  |
|               | 2004 |             | 0.015 (0.003-0.078) | 0.228 (0.031-0.946)     | 0.441 (0.169-0.952)   | NA               | 15 (5-15)       | 0.305 (0.010-0.959) |                     |                     | 0.061 (0.014-0.313)      | 1.77 (1.16-5.20)  | 2.49 (1.23-9.34)  | -4135  |
|               | 2005 |             | 0.024 (0.004-0.084) | 0.227 (0.046-0.943)     | 0.367 (0.149-0.942)   | NA               | 15 (5-15)       | 0.316 (0.019-0.950) |                     |                     | 0.097 (0.018-0.336)      | 2.51 (1.22-7.29)  | 4.30 (1.36-14.45) | -6857  |

\*Assumption 1: individuals can be infected up to four times. Assumption 2: individuals are immune after two infections.



**Table S4 continued (6/8).**

| Author [Ref] | Year | Country   | $\lambda$ (95%CrI)     | $\rho_{young}$ (95%CrI) | $\rho_{old}$ (95%CrI)  | $\beta$ (95%CrI) | Cutoff (95%CrI) | $\psi$ (95%CrI)        | $\gamma_1$ (95%CrI)    | $\gamma_3$ (95%CrI)    | $\lambda_{tot}$ (95%CrI) | $R_0^*$ (95%CrI)     |                      | LnL    |
|--------------|------|-----------|------------------------|-------------------------|------------------------|------------------|-----------------|------------------------|------------------------|------------------------|--------------------------|----------------------|----------------------|--------|
|              |      |           |                        |                         |                        |                  |                 |                        |                        |                        |                          | 1                    | 2                    |        |
| Koh [39]     | 2005 | Singapore | 0.011<br>(0.005-0.016) | 0.265<br>(0.191-0.777)  | 0.361<br>(0.089-0.945) | NA               | 65<br>(25-85)   | 0.007<br>(0.002-0.036) | 0.053<br>(0.007-0.159) | 0.549<br>(0.027-0.976) | 0.043<br>(0.021-0.065)   | 1.43<br>(1.19-1.67)  | 1.80<br>(1.29-2.41)  | -20559 |
| Ler [23]     | 2005 |           | 0.012<br>(0.006-0.017) | 0.267<br>(0.199-0.649)  | 0.336<br>(0.028-0.955) | NA               | 81<br>(15-81)   | 0.007<br>(0.001-0.053) |                        |                        | 0.048<br>(0.025-0.067)   | 1.48<br>(1.23-1.72)  | 1.92<br>(1.37-2.54)  | -25085 |
|              | 2007 |           | 0.004<br>(0.002-0.009) | 0.382<br>(0.169-0.941)  | 0.458<br>(0.051-0.958) | NA               | 81<br>(15-81)   | 0.004<br>(0.001-0.031) |                        |                        | 0.018<br>(0.009-0.034)   | 1.17<br>(1.08-1.34)  | 1.24<br>(1.10-1.59)  | -14719 |
| Anker [18]   | 1996 | Sri Lanka | 0.001<br>(0.001-0.028) | 0.352<br>(0.001-0.970)  | 0.094<br>(0.004-0.854) | NA               | 15<br>(55-15)   | 0.358<br>(0.034-0.947) | 0.218<br>(0.075-0.539) | 0.623<br>(0.049-0.975) | 0.004<br>(0.001-0.112)   | 1.05<br>(1.01-2.65)  | 1.06<br>(1.01-4.35)  | -1139  |
|              | 1997 |           | 0.001<br>(0.000-0.192) | 0.603<br>(0.001-0.979)  | 0.122<br>(0.008-0.720) | NA               | 15<br>(55-15)   | 0.210<br>(0.004-0.907) |                        |                        | 0.002<br>(0.001-0.768)   | 1.02<br>(1.01-10.89) | 1.02<br>(1.01-24.78) | -810   |
|              | 1998 |           | 0.024<br>(0.000-0.043) | 0.381<br>(0.001-0.961)  | 0.147<br>(0.004-0.846) | NA               | 15<br>(5-15)    | 0.359<br>(0.005-0.947) |                        |                        | 0.096<br>(0.001-0.172)   | 2.11<br>(1.01-3.01)  | 3.08<br>(1.01-4.64)  | -990   |
|              | 1999 |           | 0.001<br>(0.000-0.076) | 0.333<br>(0.001-0.955)  | 0.165<br>(0.007-0.913) | NA               | 15<br>(5-15)    | 0.281<br>(0.005-0.936) |                        |                        | 0.005<br>(0.001-0.304)   | 1.05<br>(1.01-4.59)  | 1.06<br>(1.01-7.86)  | -1175  |
|              | 2000 |           | 0.016<br>(0.001-0.107) | 0.020<br>(0.002-0.968)  | 0.185<br>(0.008-0.926) | NA               | 15<br>(5-15)    | 0.312<br>(0.006-0.943) |                        |                        | 0.063<br>(0.001-0.429)   | 1.79<br>(1.01-6.80)  | 2.56<br>(1.01-12.95) | -2302  |
|              | 2001 |           | 0.004<br>(0.001-0.246) | 0.134<br>(0.002-0.956)  | 0.170<br>(0.011-0.918) | NA               | 15<br>(5-15)    | 0.345<br>(0.026-0.936) |                        |                        | 0.017<br>(0.001-0.982)   | 1.21<br>(1.01-14.83) | 1.32<br>(1.02-32.20) | -2218  |
|              | 2002 |           | 0.002<br>(0.001-0.234) | 0.399<br>(0.002-0.973)  | 0.270<br>(0.015-0.936) | NA               | 15<br>(5-15)    | 0.198<br>(0.009-0.935) |                        |                        | 0.004<br>(0.001-0.936)   | 1.05<br>(1.01-14.64) | 1.06<br>(1.01-35.58) | -2263  |

\*Assumption 1: individuals can be infected up to four times. Assumption 2: individuals are immune after two infections.

**Table S4 continued (7/8).**

| Author [Ref]     | Year            | Country   | $\lambda$ (95%CrI)  | $\rho_{young}$ (95%CrI) | $\rho_{old}$ (95%CrI) | $\beta$ (95%CrI)    | Cutoff (95%CrI)     | $\psi$ (95%CrI)     | $\gamma_1$ (95%CrI) | $\gamma_3$ (95%CrI) | $\lambda_{tot}$ (95%CrI) | $R_0^*$ (95%CrI)    |                   | LnL               |
|------------------|-----------------|-----------|---------------------|-------------------------|-----------------------|---------------------|---------------------|---------------------|---------------------|---------------------|--------------------------|---------------------|-------------------|-------------------|
|                  |                 |           |                     |                         |                       |                     |                     |                     |                     |                     |                          | 1                   | 2                 |                   |
| Anker [18]       | 2003            | Sri Lanka | 0.001 (0.000-0.213) | 0.530 (0.001-0.977)     | 0.260 (0.015-0.884)   | NA                  | 15 (5-15)           | 0.181 (0.008-0.909) | 0.218 (0.075-0.539) | 0.623 (0.049-0.975) | 0.002 (0.001-0.852)      | 1.03 (1.01-13.55)   | 1.03 (1.01-31.5)  | -1215             |
|                  | 2004            |           | 0.003 (0.001-0.246) | 0.156 (0.002-0.961)     | 0.242 (0.015-0.953)   | NA                  | 15 (5-15)           | 0.301 (0.009-0.957) |                     |                     | 0.010 (0.001-0.983)      | 1.13 (1.01-15.83)   | 1.18 (1.02-38.87) | -2865             |
|                  | 2005            |           | 0.001 (0.000-0.086) | 0.496 (0.001-0.958)     | 0.246 (0.013-0.891)   | NA                  | 15 (5-15)           | 0.166 (0.003-0.918) |                     |                     | 0.002 (0.001-0.344)      | 1.02 (1.01-5.52)    | 1.02 (1.01-9.75)  | -882              |
|                  | Kulatilaka [40] |           | 2010                | 0.066 (0.040-0.128)     | 0.001 (0.001-0.002)   | 0.485 (0.002-0.979) | 0.077 (0.029-0.445) | 65 (55-65)          |                     |                     | 0.010 (0.003-0.057)      | 0.264 (0.159-0.512) | 3.65 (2.41-7.17)  | 7.43 (4.26-16.65) |
| Limkittikul [41] | 2000            | Thailand  | 0.068 (0.030-0.189) | 0.007 (0.002-0.016)     | 0.457 (0.010-0.974)   | 0.220 (0.012-0.901) | 80 (55-80)          | 0.075 (0.010-0.310) | 0.009 (0.001-0.040) | 0.527 (0.027-0.976) | 0.270 (0.120-0.756)      | 4.02 (2.15-11.10)   | 7.90 (3.54-22.5)  | -29877            |
|                  | 2001            |           | 0.049 (0.033-0.079) | 0.099 (0.068-0.123)     | 0.354 (0.030-0.960)   | 0.043 (0.004-0.117) | 80 (35-80)          | 0.027 (0.008-0.133) |                     |                     | 0.197 (0.132-0.315)      | 3.09 (2.30-4.69)    | 5.80 (3.92-9.37)  | -225604           |
|                  | 2002            |           | 0.055 (0.019-0.225) | 0.055 (0.026-0.095)     | 0.364 (0.014-0.963)   | 0.157 (0.023-0.447) | 80 (25-80)          | 0.069 (0.014-0.275) |                     |                     | 0.220 (0.076-0.900)      | 3.63 (1.73-15.55)   | 7.30 (2.54-39.49) | -188228           |
|                  | 2003            |           | 0.049 (0.028-0.208) | 0.037 (0.008-0.060)     | 0.410 (0.022-0.970)   | 0.098 (0.006-0.927) | 80 (45-80)          | 0.052 (0.009-0.263) |                     |                     | 0.196 (0.113-0.832)      | 3.32 (2.17-14.74)   | 6.59 (3.69-27.66) | -107291           |
|                  | 2004            |           | 0.041 (0.021-0.084) | 0.030 (0.013-0.067)     | 0.376 (0.017-0.958)   | 0.038 (0.002-0.290) | 80 (15-80)          | 0.025 (0.007-0.129) |                     |                     | 0.164 (0.083-0.335)      | 2.87 (1.82-5.60)    | 5.47 (2.77-11.87) | -66728            |
|                  | 2005            |           | 0.038 (0.027-0.058) | 0.037 (0.023-0.045)     | 0.361 (0.021-0.970)   | 0.035 (0.002-0.132) | 80 (35-80)          | 0.021 (0.007-0.101) |                     |                     | 0.154 (0.109-0.234)      | 2.75 (2.15-3.97)    | 5.20 (3.65-8.18)  | -79944            |

\*Assumption 1: individuals can be infected up to four times. Assumption 2: individuals are immune after two infections.

**Table S4 continued (8/8).**

| Author [Ref]     | Year | Country                | $\lambda$ (95%CrI)     | $\rho_{young}$ (95%CrI) | $\rho_{old}$ (95%CrI)  | $\beta$ (95%CrI)       | Cutoff (95%CrI)        | $\psi$ (95%CrI)        | $\gamma_1$ (95%CrI)    | $\gamma_3$ (95%CrI)    | $\lambda_{tot}$ (95%CrI) | $R_0$ (95%CrI)*     |                      | LnL     |
|------------------|------|------------------------|------------------------|-------------------------|------------------------|------------------------|------------------------|------------------------|------------------------|------------------------|--------------------------|---------------------|----------------------|---------|
|                  |      |                        |                        |                         |                        |                        |                        |                        |                        |                        |                          | 1                   | 2                    |         |
| Limkittikul [41] | 2006 | Thailand               | 0.040<br>(0.023-0.132) | 0.033<br>(0.012-0.046)  | 0.408<br>(0.017-0.966) | 0.066<br>(0.004-0.396) | 80<br>(35-80)          | 0.041<br>(0.009-0.193) | 0.009<br>(0.001-0.040) | 0.527<br>(0.027-0.976) | 0.159<br>(0.092-0.528)   | 2.86<br>(1.95-9.41) | 5.48<br>(3.13-20.1)  | -80483  |
|                  | 2007 |                        | 0.039<br>(0.026-0.062) | 0.052<br>(0.031-0.067)  | 0.345<br>(0.021-0.956) | 0.043<br>(0.003-0.146) | 80<br>(25-80)          | 0.028<br>(0.008-0.127) |                        |                        | 0.157<br>(0.105-0.249)   | 2.87<br>(2.14-4.37) | 5.52<br>(3.64-9.15)  | -112810 |
|                  | 2008 |                        | 0.036<br>(0.028-0.050) | 0.077<br>(0.055-0.092)  | 0.355<br>(0.027-0.969) | 0.029<br>(0.003-0.095) | 80<br>(35-80)          | 0.014<br>(0.004-0.080) |                        |                        | 0.145<br>(0.113-0.198)   | 2.72<br>(2.26-3.55) | 5.16<br>(3.96-7.22)  | -159451 |
|                  | 2009 |                        | 0.035<br>(0.025-0.054) | 0.047<br>(0.026-0.059)  | 0.318<br>(0.024-0.966) | 0.037<br>(0.004-0.165) | 80<br>(15-80)          | 0.017<br>(0.005-0.089) | 0.140<br>(0.101-0.217) | 2.67<br>(2.13-3.92)    | 5.05<br>(3.60-8.12)      | -103220             |                      |         |
|                  | 2010 |                        | 0.034<br>(0.027-0.044) | 0.101<br>(0.077-0.118)  | 0.348<br>(0.034-0.961) | 0.028<br>(0.004-0.074) | 80<br>(35-80)          | 0.009<br>(0.003-0.039) | 0.136<br>(0.107-0.174) | 2.68<br>(2.25-3.30)    | 5.10<br>(3.95-6.69)      | -215303             |                      |         |
| Wichmann [34]    | 2006 |                        | 0.046<br>(0.018-0.156) | 0.331<br>(0.155-0.921)  | 0.562<br>(0.040-0.981) | NA                     | 10<br>(5-15)           | 0.199<br>(0.005-0.865) | 0                      | 0                      | 0.184<br>(0.072-0.622)   | 1.41<br>(1.15-3.01) | 1.77<br>(1.20-8.56)  | -31     |
|                  | 2007 |                        | 0.073<br>(0.029-0.177) | 0.603<br>(0.360-0.964)  | 0.600<br>(0.032-0.984) | NA                     | 15<br>(5-15)           | 0.241<br>(0.013-0.904) |                        |                        | 0.292<br>(0.116-0.707)   | 1.79<br>(1.29-3.70) | 2.87<br>(1.44-11.33) | -114    |
| Bangkok^ [26]    | 2000 |                        | 0.047<br>(0.038-0.055) | 0.055<br>(0.052-0.058)  | 0.508<br>(0.020-0.974) | NA                     | 98<br>(98-98)          | 0.013<br>(0.006-0.032) | 0                      | 0                      | 0.188<br>(0.151-0.220)   | 3.30<br>(2.73-3.85) | 7.16<br>(5.47-8.74)  | -11467  |
| Ratchaburi^ [26] | 2000 |                        | 0.051<br>(0.042-0.058) | 0.109<br>(0.103-0.115)  | 0.502<br>(0.024-0.972) | NA                     | 98<br>(98-98)          | 0.012<br>(0.006-0.033) | 0                      | 0                      | 0.202<br>(0.169-0.231)   | 3.38<br>(2.91-3.81) | 6.61<br>(5.47-7.63)  | -2810   |
| Rayong [26]      | 2010 | 0.019<br>(0.016-0.022) | 0.155<br>(0.134-0.187) | 0.074<br>(0.062-0.088)  | NA                     | 28<br>(27-31)          | 0.000<br>(0.000-0.001) | 0.009<br>(0.001-0.040) | 0.527<br>(0.027-0.976) | 0.077<br>(0.064-0.089) | 1.73<br>(1.60-1.87)      | 2.56<br>(2.22-2.93) | -4115                |         |
| Ghouth [42]      | 2010 | Yemen                  | 0.005<br>(0.001-0.019) | 0.199<br>(0.052-0.959)  | 0.405<br>(0.033-0.968) | NA                     | 80<br>(15-80)          | 0.093<br>(0.016-0.463) | 0.224<br>(0.006-0.933) | 0.491<br>(0.025-0.982) | 0.015<br>(0.002-0.056)   | 1.13<br>(1.02-1.50) | 1.15<br>(1.02-1.68)  | -1792   |

\*Assumption1 = 4 infection, assumption 2 = 2 infections. ^All cases reported = DHF, we have assumed that all cases were due to secondary cases and fixed  $\gamma_1$  and  $\gamma_3 = 0$ .

Figures S4 and S5 show the distribution of the total force of infection ( $\lambda_{total}$ ) grouped by country (calculated by multiplying the serotype-specific force of infection by the number of serotypes in circulation) from models 1B (single reporting rate,  $\rho$ , fitted to cumulative incidence data) and 2B (age-dependent reporting rate,  $\rho_y$  and  $\rho_o$ , fitted to cumulative incidence data) respectively. Individual estimates are given in Table S5 and Table S6.

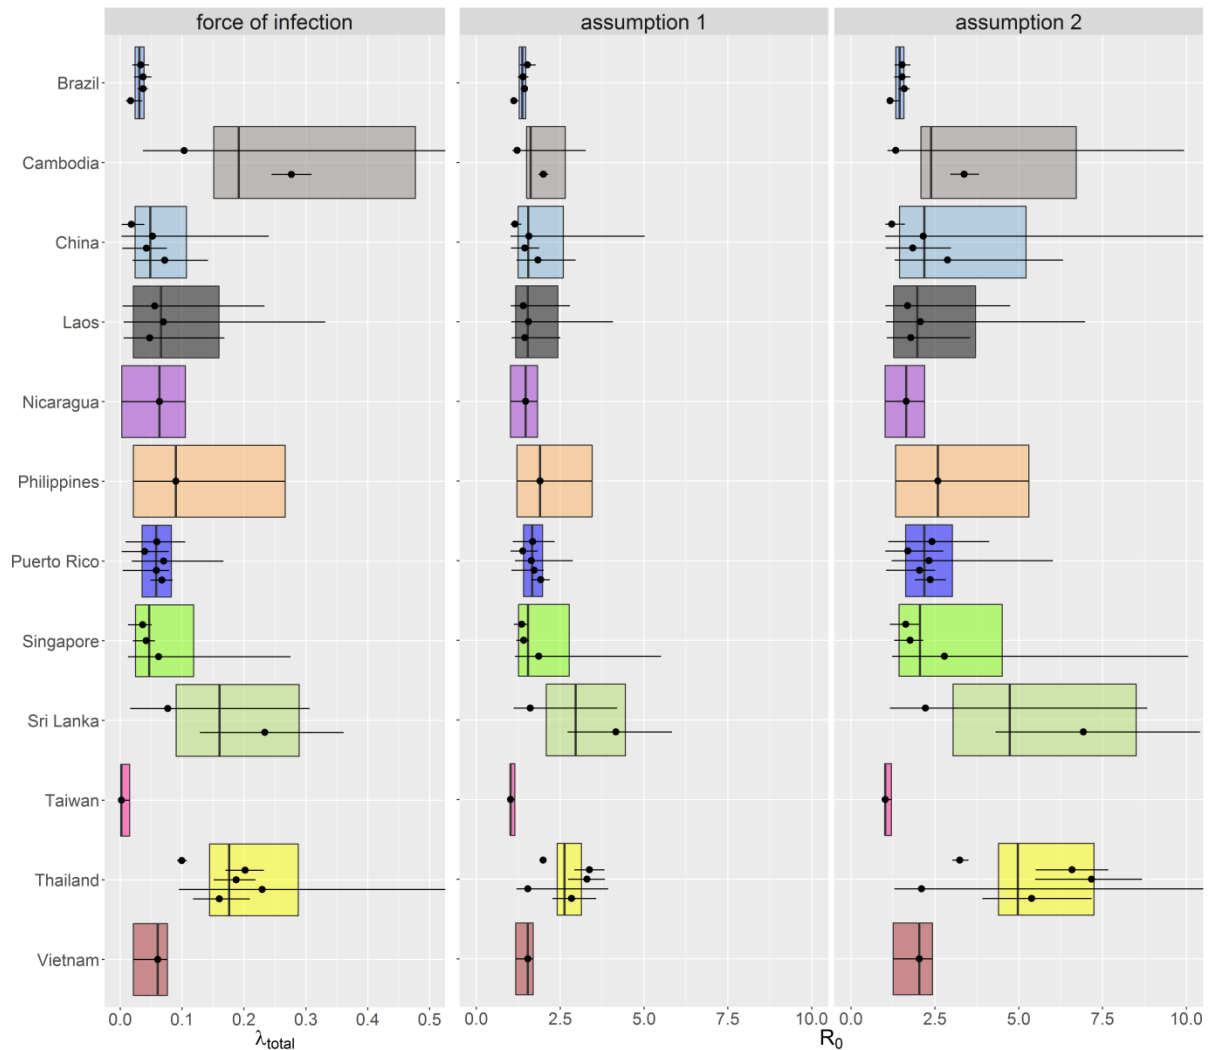

**Figure S4: Total force of infection and corresponding  $R_0$  estimates from model 1B (single reporting rate) and fitted to cumulative incidence data grouped by country. Each point represents the posterior median estimate and the error bars the 95% CrI. The box represents the country-specific central estimate calculated by taking the mean values of the MCMC output for each country (the line and limits of the box represents the posterior median and the 95% CrI respectively).**

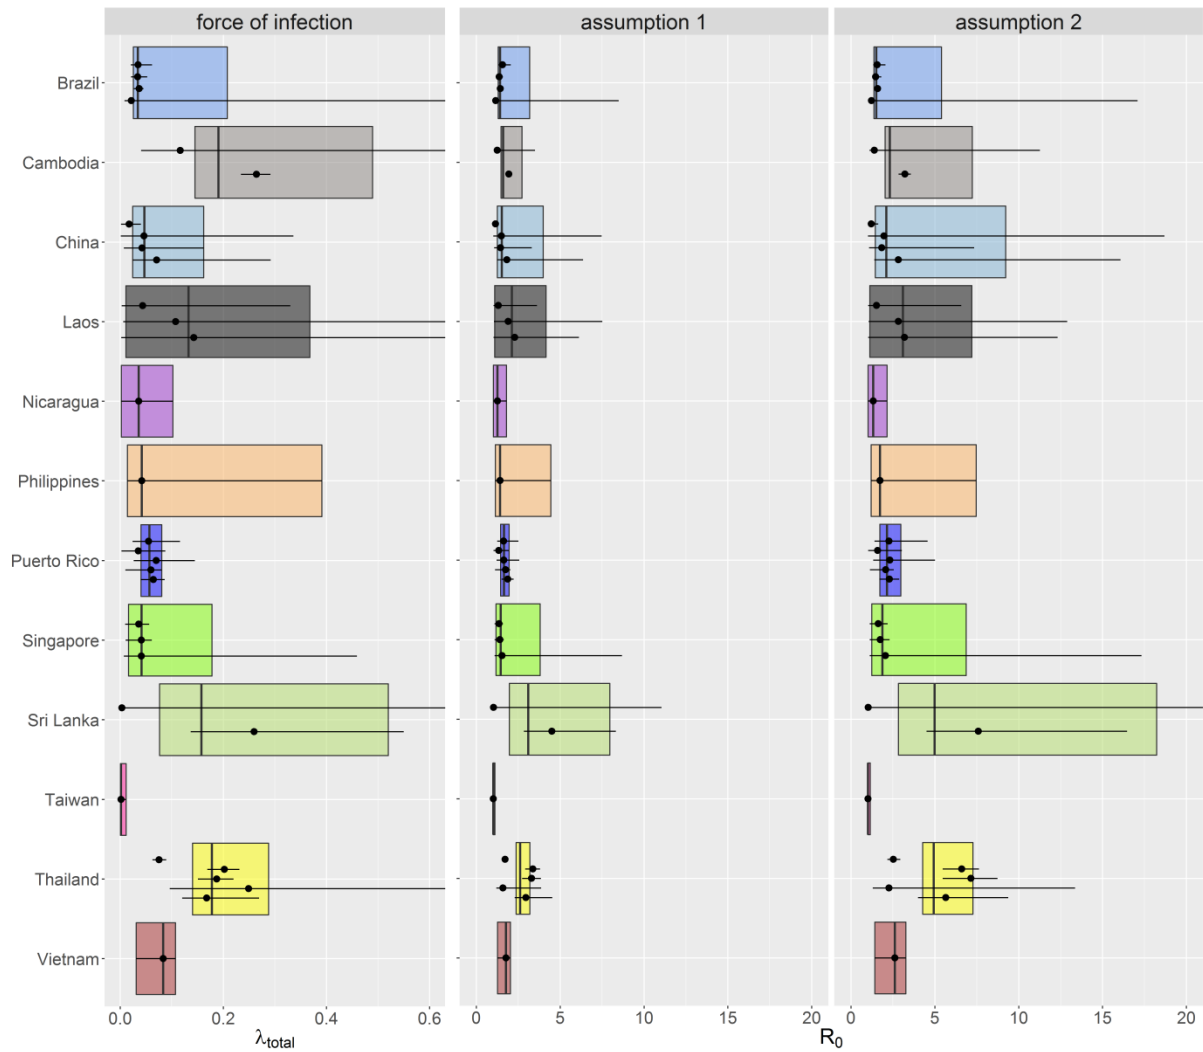

**Figure S5: Total force of infection and corresponding  $R_0$  estimates from model 2B (age-dependent reporting rate) and fitted to cumulative incidence data grouped by country. Each point represents the posterior median estimate and the error bars the 95% CrI. The box represents the country-specific central estimate calculated by taking the mean values of the MCMC output for each country (the line and limits of the box represents the posterior median and the 95% CrI respectively).**

**Table S5: Summary parameter estimates from model 1 fitted to cumulative incidence data where available by country (single reporting rate, model 1B).**

| Author [Ref]      | Year      | Country     | $\lambda$ (95% CrI)    | $\rho$ (95%CrI)        | $B$ (95%CrI)           | $\phi$ (95%CrI)        | $\gamma_1$ (95%CrI)    | $\gamma_3$ (95%CrI)    | $\lambda_{tot}$ (95%CrI) | $R_0$ (95%CrI)*     |                      | LnL     |
|-------------------|-----------|-------------|------------------------|------------------------|------------------------|------------------------|------------------------|------------------------|--------------------------|---------------------|----------------------|---------|
|                   |           |             |                        |                        |                        |                        |                        |                        |                          | 1                   | 2                    |         |
| Cordeiro [32]     | 1995/01   | Brazil      | 0.017<br>(0.010-0.023) | 0.552<br>(0.377-0.958) | NA                     | 0.008<br>(0.002-0.040) | 0.033<br>(0.003-0.119) | 0.494<br>(0.039-0.977) | 0.033<br>(0.020-0.047)   | 1.52<br>(1.30-1.77) | 1.52<br>(1.30-1.77)  | -355182 |
|                   | 2002/06   |             | 0.012<br>(0.008-0.017) | 0.485<br>(0.356-0.830) | NA                     | 0.007<br>(0.002-0.036) |                        |                        | 0.037<br>(0.023-0.051)   | 1.40<br>(1.24-1.56) | 1.53<br>(1.29-1.77)  | -326485 |
| Cardoso [16]      | 2000/09   |             | 0.012<br>(0.009-0.015) | 0.078<br>(0.064-0.104) | NA                     | 0.002<br>(0.001-0.008) |                        |                        | 0.037<br>(0.028-0.045)   | 1.44<br>(1.32-1.54) | 1.59<br>(1.42-1.75)  | -4333   |
| Penna [12]        | 2001/06   |             | 0.004<br>(0.002-0.009) | 0.428<br>(0.158-0.929) | 0.005<br>(0.001-0.035) | 0.023<br>(0.003-0.177) |                        |                        | 0.017<br>(0.009-0.036)   | 1.12<br>(1.06-1.26) | 1.16<br>(1.08-1.42)  | -55909  |
| Vong [33]         | 2006/08   | Cambodia    | 0.069<br>(0.061-0.077) | 0.179<br>(0.147-0.189) | NA                     | 0.003<br>(0.002-0.007) | 0.041<br>(0.002-0.239) | 0.378<br>(0.015-0.967) | 0.277<br>(0.245-0.309)   | 2.00<br>(1.86-2.15) | 3.37<br>(2.96-3.82)  | -55933  |
| Wichmann [34]     | 2006/07   |             | 0.026<br>(0.009-0.168) | 0.267<br>(0.103-0.946) | NA                     | 0.167<br>(0.005-0.906) |                        |                        | 0.104<br>(0.037-0.671)   | 1.22<br>(1.07-3.26) | 1.33<br>(1.09-9.94)  | -31     |
| Luo [45]          | 1978/88   | China       | 0.018<br>(0.005-0.035) | 0.000<br>(0.000-0.001) | 0.416<br>(0.065-0.745) | 0.002<br>(0.000-0.027) | 0.043<br>(0.003-0.312) | 0.505<br>(0.033-0.975) | 0.072<br>(0.0020-0.142)  | 1.83<br>(1.20-2.96) | 2.88<br>(1.30-6.32)  | -12911  |
|                   | 1989/99   |             | 0.011<br>(0.001-0.019) | 0.000<br>(0.000-0.001) | 0.049<br>(0.002-0.642) | 0.002<br>(0.000-0.025) |                        |                        | 0.042<br>(0.003-0.076)   | 1.45<br>(1.03-1.87) | 1.84<br>(1.04-2.98)  | -12430  |
|                   | 2000/09   |             | 0.013<br>(0.001-0.060) | 0.000<br>(0.000-0.001) | 0.263<br>(0.016-0.561) | 0.057<br>(0.016-0.267) |                        |                        | 0.052<br>(0.002-0.240)   | 1.57<br>(1.02-5.02) | 2.16<br>(1.02-12.31) | -4413   |
| Guo [46]          | 2005/11   |             | 0.004<br>(0.001-0.010) | 0.000<br>(0.000-0.005) | 0.006<br>(0.000-0.082) | 0.027<br>(0.009-0.110) |                        |                        | 0.018<br>(0.003-0.039)   | 1.15<br>(1.02-1.35) | 1.22<br>(1.02-1.61)  | -3459   |
| Anker[18]         | 2000/06   | Laos        | 0.012<br>(0.001-0.042) | 0.095<br>(0.040-0.359) | NA                     | 0.191<br>(0.005-0.921) | 0.182<br>(0.008-0.910) | 0.532<br>(0.028-0.974) | 0.048<br>(0.006-0.168)   | 1.45<br>(1.05-2.50) | 1.78<br>(1.06-3.55)  | -45133  |
| Khampongpane [43] | 2010      |             | 0.014<br>(0.001-0.058) | 0.150<br>(0.025-0.707) | 0.065<br>(0.002-0.871) | 0.067<br>(0.007-0.376) |                        |                        | 0.063<br>(0.004-0.233)   | 1.40<br>(1.03-2.79) | 1.69<br>(1.03-4.75)  | -33953  |
| Prasith [44]      | 2010      |             | 0.017<br>(0.001-0.083) | 0.143<br>(0.049-0.401) | 0.158<br>(0.005-0.903) | 0.293<br>(0.051-0.950) |                        |                        | 0.070<br>(0.006-0.331)   | 1.56<br>(1.04-4.08) | 2.07<br>(1.05-6.98)  | -22762  |
| Hammond [20]      | 1999/01   | Nicaragua   | 0.021<br>(0.001-0.035) | 0.026<br>(0.014-0.802) | NA                     | 0.014<br>(0.004-0.059) | 0.482<br>(0.032-0.968) | 0.505<br>(0.025-0.971) | 0.064<br>(0.002-0.105)   | 1.47<br>(1.02-1.82) | 1.64<br>(1.02-2.19)  | -1182   |
| Anker [18]        | 1998-2005 | Philippines | 0.023<br>(0.005-0.067) | 0.103<br>(0.049-0.268) | NA                     | 0.241<br>(0.019-0.939) | 0.365<br>(0.025-0.948) | 0.455<br>(0.025-0.968) | 0.090<br>(0.021-0.267)   | 1.90<br>(1.21-3.45) | 2.59<br>(1.33-5.30)  | -166118 |

\*Assumption 1: individuals can be infected up to four times. Assumption 2: individuals are immune after two infections.

**Table S5 continued (2/2)**

| Author [Ref]     | Year    | Country     | $\lambda$ (95%CrI)     | $\rho$ (95%CrI)        | $B$ (95%CrI)           | $\phi$ (95%CrI)         | $\gamma_1$ (95%CrI)    | $\gamma_3$ (95%CrI)    | $\lambda_{tot}$ (95%CrI) | $R_0$ (95%CrI)*     |                      | LnL      |
|------------------|---------|-------------|------------------------|------------------------|------------------------|-------------------------|------------------------|------------------------|--------------------------|---------------------|----------------------|----------|
|                  |         |             |                        |                        |                        |                         |                        |                        |                          | 1                   | 2                    |          |
| Rigau-Perez [35] | 1994    | Puerto Rico | 0.022<br>(0.016-0.028) | 0.346<br>(0.234-0.485) | NA                     | 0.005<br>(0.023-0.019)  | 0.417<br>(0.112-0.914) | 0.664<br>(0.052-0.984) | 0.067<br>(0.049-0.085)   | 1.92<br>(1.64-2.20) | 2.36<br>(1.91-2.82)  | -50388   |
|                  | 1995/97 |             | 0.020<br>(0.001-0.026) | 0.032<br>(0.021-0.587) | NA                     | 0.007<br>(0.001-0.178)  |                        |                        | 0.059<br>(0.004-0.079)   | 1.72<br>(1.05-2.01) | 2.04<br>(1.05-2.51)  | -9112    |
| Ramos [36]       | 2006    |             | 0.018<br>(0.005-0.042) | 0.359<br>(0.203-0.804) | NA                     | 0.046<br>(0.002-0.410)  |                        |                        | 0.070<br>(0.019-0.167)   | 1.64<br>(1.15-2.88) | 2.33<br>(1.21-6.03)  | -203     |
| Sharp [37]       | 2010    |             | 0.015<br>(0.002-0.026) | 0.161<br>(0.094-0.616) | NA                     | 0.029<br>(0.0011-0.102) |                        |                        | 0.059<br>(0.009-0.105)   | 1.68<br>(1.09-2.43) | 2.41<br>(1.11-4.12)  | -24291   |
| Tomashek [38]    | 2007    |             | 0.010<br>(0.001-0.020) | 0.053<br>(0.030-0.695) | NA                     | 0.026<br>(0.010-0.076)  |                        |                        | 0.040<br>(0.002-0.079)   | 1.38<br>(1.02-1.83) | 1.69<br>(1.02-2.75)  | -7042    |
| Anker [18]       | 1999/05 | Singapore   | 0.016<br>(0.003-0.069) | 0.134<br>(0.087-0.474) | NA                     | 0.323<br>(0.017-0.952)  | 0.056<br>(0.002-0.307) | 0.519<br>(0.026-0.975) | 0.062<br>(0.013-0.276)   | 1.86<br>(1.15-5.51) | 2.78<br>(1.22-10.06) | -16182   |
| Koh [39]         | 2005    |             | 0.011<br>(0.005-0.014) | 0.268<br>(0.212-0.465) | NA                     | 0.008<br>(0.003-0.040)  |                        |                        | 0.042<br>(0.020-0.056)   | 1.41<br>(1.19-1.57) | 1.77<br>(1.29-2.15)  | -20559   |
| Ler [23]         | 2005/07 |             | 0.009<br>(0.003-0.013) | 0.242<br>(0.181-0.646) | NA                     | 0.006<br>(0.00310.046)  |                        |                        | 0.036<br>(0.013-0.051)   | 1.36<br>(1.12-1.52) | 1.63<br>(1.16-2.03)  | -40149   |
| Anker [18]       | 1996/05 | Sri Lanka   | 0.019<br>(0.004-0.077) | 0.069<br>(0.037-0.156) | NA                     | 0.189<br>(0.004-0.911)  | 0.183<br>(0.014-0.669) | 0.440<br>(0.030-0.966) | 0.077<br>(0.016-0.306)   | 1.61<br>(1.12-4.20) | 2.22<br>(1.16-8.83)  | -16555   |
| Kulatilaka [40]  | 2010    |             | 0.058<br>(0.032-0.090) | 0.001<br>(0.000-0.001) | 0.058<br>(0.014-0.103) | 0.008<br>(0.003-0.028)  |                        |                        | 0.234<br>(0.129-0.361)   | 4.16<br>(2.725.83)  | 6.93<br>(4.31-10.41) | -1565    |
| Lin [25]         | 2003/09 | Taiwan      | 0.001<br>(0.000-0.004) | 0.135<br>(0.006-0.901) | NA                     | 0.010<br>(0.003-0.053)  | 0.034<br>(0.006-0.389) | 0.516<br>(0.019-0.980) | 0.002<br>(0.001-0.015)   | 1.02<br>(1.01-1.14) | 1.02<br>(1.01-1.20)  | -4241    |
| Limkittikul [41] | 2000/10 | Thailand    | 0.040<br>(0.030-0.052) | 0.060<br>(0.049-0.070) | 0.026<br>(0.006-0.065) | 0.015<br>(0.005-0.062)  | 0.018<br>(0.002-0.069) | 0.532<br>(0.030-0.978) | 0.160<br>(0.118-0.210)   | 2.84<br>(2.26-3.58) | 5.39<br>(3.92-7.18)  | -1387845 |
| Wichmann [34]    | 2006/07 |             | 0.057<br>(0.024-0.198) | 0.470<br>(0.351-0.945) | NA                     | 0.203<br>(0.013-0.907)  |                        |                        | 0.230<br>(0.095-0.790)   | 1.53<br>(1.20-3.94) | 2.10<br>(1.29-13.76) | -146     |
| Bangkok [26]     | 2000    |             | 0.047<br>(0.038-0.055) | 0.055<br>(0.052-0.058) | NA                     | 0.013<br>(0.006-0.029)  |                        |                        | 0.188<br>(0.151-0.219)   | 3.30<br>(2.73-3.84) | 7.17<br>(5.49-8.69)  | -11467   |
| Ratchaburi [26]  | 2000    |             | 0.050<br>(0.043-0.058) | 0.108<br>(0.103-0.115) | NA                     | 0.012<br>(0.005-0.033)  |                        |                        | 0.202<br>(0.170-0.232)   | 3.37<br>(2.92-3.82) | 6.59<br>(5.51-7.67)  | -2810    |
| Rayong [26]      | 2010    |             | 0.025<br>(0.023-0.027) | 0.113<br>(0.103-0.122) | NA                     | 0.001<br>(0.001-0.002)  |                        |                        | 0.099<br>(0.092-0.108)   | 1.99<br>(1.91-2.09) | 3.25<br>(3.02-3.50)  | -4128    |
| Cuong [30]       | 1998/09 | Vietnam     | 0.015<br>(0.005-0.019) | 0.024<br>(0.019-0.031) | NA                     | 0.010<br>(0.004-0.028)  | 0.045<br>(0.002-0.610) | 0.504<br>(0.021-0.979) | 0.061<br>(0.021-0.076)   | 1.53<br>(1.17-1.69) | 2.04<br>(1.26-2.43)  | -58901   |

\*Assumption 1: individuals can be infected up to four times. Assumption 2: individuals are immune after two infections.

**Table S6: Summary parameter estimates from model 2 fitted to cumulative incidence data by country (age-dependent reporting rate, model 2B).**

| Author [Ref]  | Year    | Country  | $\lambda$ (95%CrI)  | $\rho_{young}$ (95%CrI) | $\rho_{old}$ (95%CrI) | $\beta$ (95%CrI)    | Cutoff (95%CrI) | $\phi$ (95%CrI)     | $\gamma_1$ (95%CrI) | $\gamma_3$ (95%CrI) | $\lambda_{tot}$ (95%CrI) | $R_0$ (95%CrI)*  |                   | LnL     |
|---------------|---------|----------|---------------------|-------------------------|-----------------------|---------------------|-----------------|---------------------|---------------------|---------------------|--------------------------|------------------|-------------------|---------|
|               |         |          |                     |                         |                       |                     |                 |                     |                     |                     |                          | 1                | 2                 |         |
| Cordeiro [32] | 1995/01 | Brazil   | 0.018 (0.010-0.030) | 0.481 (0.163-0.943)     | 0.460 (0.096-0.931)   | NA                  | 65 (15-79)      | 0.007 (0.001-0.041) | 0.050 (0.003-0.178) | 0.491 (0.028-0.964) | 0.036 (0.021-0.062)      | 1.57 (1.32-2.05) | 1.57 (1.32-2.05)  | -355181 |
|               | 2002/06 |          | 0.012 (0.007-0.018) | 0.531 (0.319-0.958)     | 0.494 (0.059-0.923)   | NA                  | 65 (100-79)     | 0.006 (0.002-0.039) |                     |                     | 0.035 (0.021-0.053)      | 1.37 (1.22-1.58) | 1.48 (1.27-1.81)  | -326485 |
| Cardoso [16]  | 2000/09 |          | 0.012 (0.009-0.015) | 0.061 (0.015-0.119)     | 0.350 (0.025-0.973)   | NA                  | 90 (20-90)      | 0.002 (0.001-0.008) |                     |                     | 0.037 (0.027-0.046)      | 1.43 (1.30-1.55) | 1.58 (1.38-1.76)  | -4333   |
| Penna [12]    | 2001/06 |          | 0.006 (0.002-0.183) | 0.262 (0.004-0.910)     | 0.390 (0.046-0.968)   | 0.014 (0.001-0.613) | 50 (15-90)      | 0.040 (0.003-0.276) |                     |                     | 0.024 (0.009-0.734)      | 1.17 (1.06-8.49) | 1.25 (1.07-17.09) | -55911  |
| Vong [33]     | 2006/08 | Cambodia | 0.066 (0.059-0.073) | 0.183 (0.156-0.193)     | 0.051 (0.007-0.251)   | NA                  | 19 (14-21)      | 0.002 (0.001-0.005) | 0.036 (0.002-0.190) | 0.491 (0.028-0.964) | 0.265 (0.234-0.292)      | 1.94 (1.81-2.07) | 3.22 (2.84-3.58)  | -55927  |
| Wichmann [34] | 2006/07 |          | 0.030 (0.010-0.179) | 0.244 (0.078-0.931)     | 0.495 (0.038-0.960)   | NA                  | 15 (5-15)       | 0.183 (0.007-0.889) |                     |                     | 0.117 (0.041-0.715)      | 1.25 (1.08-3.50) | 1.40 (1.10-11.27) | -31     |
| Luo [45]      | 1978/88 | China    | 0.017 (0.006-0.073) | 0.001 (0.000-0.001)     | 0.486 (0.024-0.969)   | 0.378 (0.043-0.748) | 90 (90-90)      | 0.002 (0.001-0.024) | 0.051 (0.002-0.366) | 0.546 (0.031-0.981) | 0.071 (0.024-0.292)      | 1.82 (1.24-6.36) | 2.82 (1.39-16.07) | -12911  |
|               | 1989/99 |          | 0.011 (0.002-0.040) | 0.001 (0.000-0.001)     | 0.486 (0.032-0.975)   | 0.087 (0.002-0.701) | 90 (90-90)      | 0.003 (0.001-0.036) |                     |                     | 0.042 (0.007-0.162)      | 1.44 (1.07-3.30) | 1.84 (1.08-7.34)  | -12430  |
|               | 2000/09 |          | 0.012 (0.001-0.084) | 0.001 (0.00-0.008)      | 0.511 (0.024-0.978)   | 0.199 (0.002-0.550) | 90 (90-90)      | 0.052 (0.014-0.256) |                     |                     | 0.047 (0.001-0.336)      | 1.50 (1.01-7.48) | 1.98 (1.01-18.69) | -4413   |
| Guo [46]      | 2005/11 |          | 0.004 (0.001-0.010) | 0.001 (0.00-0.007)      | 0.487 (0.013-0.973)   | 0.007 (0.001-0.121) | 90 (90-90)      | 0.029 (0.009-0.104) |                     |                     | 0.018 (0.002-0.040)      | 1.15 (1.02-1.36) | 1.22 (1.02-1.63)  | -3459   |

\*Assumption 1: individuals can be infected up to four times. Assumption 2: individuals are immune after two infections.



**Table S6 continued (2/3).**

| Author [Ref]         | Year      | Country     | $\lambda$ (95%CrI)     | $\rho_{young}$ (95%CrI) | $\rho_{old}$ (95%CrI)  | $\beta$ (95%CrI)       | Cutoff (95%CrI) | $\phi$ (95%CrI)        | $\gamma_1$ (95%CrI)    | $\gamma_3$ (95%CrI)    | $\lambda_{tot}$ (95%CrI) | $R_0$ (95%CrI)*        |                      | LnL                  |        |
|----------------------|-----------|-------------|------------------------|-------------------------|------------------------|------------------------|-----------------|------------------------|------------------------|------------------------|--------------------------|------------------------|----------------------|----------------------|--------|
|                      |           |             |                        |                         |                        |                        |                 |                        |                        |                        |                          | 1                      | 2                    |                      |        |
| Anker [18]           | 2000/06   | Laos        | 0.036<br>(0.001-0.158) | 0.040<br>(0.010-0.949)  | 0.401<br>(0.066-0.955) | NA                     | 15<br>(5-15)    | 0.204<br>(0.004-0.908) | 0.223<br>(0.006-0.901) | 0.468<br>(0.039-0.971) | 0.143<br>(0.002-0.632)   | 2.29<br>(1.02-6.13)    | 3.19<br>(1.02-12.33) | -45134               |        |
| Khampa-pongpane [43] | 2010      |             | 0.011<br>(0.001-0.083) | 0.136<br>(0.016-0.862)  | 0.238<br>(0.050-0.885) | 0.055<br>(0.003-0.576) | 30<br>(5-40)    | 0.072<br>(0.007-0.432) |                        |                        |                          | 0.044<br>(0.003-0.330) | 1.31<br>(1.02-3.62)  | 1.52<br>(1.02-6.58)  | -33953 |
| Prasith [44]         | 2010      |             | 0.027<br>(0.002-0.176) | 0.083<br>(0.019-0.374)  | 0.426<br>(0.035-0.963) | 0.270<br>(0.009-0.937) | 80<br>(15-80)   | 0.348<br>(0.074-0.926) |                        |                        |                          | 0.108<br>(0.006-0.703) | 1.89<br>(1.04-7.51)  | 2.82<br>(1.05-12.89) | -22762 |
| Hammond [20]         | 1999/01   | Nicaragua   | 0.012<br>(0.001-0.034) | 0.051<br>(0.014-0.937)  | 0.407<br>(0.022-0.947) | NA                     | 55<br>(10-55)   | 0.017<br>(0.004-0.057) | 0.459<br>(0.030-0.972) | 0.488<br>(0.030-0.974) | 0.036<br>(0.002-0.102)   | 1.26<br>(1.01-1.80)    | 1.32<br>(1.01-2.15)  | -1183                |        |
| Anker [18]           | 1998-2005 | Philippines | 0.010<br>(0.004-0.098) | 0.277<br>(0.047-0.943)  | 0.188<br>(0.043-0.829) | NA                     | 15<br>(5-15)    | 0.301<br>(0.016-0.927) | 0.166<br>(0.015-0.336) | 0.428<br>(0.020-0.965) | 0.042<br>(0.014-0.391)   | 1.41<br>(1.14-4.45)    | 1.73<br>(1.20-7.46)  | -<br>166118          |        |
| Rigau-Perez [35]     | 1994      | Puerto Rico | 0.022<br>(0.013-0.029) | 0.456<br>(0.280-0.920)  | 0.506<br>(0.263-0.967) | NA                     | 55<br>(20-99)   | 0.003<br>(0.001-0.015) | 0.163<br>(0.006-0.605) | 0.560<br>(0.044-0.971) | 0.065<br>(0.040-0.087)   | 1.89<br>(1.51-2.24)    | 2.29<br>(1.70-2.88)  | -50387               |        |
|                      | 1995/97   |             | 0.020<br>(0.003-0.027) | 0.040<br>(0.026-0.526)  | 0.353<br>(0.030-0.968) | NA                     | 85<br>(30-85)   | 0.008<br>(0.003-0.173) |                        |                        |                          | 0.060<br>(0.010-0.080) | 1.74<br>(1.11-2.03)  | 2.07<br>(1.13-2.55)  | -9113  |
| Ramos [36]           | 2006      |             | 0.017<br>(0.007-0.036) | 0.460<br>(0.205-0.898)  | 0.470<br>(0.053-0.957) | NA                     | 40<br>(10-61)   | 0.034<br>(0.014-0.346) |                        |                        |                          | 0.070<br>(0.026-0.145) | 1.64<br>(1.21-2.56)  | 2.32<br>(1.33-5.01)  | -203   |
| Sharp [37]           | 2010      |             | 0.014<br>(0.006-0.030) | 0.197<br>(0.102-0.942)  | 0.238<br>(0.110-0.929) | NA                     | 50<br>(20-81)   | 0.019<br>(0.003-0.067) |                        |                        |                          | 0.055<br>(0.024-0.116) | 1.62<br>(1.25-2.51)  | 2.27<br>(1.41-4.56)  | -24289 |
| Tomashek [38]        | 2007      |             | 0.010<br>(0.001-0.022) | 0.089<br>(0.038-0.916)  | 0.218<br>(0.045-0.923) | NA                     | 60<br>(20-85)   | 0.022<br>(0.005-0.080) |                        |                        |                          | 0.035<br>(0.003-0.088) | 1.34<br>(1.02-1.94)  | 1.59<br>(1.02-3.03)  | -7041  |

\*Assumption 1: individuals can be infected up to four times. Assumption 2: individuals are immune after two infections.

Table S6 continued (3/3).

| Author [Ref]     | Year    | Country   | $\lambda$ (95%CrI)     | $\rho_{young}$ (95%CrI) | $\rho_{old}$ (95%CrI)  | $\beta$ (95%CrI)       | Cutoff (95%CrI) | $\phi$ (95%CrI)        | $\gamma_1$ (95%CrI)    | $\gamma_3$ (95%CrI)    | $\lambda_{tot}$ (95%CrI) | $R_o$ (95%CrI)*      |                      | LnL              |
|------------------|---------|-----------|------------------------|-------------------------|------------------------|------------------------|-----------------|------------------------|------------------------|------------------------|--------------------------|----------------------|----------------------|------------------|
|                  |         |           |                        |                         |                        |                        |                 |                        |                        |                        |                          | 1                    | 2                    |                  |
| Anker [18]       | 1999/05 | Singapore | 0.011<br>(0.002-0.115) | 0.201<br>(0.012-0.936)  | 0.239<br>(0.056-0.942) | NA                     | 15<br>(5-15)    | 0.312<br>(0.017-0.952) | 0.057<br>(0.002-0.458) | 0.564<br>(0.032-0.970) | 0.041<br>(0.007-0.459)   | 1.54<br>(1.09-8.69)  | 2.05<br>(1.12-17.32) | -16182           |
| Koh [39]         | 2005    |           | 0.010<br>(0.003-0.015) | 0.267<br>(0.186-0.854)  | 0.375<br>(0.090-0.917) | NA                     | 65<br>(25-85)   | 0.008<br>(0.002-0.047) |                        |                        | 0.042<br>(0.011-0.061)   | 1.40<br>(1.09-1.63)  | 1.74<br>(1.12-2.30)  | -20560           |
| Ler [23]         | 2005/07 |           | 0.009<br>(0.002-0.014) | 0.242<br>(0.152-0.721)  | 0.344<br>(0.031-0.945) | NA                     | 80<br>(15-80)   | 0.006<br>(0.001-0.057) |                        |                        | 0.036<br>(0.010-0.056)   | 1.35<br>(1.09-1.58)  | 1.63<br>(1.11-2.19)  | -40150           |
| Anker [18]       | 1996/05 | Sri Lanka | 0.001<br>(0.000-0.186) | 0.159<br>(0.001-0.950)  | 0.121<br>(0.006-0.766) | NA                     | 15<br>(5-15)    | 0.225<br>(0.011-0.907) | 0.272<br>(0.25-0.899)  | 0.515<br>(0.031-0.973) | 0.004<br>(0.001-0.744)   | 1.02<br>(1.00-11.04) | 1.03<br>(1.00-27.67) | -16555           |
| Kulatilaka [40]  | 2010    |           | 0.065<br>(0.034-0.137) | 0.001<br>(0.001-0.001)  | 0.501<br>(0.007-0.974) | 0.086<br>(0.026-0.394) | 65<br>(65-65)   | 0.009<br>(0.003-0.039) |                        |                        | 0.260<br>(0.137-0.550)   | 4.51<br>(2.83-8.32)  | 7.60<br>(4.51-16.46) | -1566            |
| Lin [25]         | 2003/09 | Taiwan    | 0.001<br>(0.000-0.003) | 0.186<br>(0.008-0.933)  | 0.411<br>(0.031-0.961) | NA                     | 75<br>(15-85)   | 0.010<br>(0.003-0.053) | 0.036<br>(0.005-0.387) | 0.514<br>(0.031-0.969) | 0.002<br>(0.001-0.011)   | 1.01<br>(1.01-1.11)  | 1.02<br>(1.01-1.14)  | -4241            |
| Limkittikul [41] | 200./10 | Thailand  | 0.042<br>(0.030-0.067) | 0.051<br>(0.035-0.068)  | 0.354<br>(0.022-0.974) | 0.053<br>(0.011-0.137) | 80<br>(15-80)   | 0.023<br>(0.006-0.105) | 0.022<br>(0.002-0.065) | 0.546<br>(0.024-0.978) | 0.168<br>(0.120-0.269)   | 2.95<br>(2.29-4.52)  | 5.66<br>(3.99-9.38)  | -<br>138784<br>6 |
| Wichmann [34]    | 2006/07 |           | 0.062<br>(0.024-0.195) | 0.465<br>(0.278-0.944)  | 0.588<br>(0.037-0.985) | NA                     | 10<br>(5-15)    | 0.176<br>(0.006-0.902) |                        |                        | 0.249<br>(0.096-0.779)   | 1.59<br>(1.20-3.87)  | 2.26<br>(1.30-13.37) | -146             |
| Cuong [30]       | 1998/09 | Vietnam   | 0.021<br>(0.008-0.027) | 0.011<br>(0.005-0.056)  | 0.025<br>(0.017-0.815) | NA                     | 15<br>(15-79)   | 0.003<br>(0.001-0.021) | 0.057<br>(0.002-0.270) | 0.543<br>(0.038-0.982) | 0.084<br>(0.031-0.107)   | 1.76<br>(1.26-2.02)  | 2.61<br>(1.42-3.27)  | -58897           |

The baseline reporting rate ( $\rho$ ), which is defined as the probability of detecting a secondary infection, was 10% (range: 1% - 79%) and 16% (range: 1%-55%) when fitted to yearly and cumulative incidence data respectively, assuming a single reporting rate for all ages. When we allowed for age-dependent reporting rates, estimates of  $\rho$  increased to between 26% - 33% and 13% - 37% when fitted to yearly and cumulative incidence data respectively. Figure S4 shows the dataset-specific estimates of the baseline reporting rate ( $\rho$ ,  $\rho_{young}$ , and  $\rho_{old}$ ) and the probability of detecting a primary ( $\gamma_1$ ) case relative to the baseline reporting rate, and the probability of detecting a tertiary/quaternary ( $\gamma_3$ ) case relative to a primary case by model type. The probability of detecting a primary case relative to a secondary case was consistently low at less than 25% for the majority of data sets and models.

When we allowed for reporting rates to vary by age, we found that the median probability that a secondary infection was detected was higher in older compared with younger individuals (Figure S5). However, stratifying parameter estimates by country, when  $\rho_{old}$  was higher than  $\rho_{young}$  the corresponding estimate of the age threshold at which reporting rates changed ( $A_{threshold}$ ) were high (Figure S5, Table S4 and Table S6). In such cases the reporting rate  $\rho_{young}$  applied to the majority of age groups and the estimated values were comparable to the corresponding baseline reporting rates estimated from the model variants which did not incorporate age-dependent reporting.

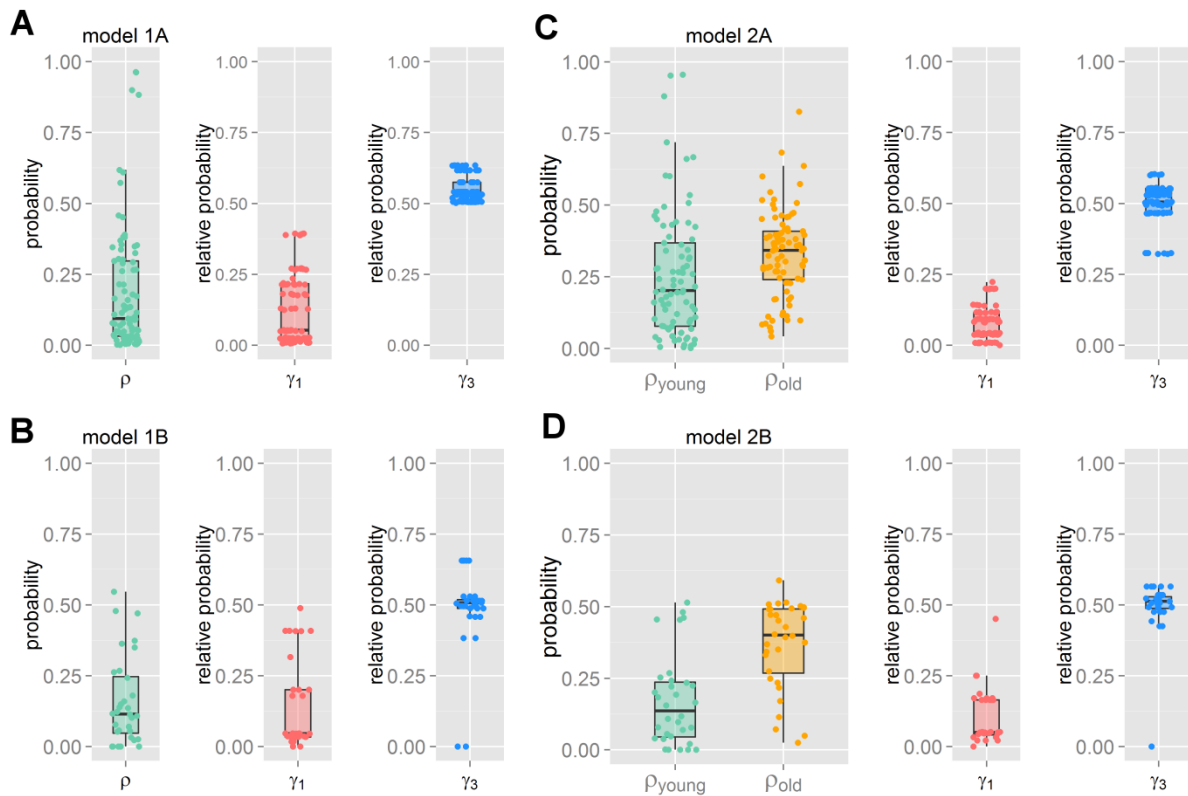

**Figure S4: Boxplots of estimated reporting rates by model type: A) model 1A, B) model 1B, C) model 2A and D) model 2B. Each point represents the posterior median estimate for one dataset.  $\rho$ ,  $\rho_{young}$ ,  $\rho_{old}$  = baseline reporting rate or probability of detecting a secondary infection for all ages, individuals younger than cut off, and individuals older than the cut off age respectively.  $\gamma_1$  = probability of detecting a primary infection relative to a secondary infection, and  $\gamma_3$  = probability of detecting a tertiary/quaternary infection relative to a primary infection. Models 1A and 1B were fitted to yearly and cumulative incidence data respectively assuming a non-age dependent reporting rate, while models 2A and 2B were fitted to yearly and cumulative incidence data respectively assuming an age-dependent reporting rate.**

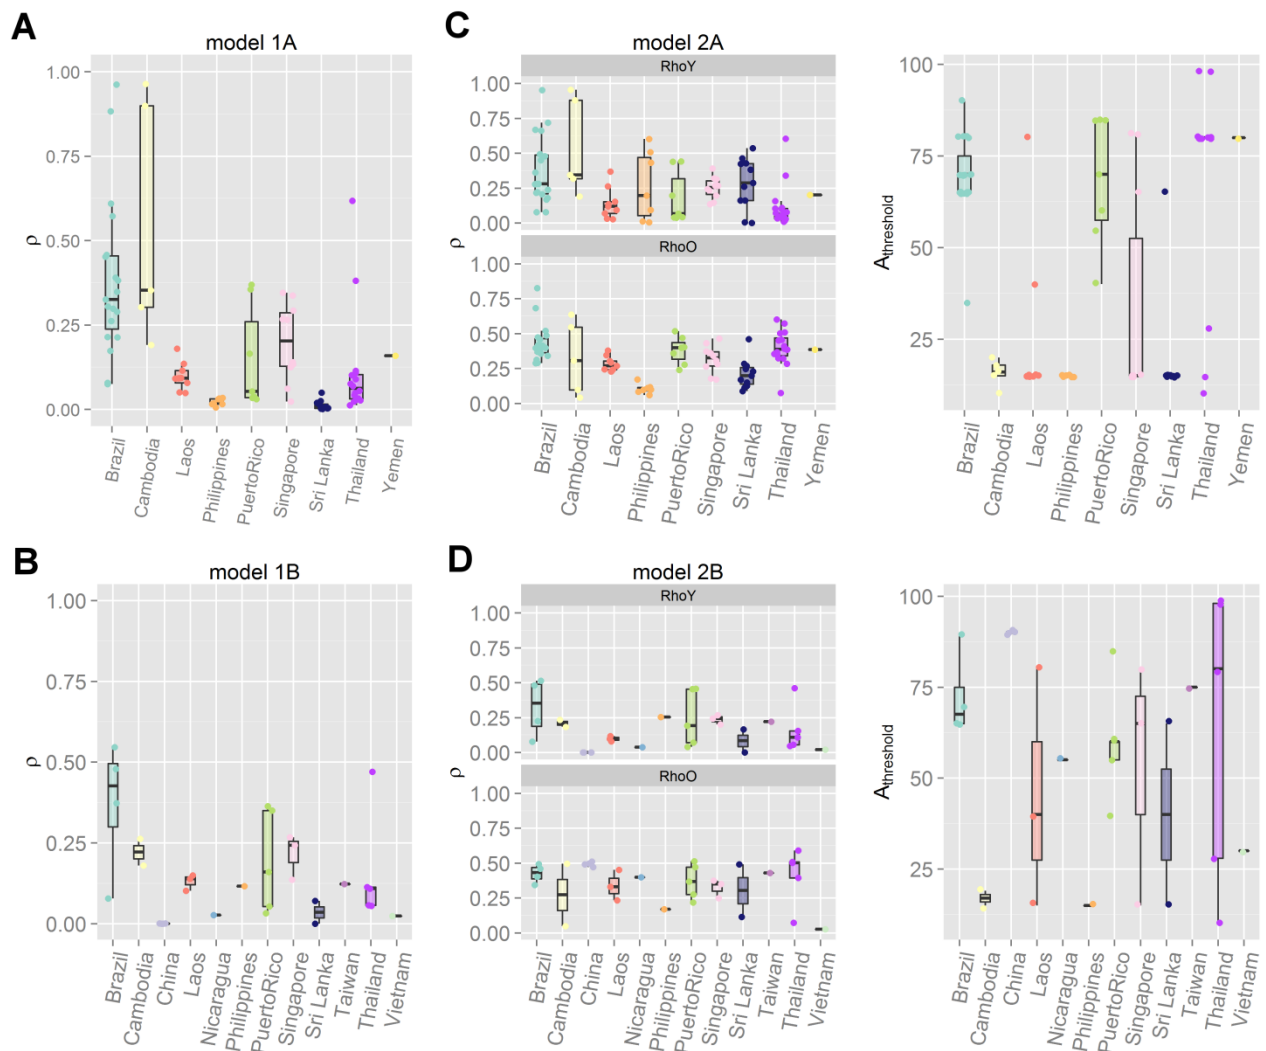

**FigureS5: Comparison of baseline reporting rates ( $\rho$ ,  $\rho_y$ ,  $\rho_o$ ) and estimated age (years) at which reporting rates change ( $A_{threshold}$ ) by model. A) Model 1A, with single reporting rate fitted to yearly incidence data, B) model 1B, with single reporting rate fitted to cumulative incidence data, C) model 2A, with age-dependent reporting rate fitted to yearly incidence data, and D) model 2B, with age-dependent reporting rate fitted to cumulative incidence data. Each point represents the posterior median estimate for one dataset.**

The baseline reporting rates  $\rho$  (Figure S5) varied substantially by country, likely reflecting differences in healthcare seeking behaviour and surveillance.

Comparing models fitted to yearly incidence and cumulative incidence data, models 2 provided a better fit to the data 62% and 59% of the time respectively, as assessed by the DIC (Table S7 and Table S8).

## 2.2 DIC Comparison

**Table S7: Summary DIC comparison of model fits to yearly incidence data. Models 1 (single reporting rate) and 2 (age-dependent reporting rate) fitted to yearly incidence data. Smaller DIC for each dataset is highlighted in bold where the difference is greater than 5.**

| Author [Ref]        | Year       | Number of serotypes | Country      | DIC          |               |              |       |
|---------------------|------------|---------------------|--------------|--------------|---------------|--------------|-------|
|                     |            |                     |              | Model 1      | Model 2       |              |       |
| Cordeiro [32]       | 1995       | 2                   | Brazil       | 35710        | <b>35703</b>  |              |       |
|                     | 1996       | 2                   |              | 80771        | 80769         |              |       |
|                     | 1997       | 2                   |              | 115423       | <b>115414</b> |              |       |
|                     | 1998       | 2                   |              | 186560       | <b>186511</b> |              |       |
|                     | 1999       | 2                   |              | 128229       | <b>128227</b> |              |       |
|                     | 2000       | 3                   |              | 101163       | 101163        |              |       |
|                     | 2001       | 3                   |              | 62048        | <b>62035</b>  |              |       |
|                     | 2002       | 3                   |              | 418449       | 418448        |              |       |
|                     | 2003       | 3                   |              | 95070        | <b>94633</b>  |              |       |
|                     | 2004       | 3                   |              | 23166        | 23163         |              |       |
|                     | 2005       | 3                   |              | 47099        | 47095         |              |       |
|                     | 2006       | 3                   |              | 68804        | <b>68797</b>  |              |       |
|                     | Penna [12] | 2001                |              | 4            |               | <b>27771</b> | 28830 |
|                     |            | 2002                |              | 4            |               | <b>13788</b> | 17822 |
| 2003                |            | 4                   | <b>20633</b> | 20681        |               |              |       |
| 2004                |            | 4                   | <b>3032</b>  | 10996        |               |              |       |
| 2005                |            | 4                   | <b>16643</b> | 16998        |               |              |       |
| 2006                |            | 4                   | <b>15566</b> | 15592        |               |              |       |
| Vong [33]           | 2006       | 4                   | Cambodia     | 41711        | 41710         |              |       |
|                     | 2007       | 4                   |              | 221410       | <b>221390</b> |              |       |
|                     | 2008       | 4                   |              | 68562        | <b>68544</b>  |              |       |
|                     | 2006       | 4                   |              | 65           | 65            |              |       |
| Wichmann [34]       | 2007       | 4                   |              | 1088         | 1087          |              |       |
|                     | 2007       | 4                   |              | 1088         | 1087          |              |       |
| Anker [18]          | 2000       | 4                   | Laos         | 2104         | <b>2055</b>   |              |       |
|                     | 2001       | 4                   |              | 7257         | <b>6585</b>   |              |       |
|                     | 2002       | 4                   |              | 16365        | <b>15530</b>  |              |       |
|                     | 2003       | 4                   |              | 34578        | <b>32495</b>  |              |       |
|                     | 2004       | 4                   |              | 6557         | <b>4009</b>   |              |       |
|                     | 2005       | 4                   |              | 10482        | <b>9734</b>   |              |       |
|                     | 2006       | 4                   |              | 11876        | <b>10165</b>  |              |       |
| Khampapongpane [43] | 2010       | 4                   |              | <b>64888</b> | 67566         |              |       |
| Prasith [44]        | 2010       | 4                   |              | 45456        | <b>44129</b>  |              |       |
| Anker [18]          | 1998       | 4                   | Philippines  | 67732        | <b>65607</b>  |              |       |
|                     | 1999       | 4                   |              | 18300        | <b>11191</b>  |              |       |
|                     | 2001       | 4                   |              | <b>47633</b> | 47674         |              |       |
|                     | 2002       | 4                   |              | 32395        | <b>32374</b>  |              |       |
|                     | 2003       | 4                   |              | 57113        | <b>53741</b>  |              |       |
|                     | 2004       | 4                   |              | <b>44004</b> | 44018         |              |       |
| Rigau-Perez [35]    | 2005       | 3                   | Puerto Rico  | 64390        | <b>64353</b>  |              |       |
|                     | 1994       | 3                   |              | 100776       | <b>100727</b> |              |       |
|                     | 1995       | 3                   |              | 6127         | 6128          |              |       |
|                     | 1996       | 3                   |              | 5393         | 5396          |              |       |
|                     | 1997       | 4                   |              | <b>6742</b>  | 6747          |              |       |
|                     | Ramos [36] | 2006                |              | 4            | 409           | 409          |       |
|                     | Sharp [37] | 2007                |              | 4            | <b>48497</b>  | 48514        |       |
| Tomashek [38]       | 2010       | 4                   |              | 14076        | <b>14014</b>  |              |       |
| Anker [18]          | 1999       | 4                   | Singapore    | 1041         | <b>785</b>    |              |       |
|                     | 2000       | 4                   |              | 725          | <b>474</b>    |              |       |
|                     | 2001       | 4                   |              | 1879         | <b>690</b>    |              |       |
|                     | 2002       | 4                   |              | 3013         | <b>917</b>    |              |       |
|                     | 2003       | 4                   |              | 3719         | <b>1133</b>   |              |       |
|                     | 2004       | 4                   |              | 8270         | <b>7606</b>   |              |       |
|                     | 2005       | 4                   |              | 13714        | <b>13514</b>  |              |       |
| Koh [39]            | 2005       | 4                   |              | 41122        | 41121         |              |       |
| Ler [23]            | 2005       | 4                   |              | 50174        | 50175         |              |       |
|                     | 2007       | 4                   |              | 29440        | 29440         |              |       |

**Table S7 continued (2/2).**

| Author           | Year | # serotypes | Country   | DIC           |             |      |
|------------------|------|-------------|-----------|---------------|-------------|------|
|                  |      |             |           | Model 1       | Model 2     |      |
| Anker [18]       | 1996 | 4           | Sri Lanka | 2279          | <b>1967</b> |      |
|                  | 1997 | 4           |           | 1621          | 1621        |      |
|                  | 1998 | 4           |           | <b>1980</b>   | 2210        |      |
|                  | 1999 | 4           |           | 2350          | <b>1800</b> |      |
|                  | 2000 | 4           |           | 4605          | <b>3594</b> |      |
|                  | 2001 | 4           |           | <b>4422</b>   | 4672        |      |
|                  | 2002 | 4           |           | 4509          | <b>3736</b> |      |
|                  | 2003 | 4           |           | 2426          | 2425        |      |
|                  | 2004 | 4           |           | 5722          | <b>1706</b> |      |
|                  | 2005 | 4           |           | 1763          | <b>1738</b> |      |
| Kulatilaka [40]  | 1997 | 4           |           |               | <b>3124</b> | 3138 |
| Limkittikul [41] | 2000 | 4           | Thailand  | <b>58282</b>  | 59755       |      |
|                  | 2001 | 4           |           | <b>450738</b> | 451213      |      |
|                  | 2002 | 4           |           | <b>371748</b> | 376250      |      |
|                  | 2003 | 4           |           | <b>206304</b> | 214588      |      |
|                  | 2004 | 4           |           | <b>124400</b> | 133462      |      |
|                  | 2005 | 4           |           | <b>157060</b> | 159895      |      |
|                  | 2006 | 4           |           | <b>156750</b> | 160942      |      |
|                  | 2007 | 4           |           | <b>225396</b> | 225623      |      |
|                  | 2008 | 4           |           | <b>318403</b> | 318907      |      |
|                  | 2009 | 4           |           | <b>190752</b> | 206441      |      |
|                  | 2010 | 4           |           | <b>430542</b> | 430608      |      |
| Wichmann [34]    | 2006 | 4           |           |               | 64          | 64   |
|                  | 2007 | 4           |           |               | 227         | 228  |
| Bangkok [26]     | 2000 | 4           |           | 22938         | 22939       |      |
| Ratchaburi [26]  | 2000 | 4           |           | 5624          | 5624        |      |
| Rayong [26]      | 2010 | 4           |           | 8259          | <b>8236</b> |      |
| Ghouth [42]      | 2010 | 3           | Yemen     | 3582          | <b>3576</b> |      |

**Table S8: Summary DIC comparison of model fits to cumulative incidence data. Models 1 (single reporting rate) and 2 (age-dependent reporting rate) fitted to cumulative incidence data. Smaller DIC for each dataset is highlighted in bold where the difference is greater than 5.**

| Author           | Year    | Country     | Model 1       | Model 2       |
|------------------|---------|-------------|---------------|---------------|
| Cordeiro [32]    | 1995/01 | Brazil      | 710366        | <b>710318</b> |
|                  | 2002/06 |             | <b>652964</b> | 652966        |
| Cardoso [16]     | 2000/09 |             | <b>8670</b>   | 8671          |
| Penna [12]       | 2001/06 |             | 111819        | <b>111696</b> |
| Vong [33]        | 2006/08 | Cambodia    | 111870        | <b>111861</b> |
| Wichmann [34]    | 2006/07 |             | 64            | 64            |
| Luo [45]         | 1978/88 | China       | 25826         | 25826         |
|                  | 1989/99 |             | <b>23810</b>  | 24861         |
|                  | 2000/09 |             | 8823          | <b>8818</b>   |
| Guo [46]         | 2005/11 |             | 6914          | <b>6895</b>   |
| Anker [18]       | 2000/06 | Laos        | 90188         | <b>58722</b>  |
| Hammond [20]     | 1995/97 | Nicaragua   | 2358          | <b>2335</b>   |
| Anker [18]       | 1998/05 | Philippines | <b>332153</b> | 331296        |
| Rigau-Perez [35] | 1994    | Puerto Rico | 100773        | <b>100697</b> |
|                  | 1995/97 |             | <b>18219</b>  | 18231         |
| Anker [18]       | 1999/05 | Singapore   | 32360         | <b>26429</b>  |
| Ler [23]         | 2005/07 |             | 80303         | 80304         |
| Anker [18]       | 1996/05 | Sri Lanka   | 33110         | <b>29570</b>  |
| Lin [25]         | 2003/09 | Taiwan      | 8458          | 8434          |
| Limkittikul [41] | 2000/10 | Thailand    | 2775619       | 2775687       |
| Wichmann [34]    | 2006/07 |             | 292           | 289           |
| Cuong [30]       | 1998/09 | Vietnam     | 117807        | 117801        |



### 2.3 Comparison of estimates obtained from seroprevalence and incidence data.

We used weighted regression to compare the force of infection estimates obtained from age-stratified seroprevalence data to cumulative incidence data. Estimates obtained from the model fitted to the cumulative incidence data assuming a single reporting rate (Model 1B) were comparable to force of infection estimates from seroprevalence data. The majority of the total force of infection ( $\lambda_{total}$ ) estimates from incidence data (calculated by multiplying the serotype-specific force of infection by the number of serotypes in circulation) were comparable for both models to those obtained from seroprevalence data when  $\lambda_{total}$  was smaller than  $\sim 0.1$ , with greater uncertainty as force of infection increases (Figure S7). The estimates from model 2B (age-dependent reporting rates) produced very similar estimates.

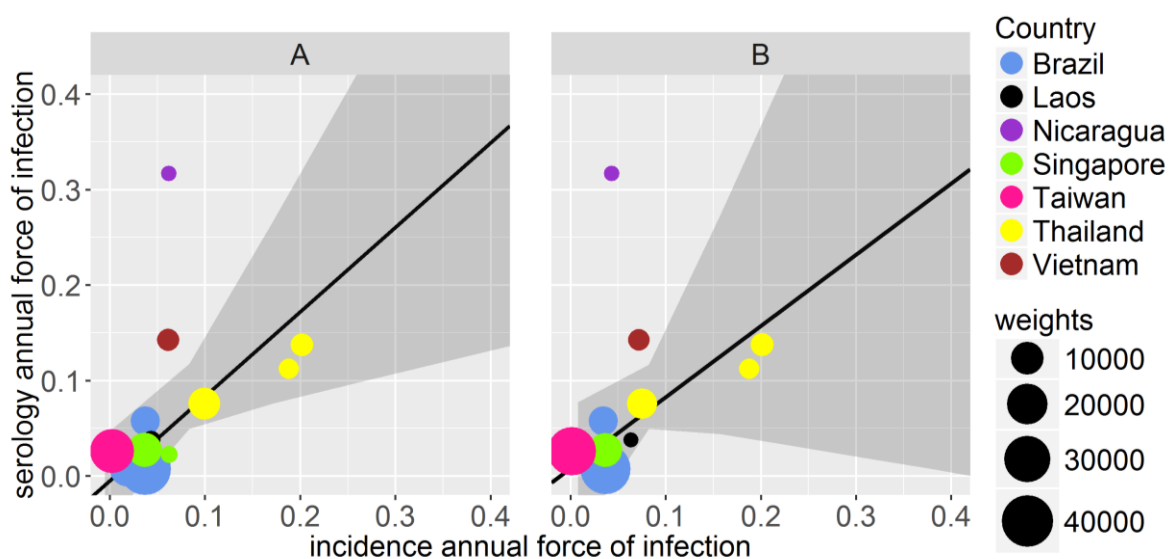

**Figure S6: Comparison of weighted deming regression of force of infection estimates by country from cumulative incidence data and seroprevalence data for A) model 1B (non-age dependent reporting) and B) model 2B (age-dependent reporting rate). Each point is weighted depending on the error in both serology and incidence estimates, represented by the size of circles (larger circles indicating greater weight i.e. smaller error). See Table S2 for summary of matched datasets.**

For the three locations in Thailand where region and time matching seroprevalence and incidence data were available [26], the force of infection estimates obtained from the models fitted to incidence data were comparable except for Ratchaburi where the estimate obtained from seroprevalence data was larger than that from incidence data (Figure S7).

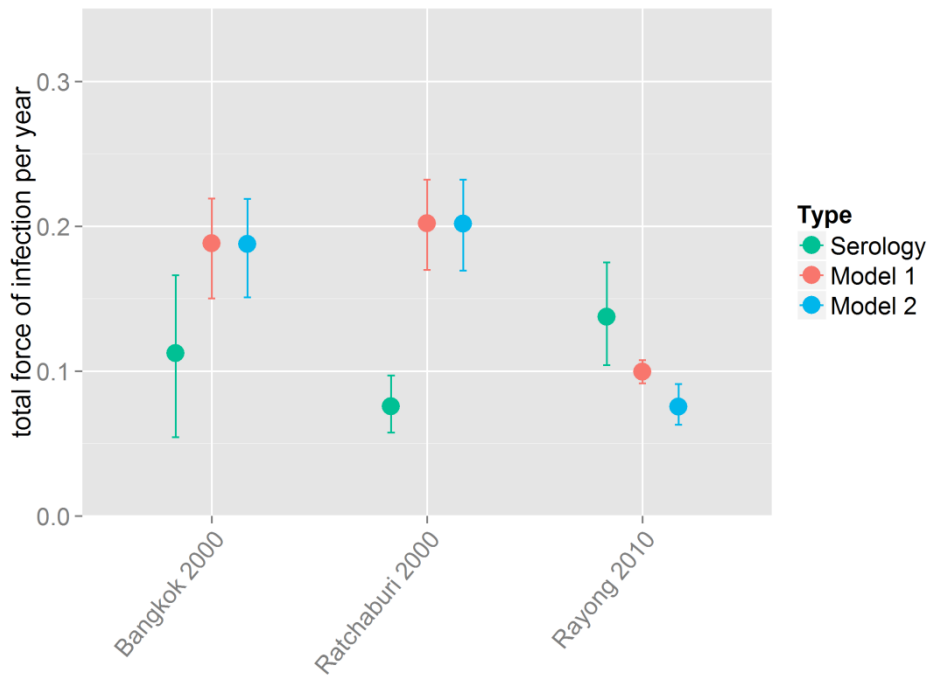

**Figure S7 Comparison of force of infection estimates derived from incidence data and seroprevalence data. Comparison of posterior median estimates and 95% CrI of the total force of infection from Models 1 (single reporting rate) and 2 (age-dependent reporting rate) fitted to incidence data and model A (as described in [4]) to age-stratified seroprevalence data from Thailand where incidence and serology data were available from the same year and location .**

## 2.4 Model Fits by country

**Fig S8: Model fits of models 1 (single reporting rate) and 2 (age-dependent reporting rate) fitted to yearly incidence data from Brazil (Cordeiro *et al*). 95% exact confidence intervals shown around data points, posterior median (line) and 95% credible interval (shaded area) shown.**

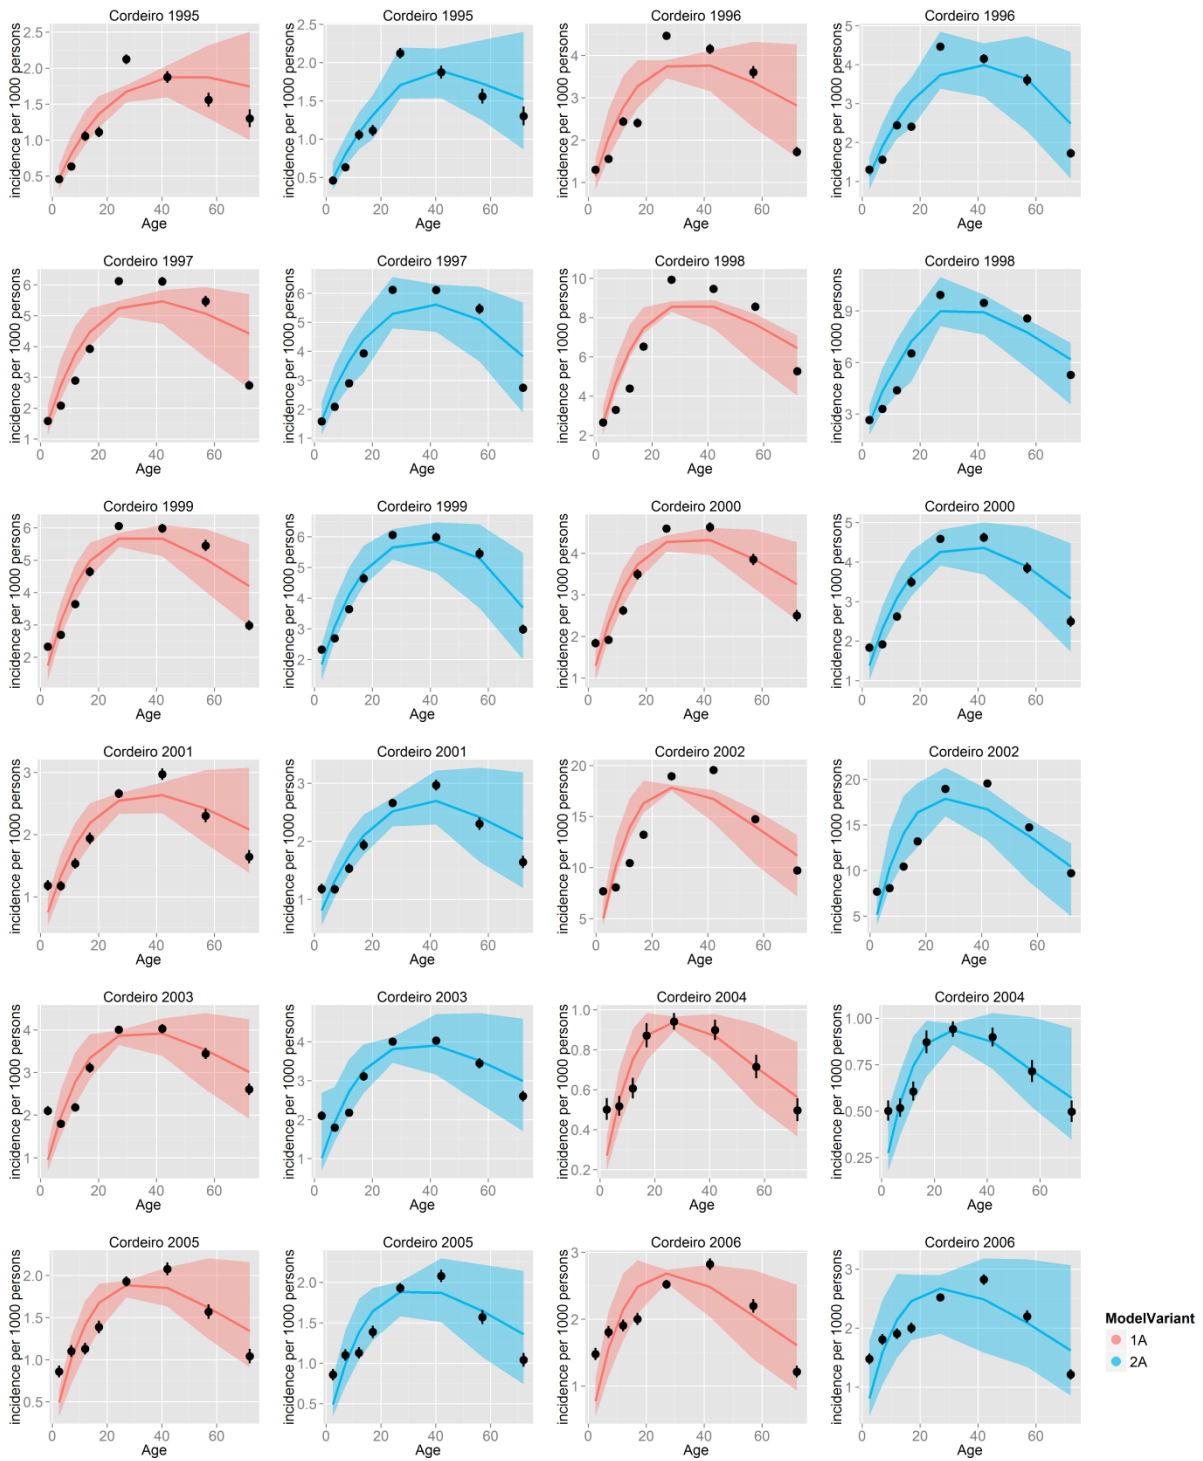

**Fig S9: Model fits of models 1 (single reporting rate) and 2 (age-dependent reporting rate) fitted to yearly incidence data from Brazil (Penna *et al*). 95% exact confidence intervals shown around data points, posterior median (line) and 95% credible interval (shaded area) shown.**

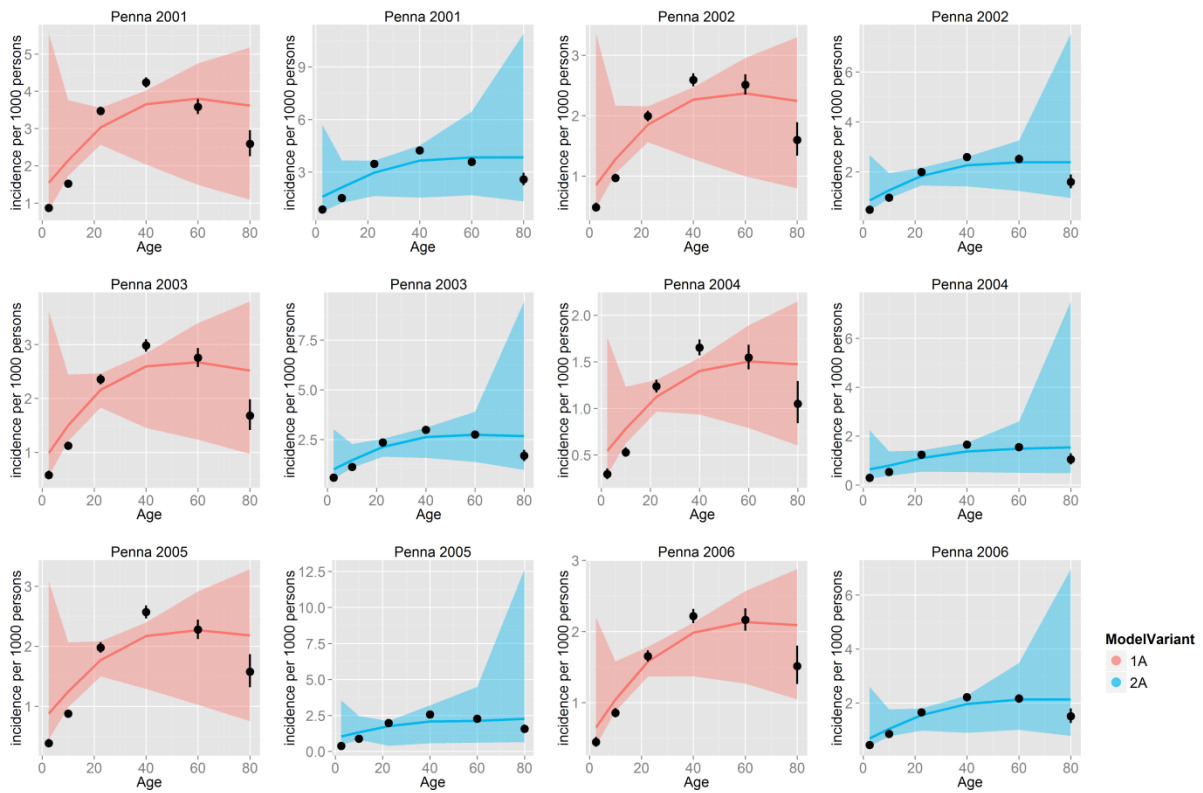

**Fig S10: Model fits of model 1 (single reporting rate) and 2 (age-dependent reporting rate) fitted to cumulative incidence data from Brazil. 95% exact confidence interval around data points, posterior median (line) and 95% credible interval (shaded area) shown.**

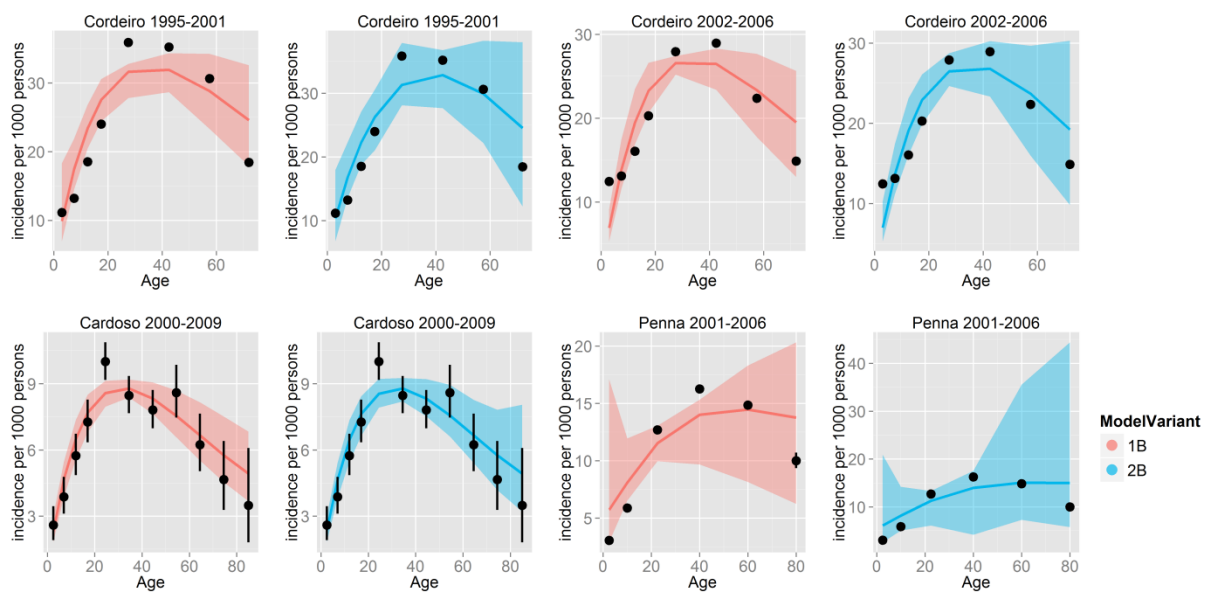

**Fig S11: Model fits of models 1 (single reporting rate) and 2 (age-dependent reporting rate) fitted to yearly incidence data from Cambodia. 95% exact confidence interval around data points, posterior median (line) and 95% credible interval (shaded area) shown.**

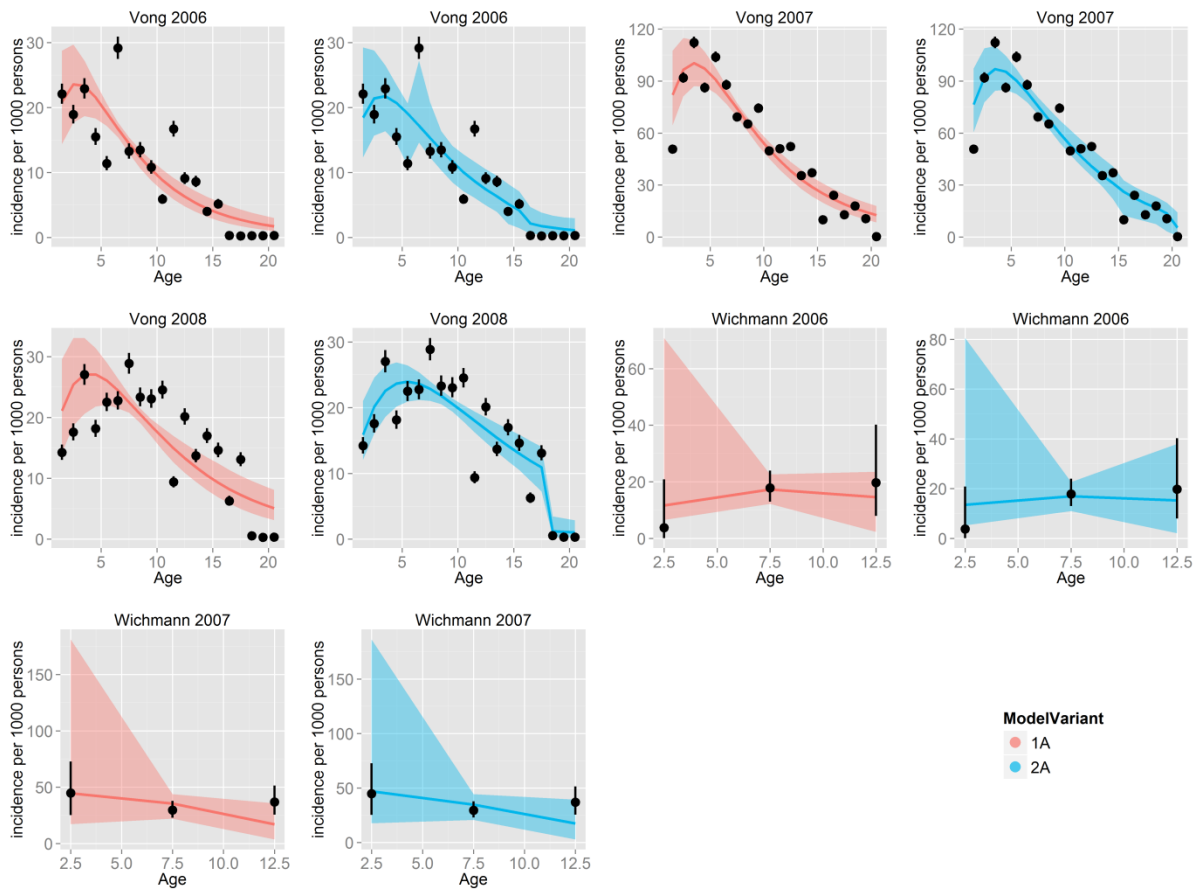

**Fig S12: Model fits of models 1 (single reporting rate) and 2 (age-dependent reporting rate) fitted to cumulative incidence data from Cambodia. 95% exact confidence interval around data points, posterior median (line) and 95% credible interval (shaded area) shown.**

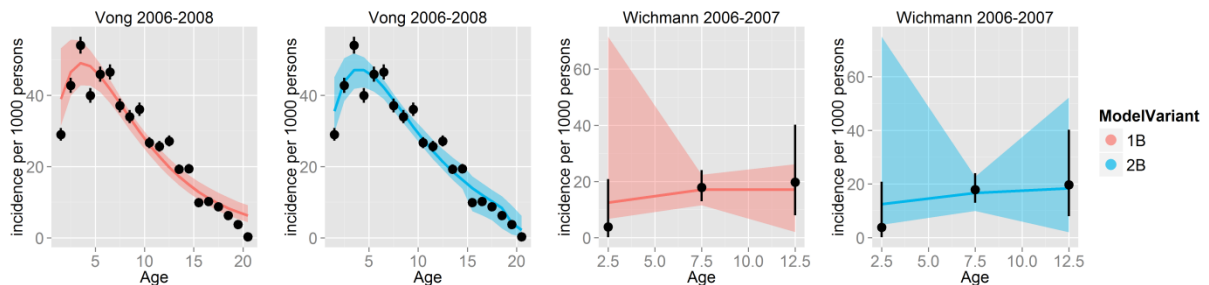

**Fig S13: Model fits of models 1 (single reporting rate) and 2 (age-dependent reporting rate) fitted to cumulative incidence data from China. 95% exact confidence interval around data points, posterior median (line) and 95% credible interval (shaded area) shown.**

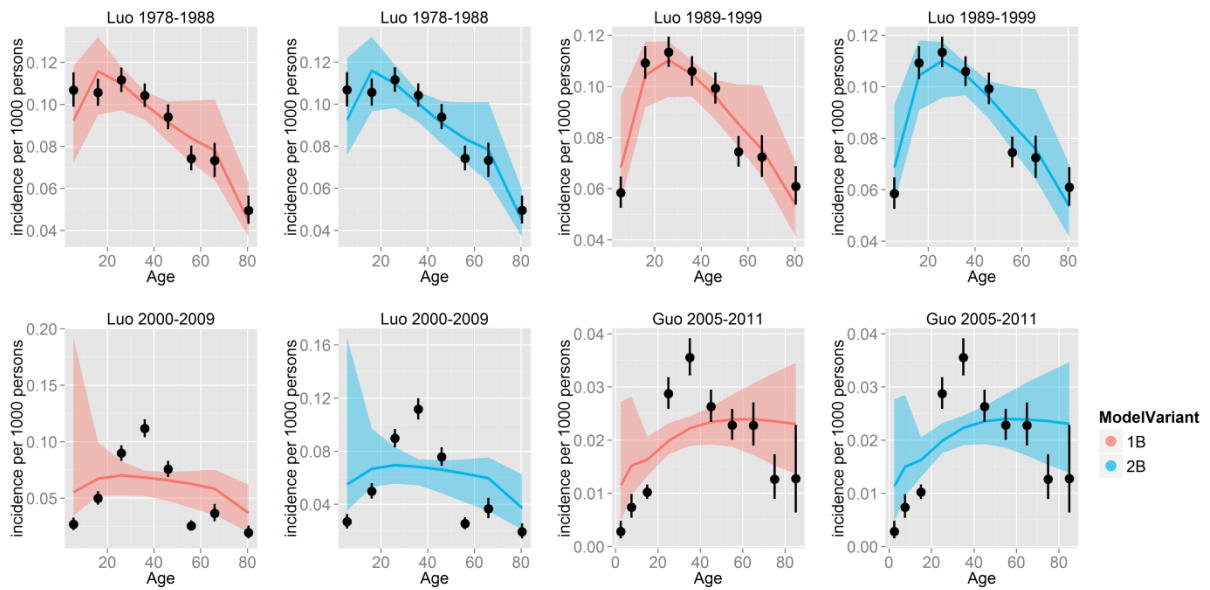

**Fig S14: Model fits of model 1 (single reporting rate) and 2 (age-dependent reporting rate) fitted to yearly incidence data from Laos. 95% exact confidence interval around data points, posterior median (line) and 95% credible interval (shaded area) shown.**

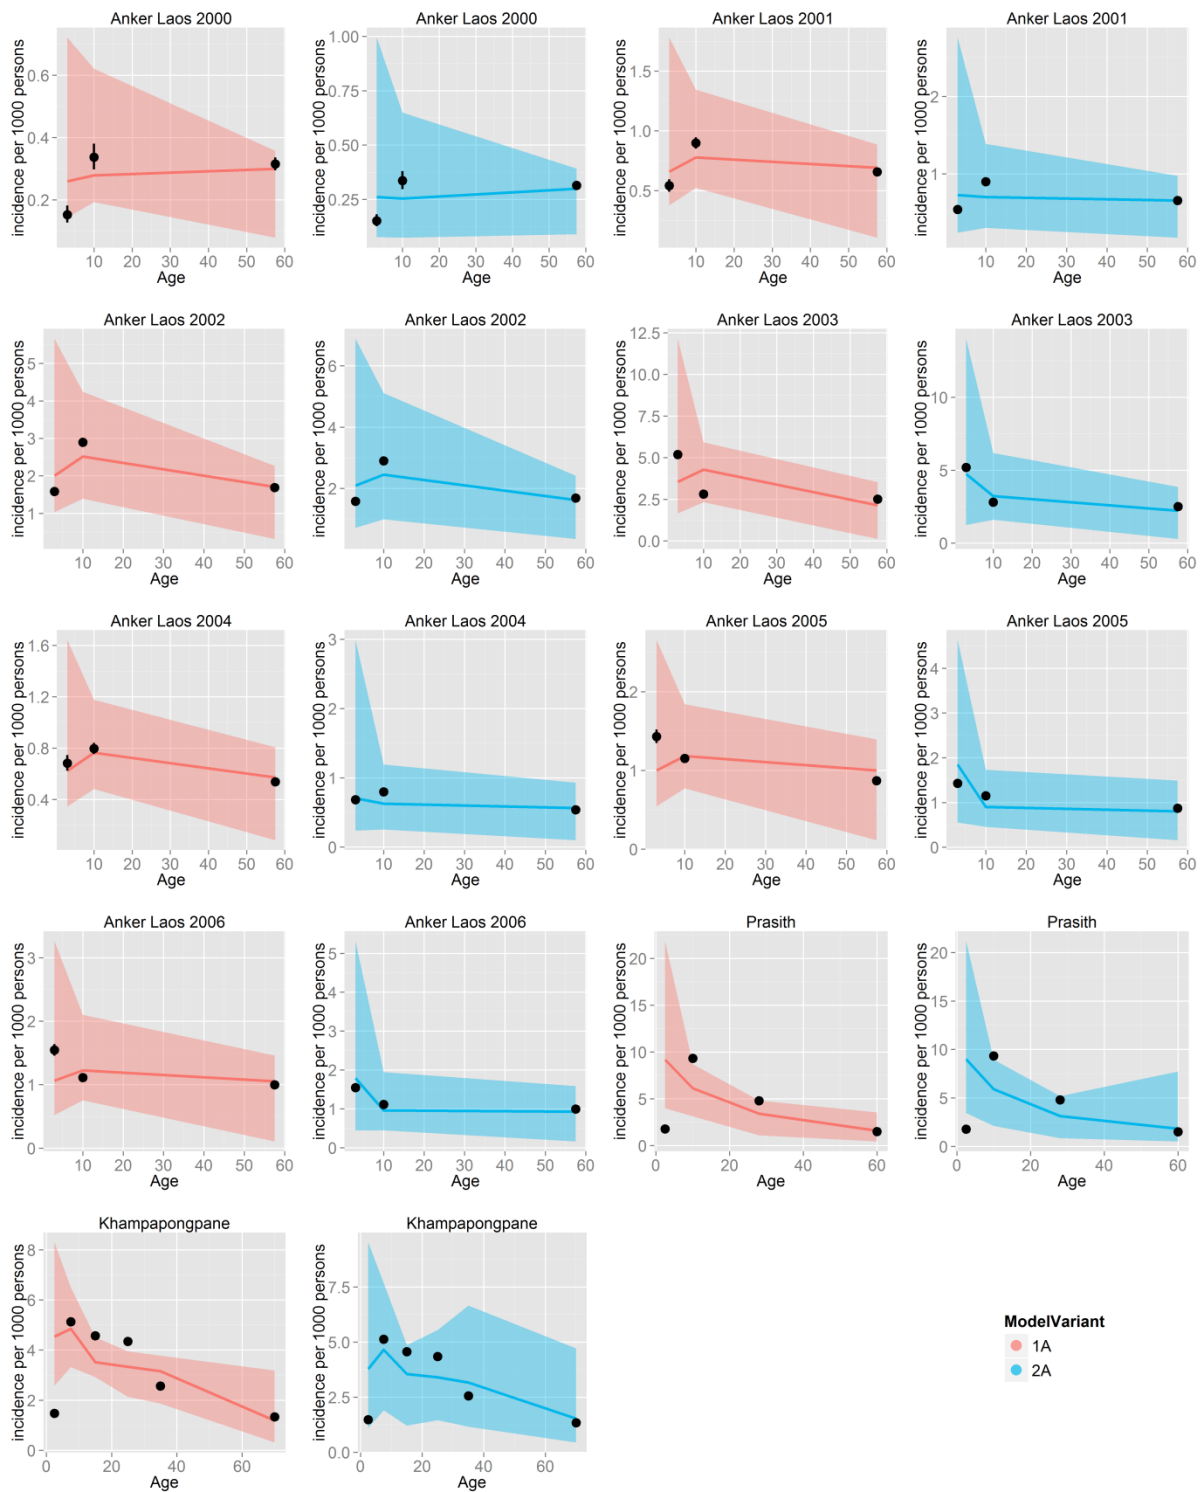

**Fig S15: Model fits of model 1 (single reporting rate) and model 2 (age-dependent reporting rate) fitted to cumulative incidence data from Laos. 95% exact confidence interval around data points, posterior median (line) and 95% credible interval (shaded area) shown.**

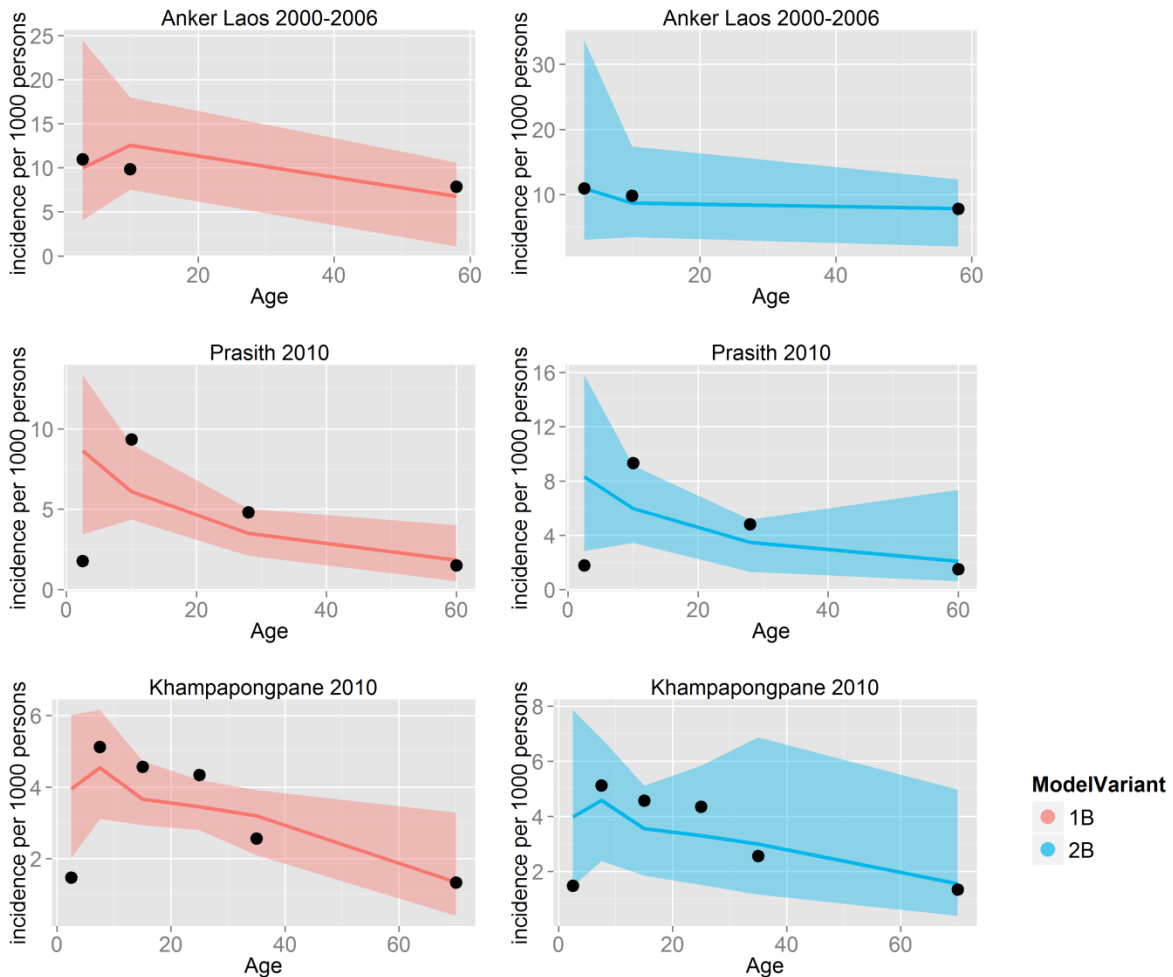

**Fig S16: Model fits of model 1 (single reporting rate) and model 2 (age-dependent reporting rate) fitted to cumulative incidence data from Nicaragua. 95% exact confidence interval around data points, posterior median (line) and 95% credible interval (shaded area) shown.**

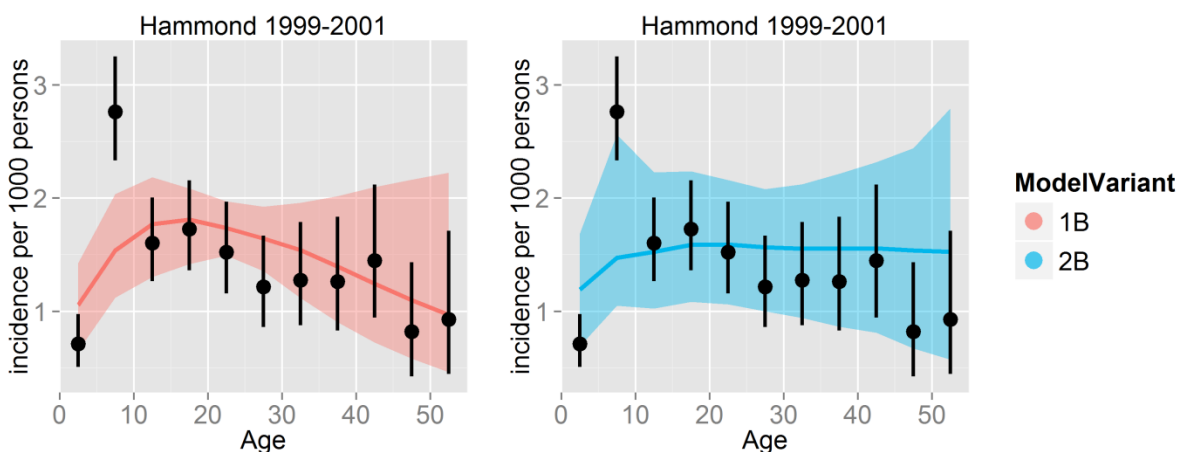



**Fig S17: Model fits of model 1 (single reporting rate) and model 2 (age-dependent reporting rate) fitted to yearly incidence data from the Philippines. 95% exact confidence intervals around data points, posterior median (line) and 95% credible intervals (shaded area) shown.**

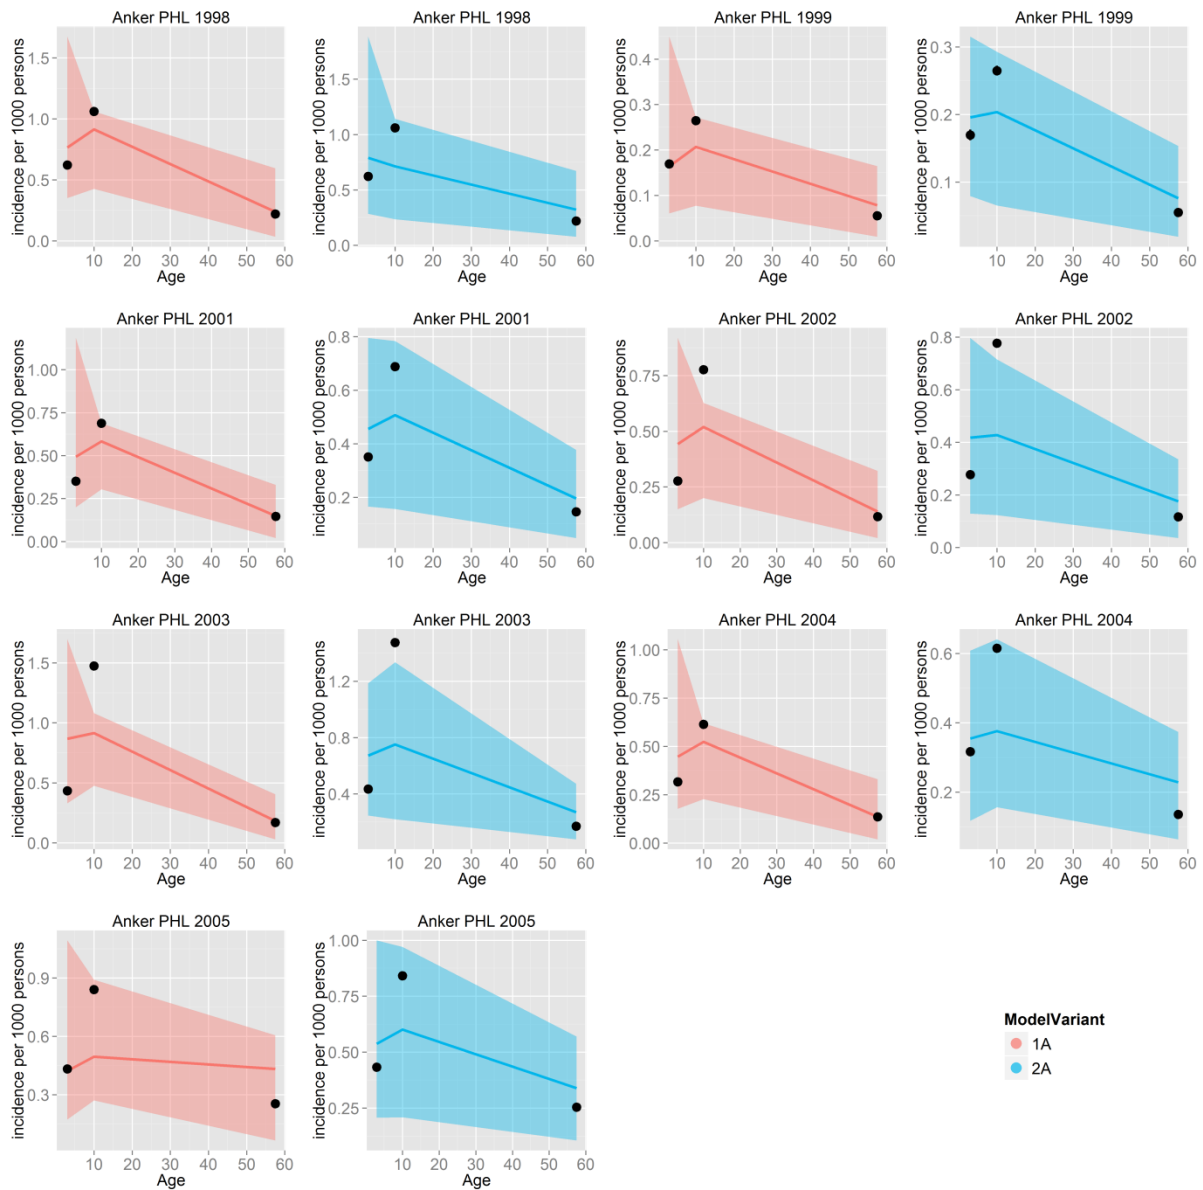

**Fig S18: Model fits of model 1 (single reporting rate) and model 2 (age-dependent reporting rate) fitted to cumulative incidence data from the Philippines. 95% exact confidence intervals around data points, posterior median (line) and 95% credible interval (shaded area) shown.**

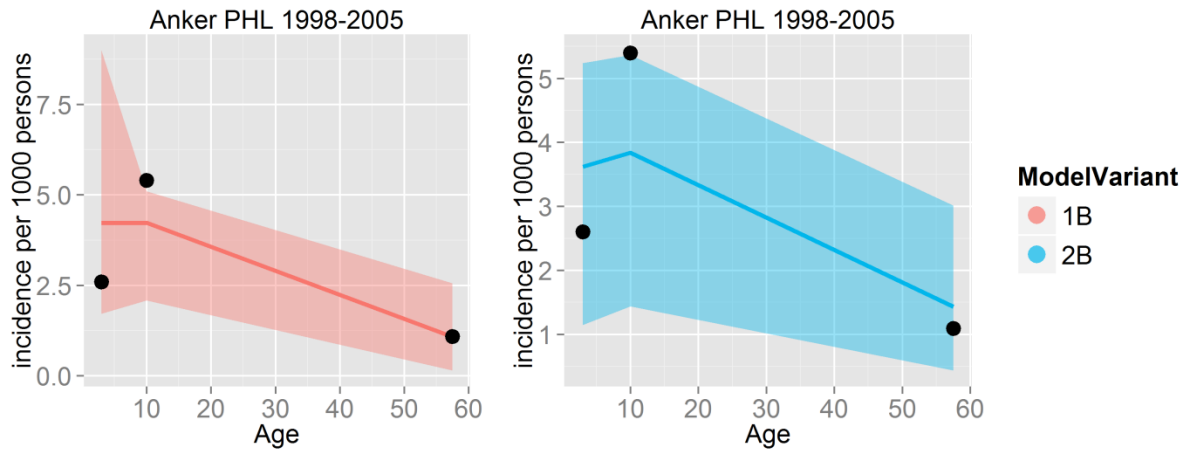

**Fig S19: Model fits of model 1 (single reporting rate) and model 2 (age-dependent reporting rate) fitted to yearly incidence data from Puerto Rico. 95% exact confidence intervals around data points, posterior median (line) and 95% credible intervals (shaded area) shown.**

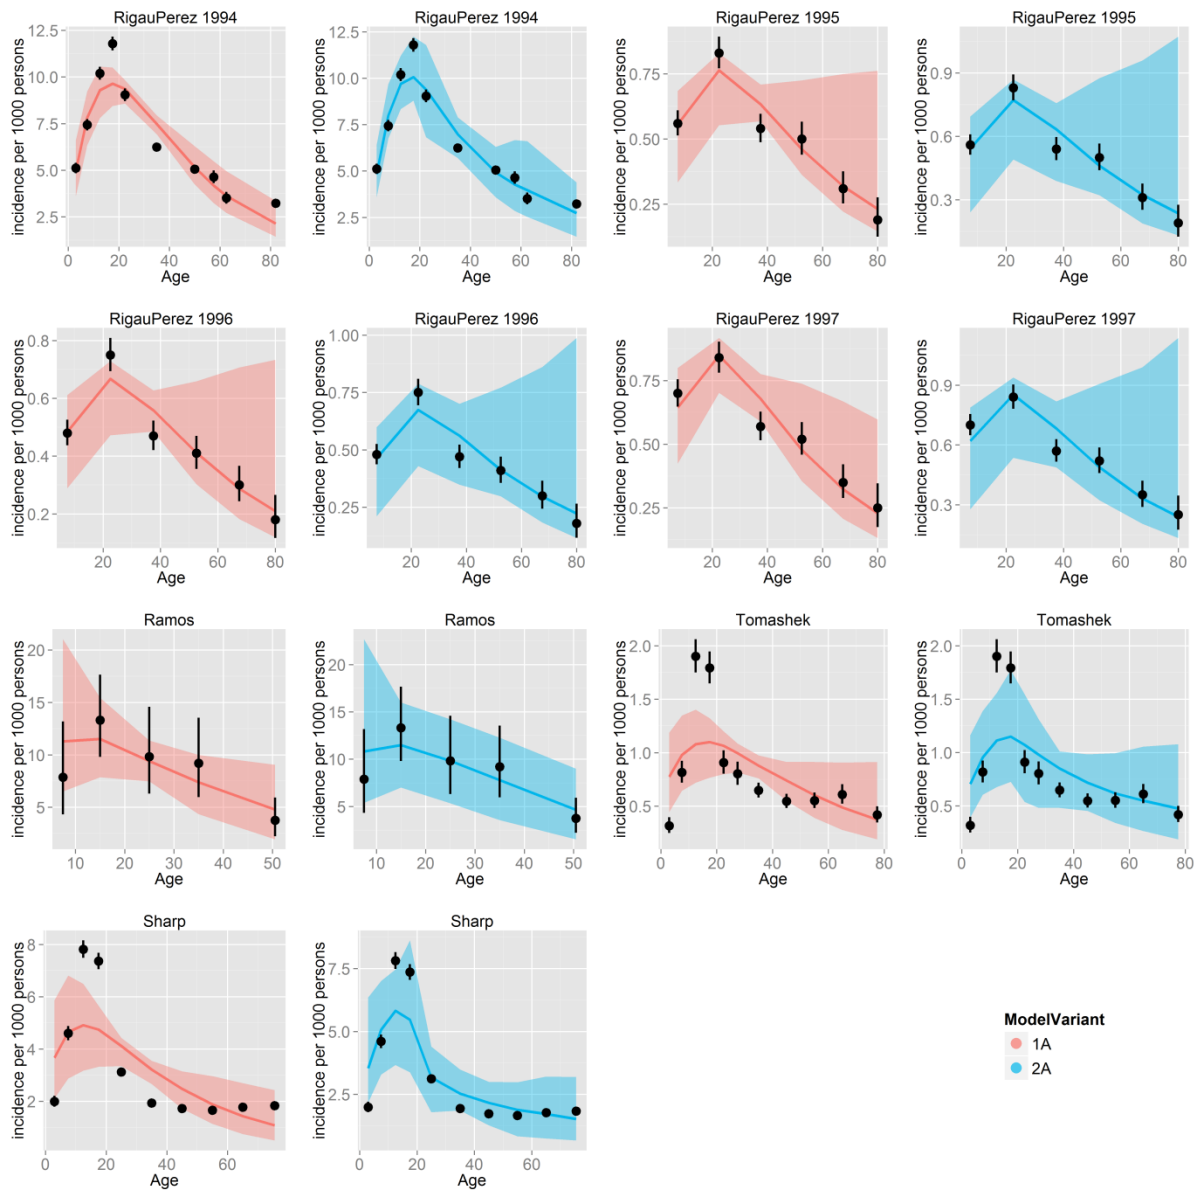

**Fig S20: Model fits of model 1 (single reporting rate) and model 2 (age-dependent reporting rate) fitted to cumulative incidence data from Puerto Rico. 95% exact confidence interval around data point, posterior median (line) and 95% credible interval (shaded area) shown.**

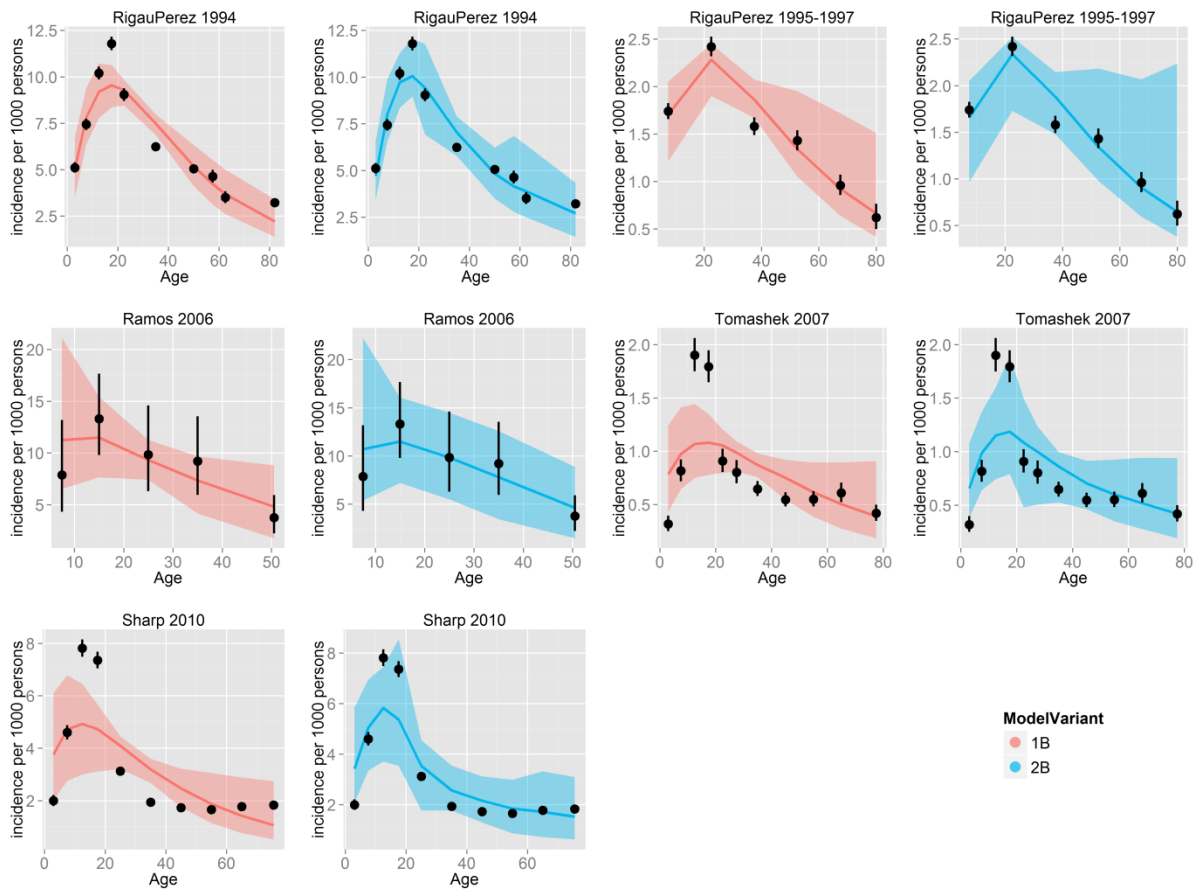

**Fig S21: Model fits of model 1 (single reporting rate) and model 2 (age-dependent reporting rate) fitted to yearly incidence data from Singapore. 95% exact confidence interval around data point, posterior median (line) and 95% credible interval (shaded area) shown.**

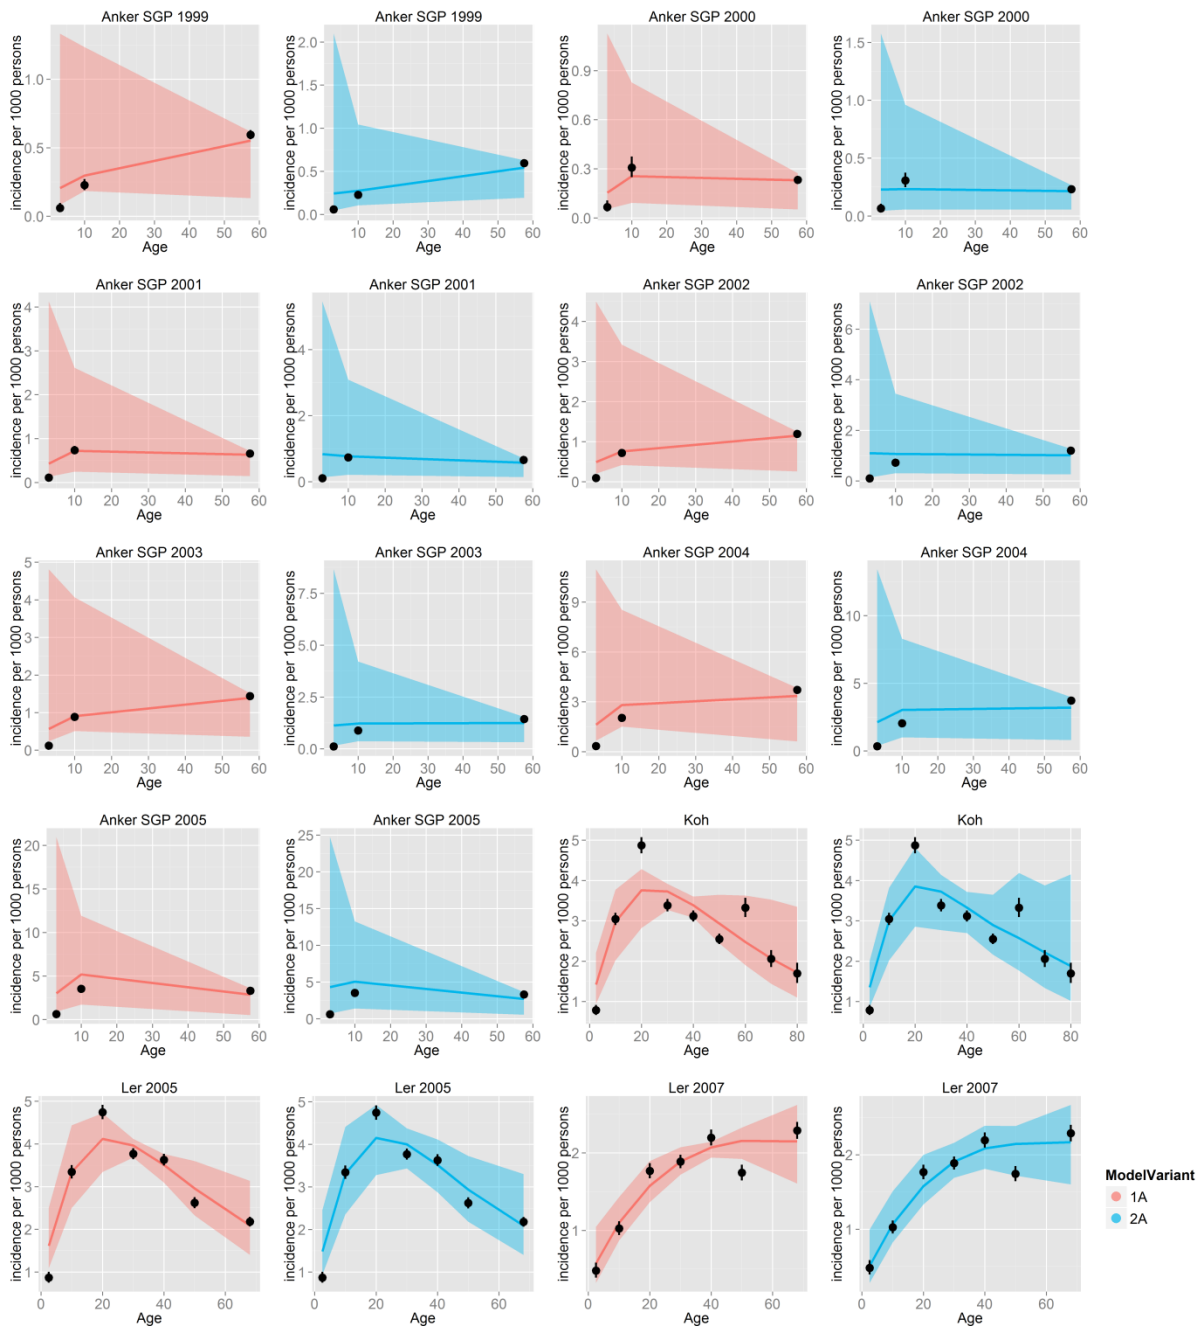

**Fig S22: Model fits of model 1 (single reporting rate) and model 2 (age-dependent reporting rate) fitted to cumulative incidence data from Singapore. 95% exact confidence interval around data points, posterior median (line) and 95% credible interval (shaded area) shown.**

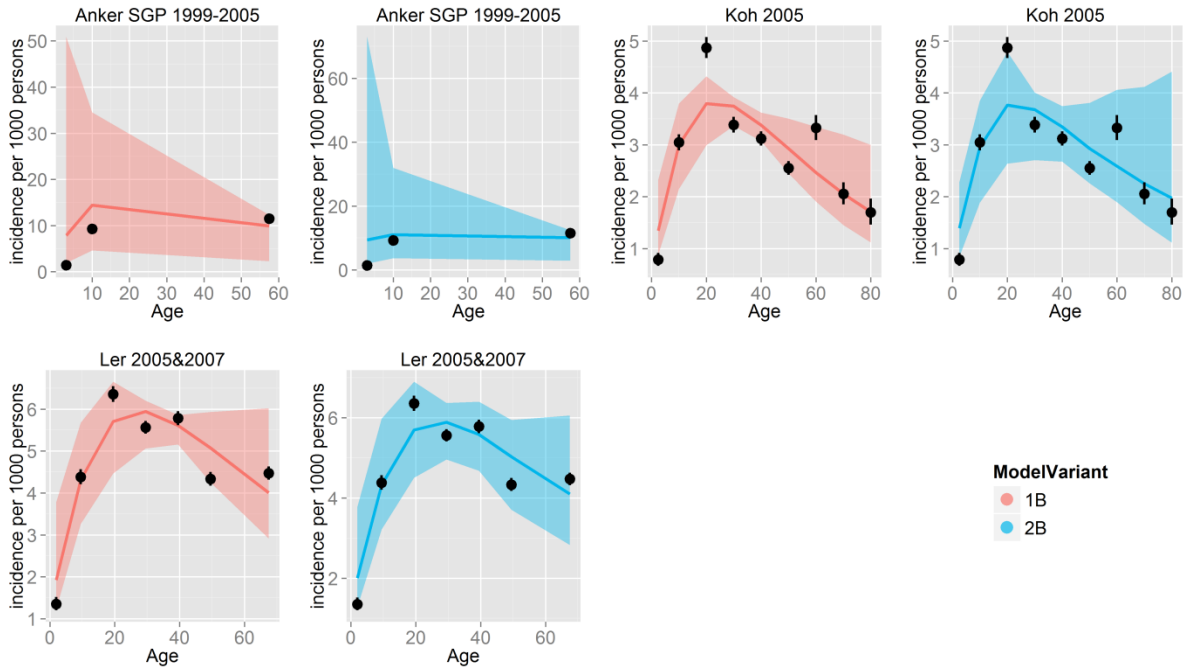

**Fig S23: Model fits of model 1 (single reporting rate) and model 2 (age-dependent reporting rate) fitted to yearly incidence data from Sri Lanka. 95% exact confidence intervals around data points, posterior median (line) and 95% credible interval (shaded area) shown.**

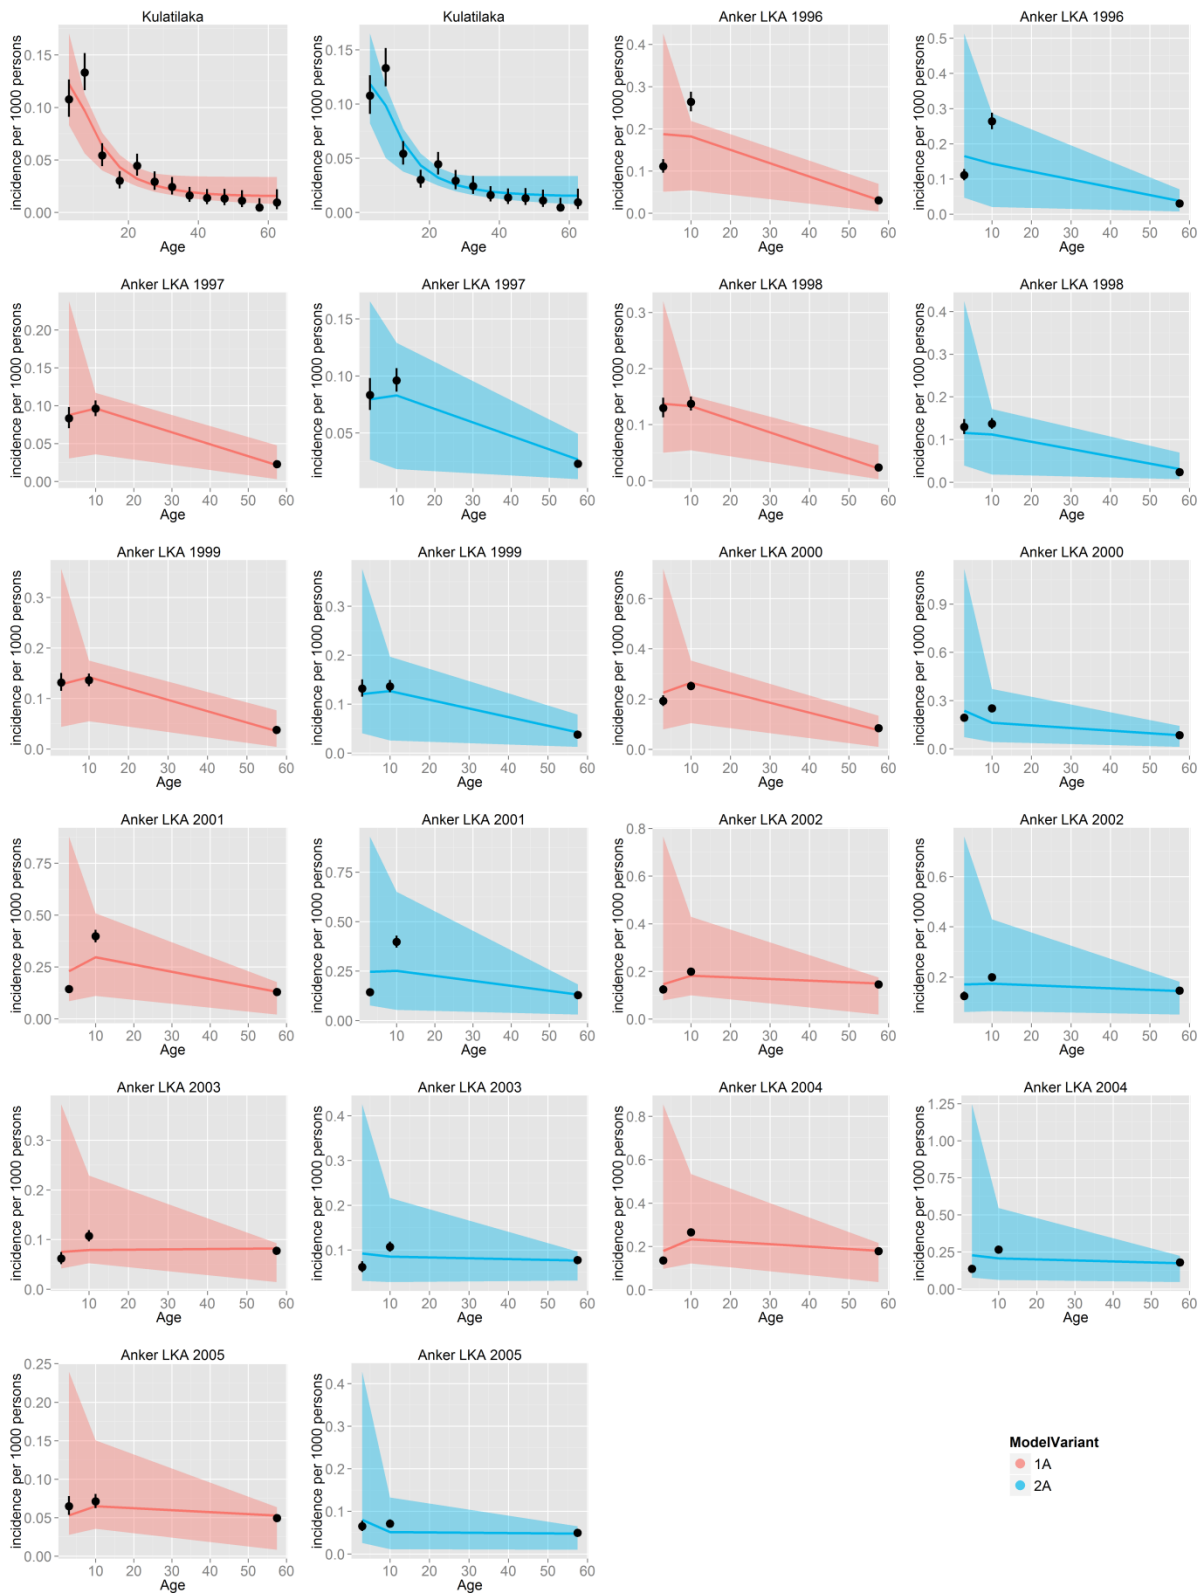

**Fig S24: Model fits from model 1 (single reporting rate) and model 2 (age-dependent reporting rate) fitted to cumulative incidence data from Sri Lanka. 95% exact confidence interval around data points, posterior median (line) and 95% credible interval (shaded area) shown.**

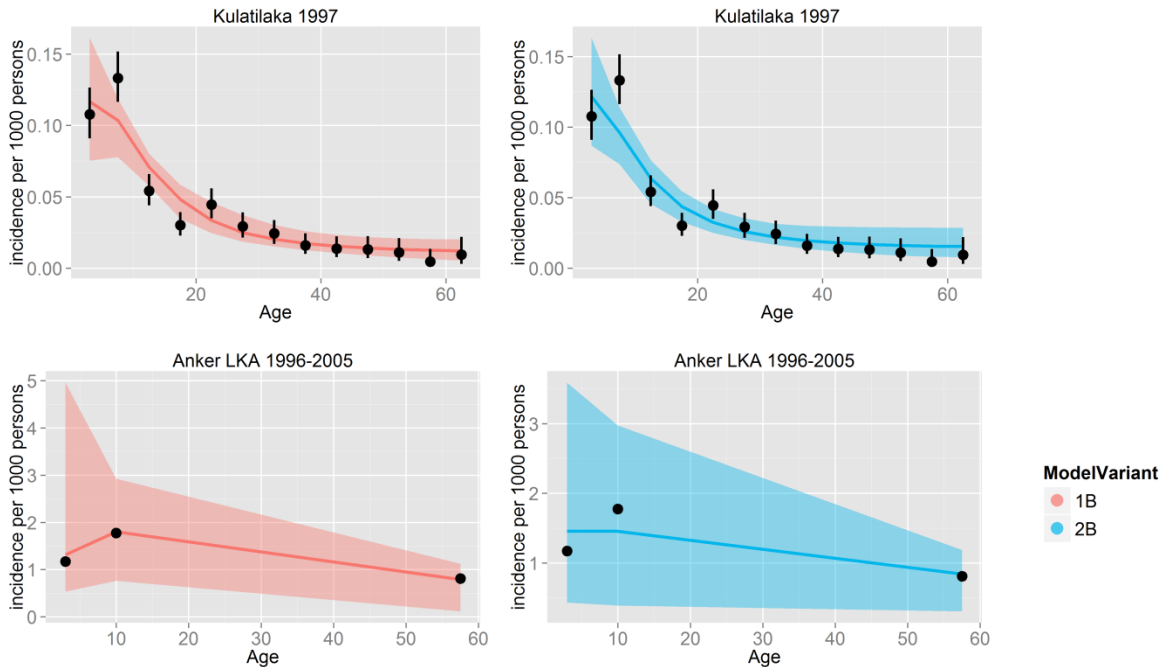

**Fig S25: Model fits from model 1 (single reporting rate) and model 2 (age-dependent reporting rate) fitted to cumulative incidence data from Taiwan. 95% exact confidence intervals around data points, posterior median (line) and 95% credible intervals (shaded area) shown.**

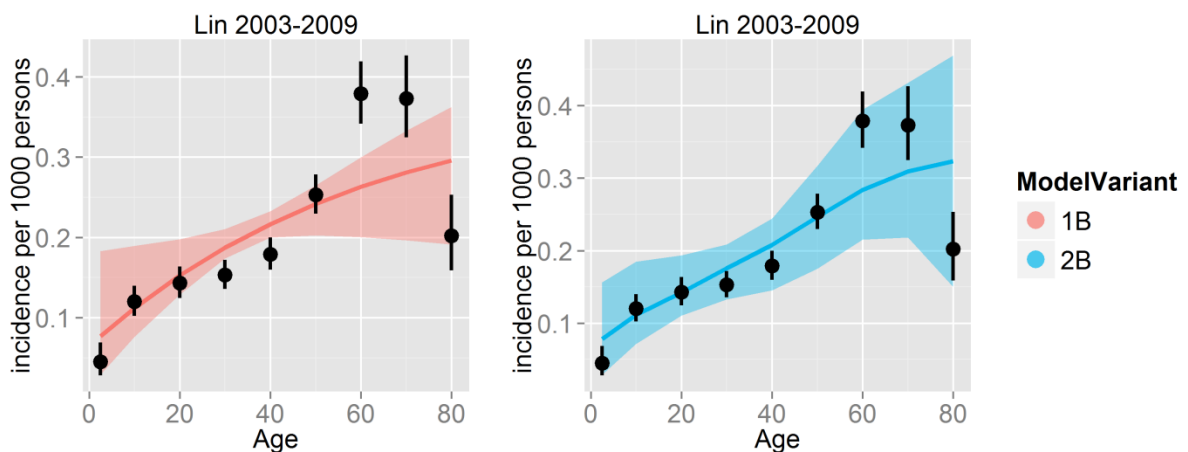



**Fig S26: Model fits from model 1 (single reporting rate) and model 2 (age-dependent reporting rate) fitted to yearly incidence data from Thailand (Limkittikul *et al*). 95% exact confidence intervals around data points, posterior median (line) and 95% credible interval (shaded area) shown.**

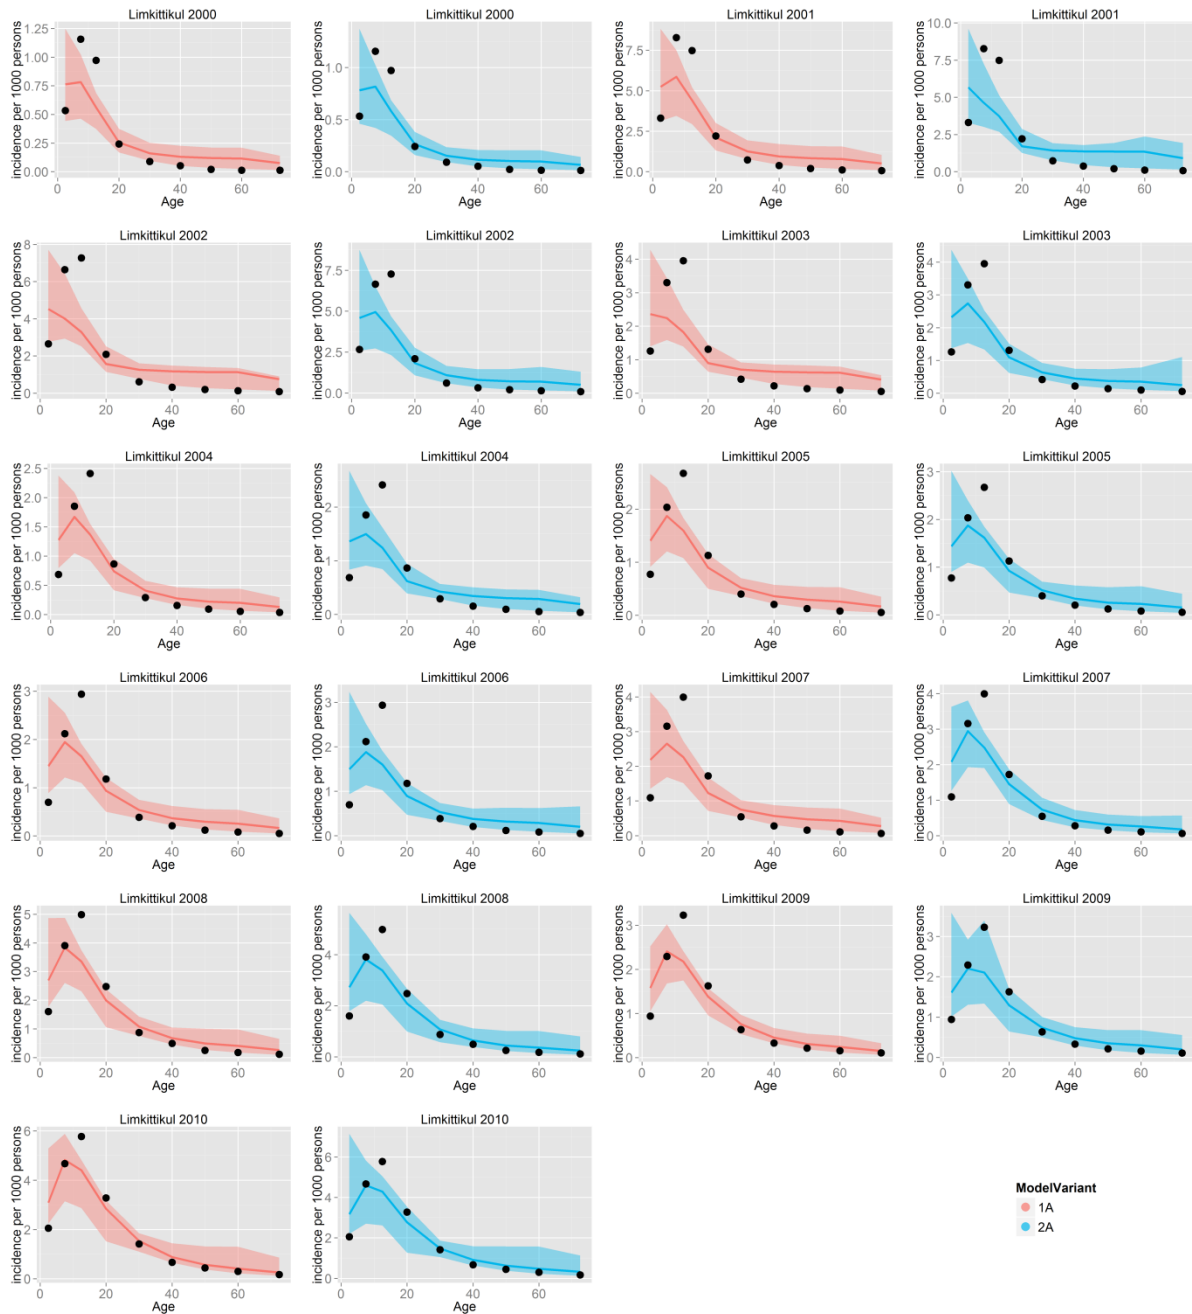

**Fig S27: Model fits from model 1 (single reporting rate) and model 2 (age-dependent reporting rate) fitted to yearly incidence data from Thailand (continued). 95% exact confidence intervals around data points, posterior median (line) and 95% credible interval (shaded area) shown.**

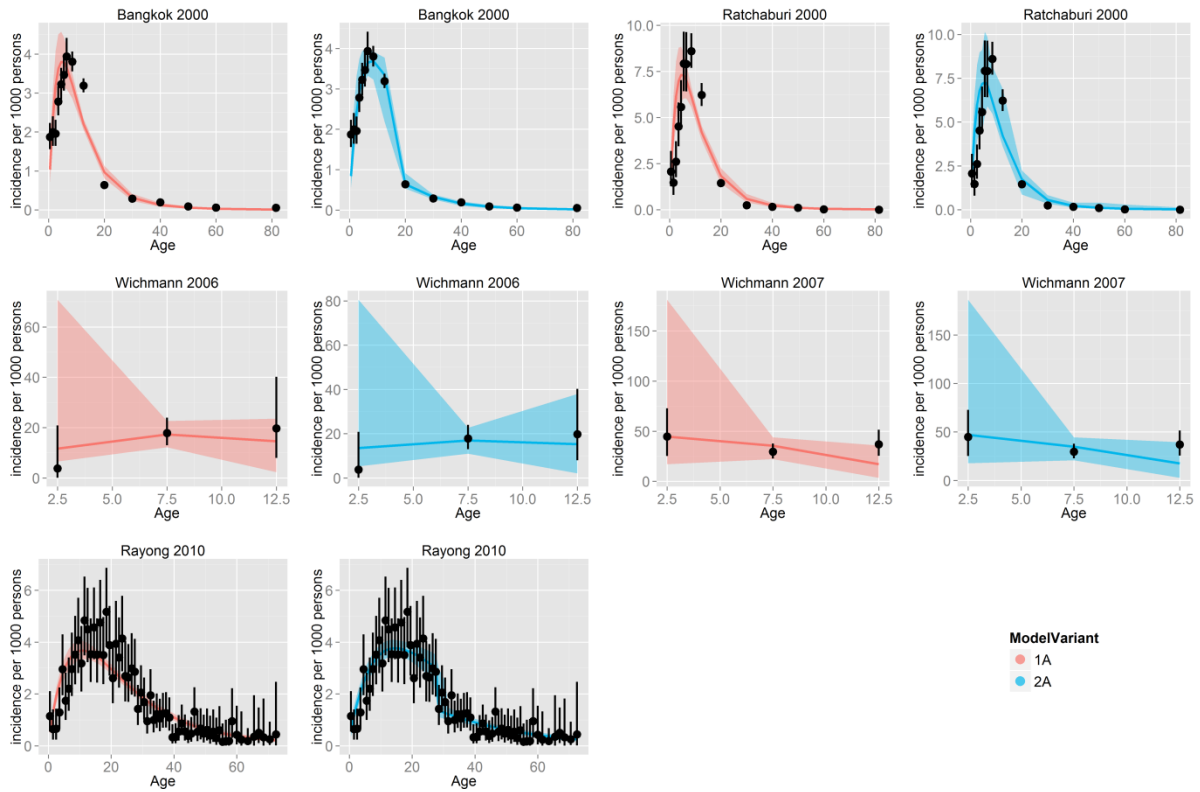

**Fig S28: Model fits from model 1 (single reporting rate) and model 2 (age-dependent reporting rate) fitted to cumulative incidence data from Thailand. 95% exact confidence intervals around data points, posterior median (line) and 95% credible interval (shaded area) shown.**

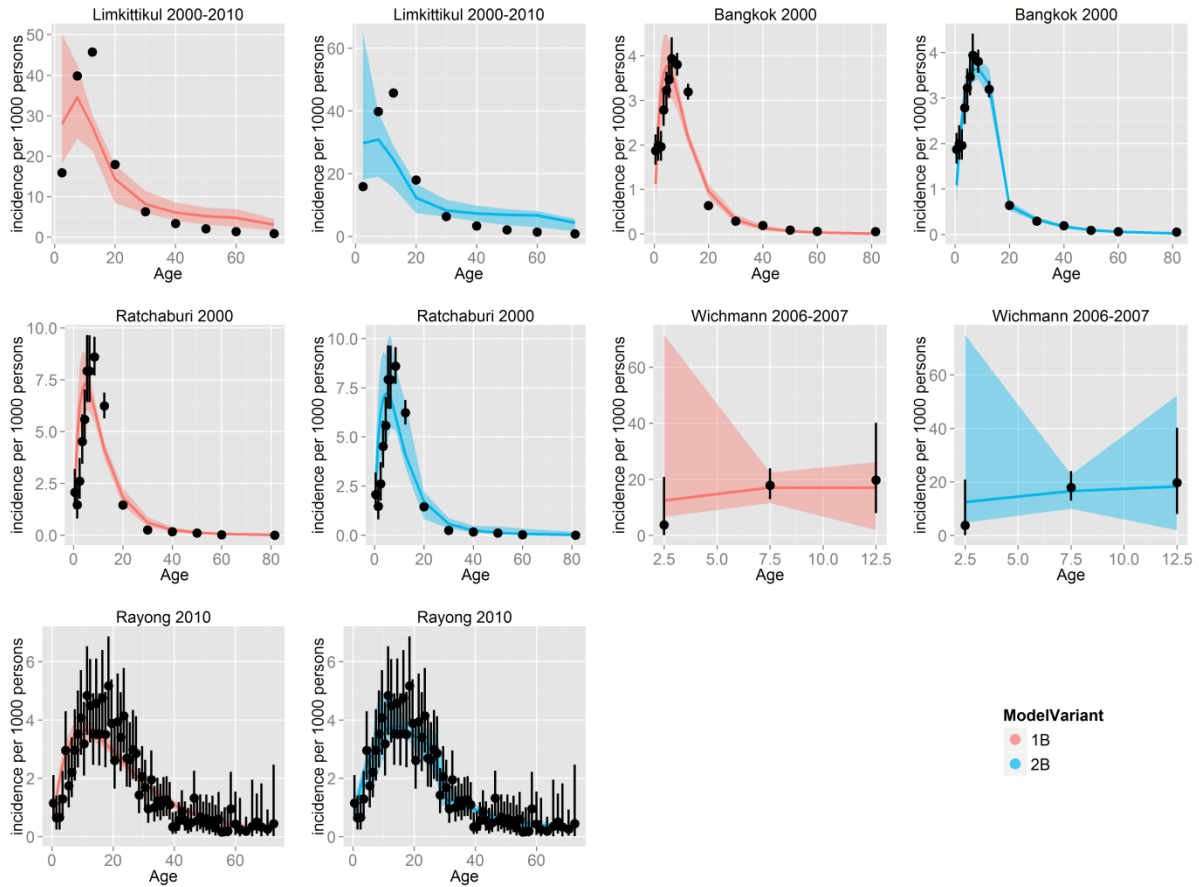

**Fig S29: Model fits from model 1 (single reporting rate) and model 2 (age-dependent reporting rate) fitted to cumulative incidence data from Vietnam. 95% exact confidence intervals around data points, posterior median (line) and 95% credible interval (shaded area) shown.**

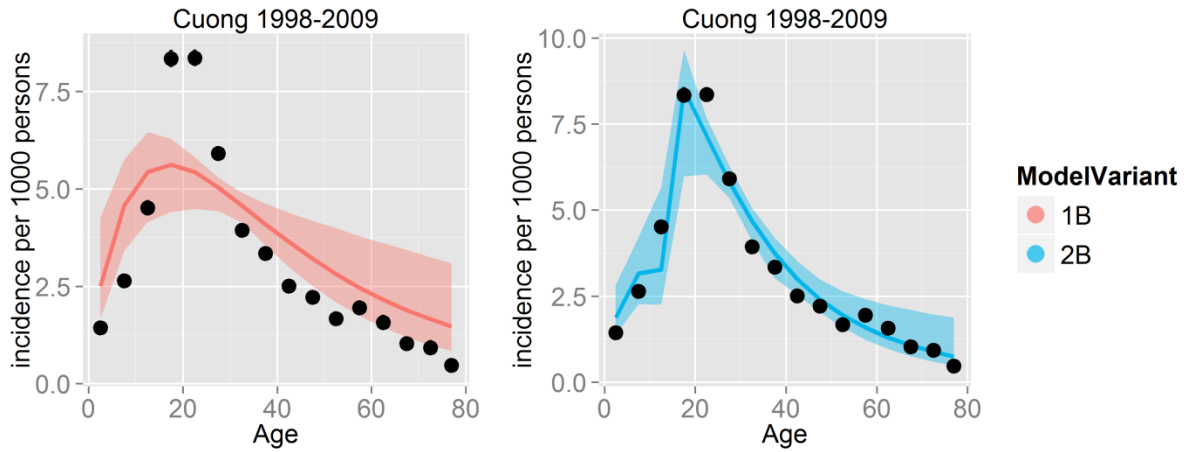

**Fig S30: Model fits from model 1 (single reporting rate) and model 2 (age-dependent reporting rate) fitted to yearly incidence data from Yemen. 95% exact confidence intervals around data points, posterior median (line) and 95% credible interval (shaded area) shown.**

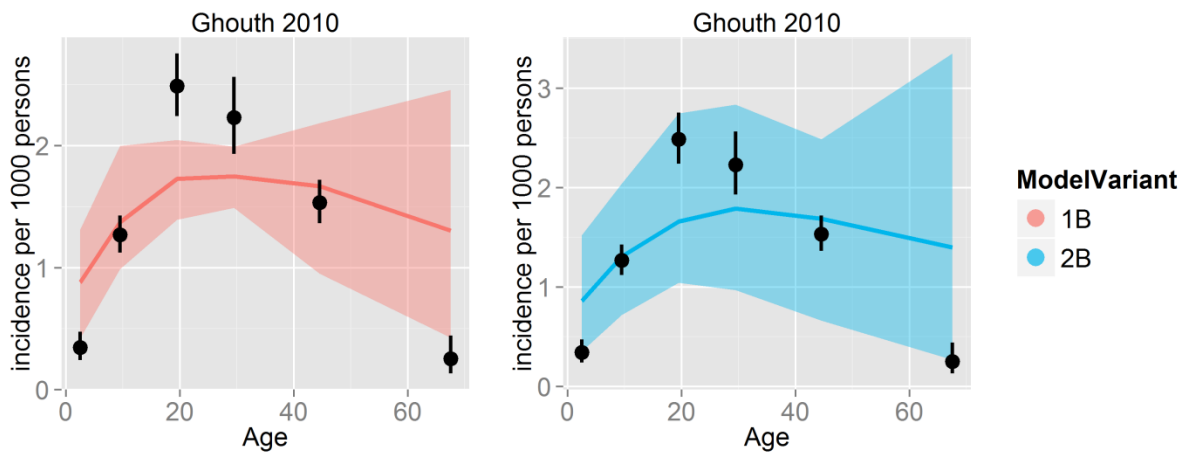

### 3 References

1. Halstead SB. Dengue in the Americas and Southeast Asia: do they differ? *Rev Panam Salud Publica*. 2007/03/08 ed. 2006;20: 407–415.
2. United Nations Population Division D of E and SA. *World Population Prospects: The 2012 Revision*. 2013.
3. Yu P, Shaw C a. An efficient algorithm for accurate computation of the Dirichlet-multinomial log-likelihood function. *Bioinformatics*. 2014;30: 1547–54. doi:10.1093/bioinformatics/btu079
4. Imai N, Dorigatti I, Cauchemez S, Ferguson NM. Estimating Dengue Transmission Intensity from Sero-Prevalence Surveys in Multiple Countries. *PLoS Negl Trop Dis*. 2015;9: e0003719. doi:10.1371/journal.pntd.0003719
5. Ferguson NM, Donnelly CA, Anderson RM. Transmission dynamics and epidemiology of dengue: insights from age-stratified sero-prevalence surveys. *Philos Trans R Soc London Ser B-Biological Sci*. 1999;354: 757–768. doi:10.1098/rstb.1999.0428
6. Fernando P, Vasconcelos C, Lima JWO, Raposo ML, Rodrigues SG, Travassos JFS, et al. Inquérito soro-epidemiológico na Ilha de São Luis durante epidemia de dengue no Maranhão Seroepidemiologic survey in São Luis Island , State of Maranhão , Brazil , during a dengue fever epidemics. 1999;32: 171–179.
7. Silva-Nunes M da, Souza V de. Risk factors for dengue virus infection in rural Amazonia: population-based cross-sectional surveys. *Am J ....* 2008;79: 485–494. Available: <http://www.ajtmh.org/content/79/4/485.short>
8. Lima VVLC de, Rangel O, Andrade VR, Silveira NYJ da, Oliveira SS de, Figueiredo LTM. Dengue: inquérito populacional para pesquisa de anticorpos e vigilância virológica no Município de Campinas, São Paulo, Brasil. *Cad Saude Publica*. 2007;23: 669–680. doi:10.1590/S0102-311X2007000300025
9. Shu PY, Chen LK, Chang SF, Yueh YY, Chow L, Chien LJ, et al. Potential application of nonstructural protein NS1 serotype-specific immunoglobulin G enzyme-linked immunosorbent assay in the seroepidemiologic study of dengue virus infection: Correlation of results with those of the plaque reduction neutralization test. *J Clin Microbiol*. 2002;40: 1840–1844. Available: <http://ovidsp.ovid.com/ovidweb.cgi?T=JS&CSC=Y&NEWS=N&PAGE=fulltext&D=emed5&AN=2002168878>
10. Ripley BD, Thompson M. Regression techniques for the detection of analytical bias. *Analyst*. 1987;112: 377. doi:10.1039/an9871200377
11. Therneau T. deming: Deming, Thiel-Sen and Passing-Bablok Regression [Internet]. 2014. Available: <http://cran.r-project.org/package=deming>
12. Penna G, Pinto LF, Soranz D, Glatt R. High incidence of diseases endemic to the Amazon region of Brazil, 2001-2006. *Emerg Infect Dis*. 2009;15: 626–32. doi:10.3201/eid1504.081329
13. Silva-Nunes M da, Malafronte R dos S, Luz B de A, Souza EA de, Martins LC, Rodrigues SG, et al. The Acre Project: the epidemiology of malaria and arthropod-borne virus infections in a rural Amazonian population. *Cad Saude Publica*. 2006;22: 1325–1334.
14. Cordeiro MTT, Silva AM, Brito C a a, Nascimento EJM, Magalhães MCF, Guimarães

- GF, et al. Characterization of a dengue patient cohort in Recife, Brazil. *Am J Trop Med Hyg.* 2007;77: 1128–1134. Available: <Go to ISI>://WOS:000252123200026
15. Braga C, Luna CF, Martelli CM, de Souza W V, Cordeiro MT, Alexander N, et al. Seroprevalence and risk factors for dengue infection in socio-economically distinct areas of Recife, Brazil. *Acta Trop.* 2010;113: 234–240. doi:10.1016/j.actatropica.2009.10.021
  16. Cardoso IM, Areias Cabidelle A de S, Borges P de CELP de C e L, Lang CF, Calenti FGFG, Nogueira L de O, et al. Dengue: clinical forms and risk groups in a high incidence city in the Southeastern region of Brazil. *Rev Soc Bras Med Trop.* 2011;44: 430–435. doi:10.1590/S0037-86822011005000044
  17. de Lima VLC, Figueiredo LTM, Correa HR, Leite OF, Rangel O, Vido AA, et al. Dengue fever: a post-epidemic sero-epidemiological survey in an urban setting at a northwestern county of S. Paulo State - Brazil. *Rev Saude Publica.* 1999;33: 566–574.
  18. Anker M, Arima Y. Male–female differences in the number of reported incident dengue fever cases in six Asian countries. *West Pacific Surveill Response* .... 2011;2: 1–7. doi:10.5365/wpsar.2011.2.1.002
  19. Vallee J, Dubot-Peres A, Ounaphom P, Sayavong C, Bryant JE, Gonzalez J-P, et al. Spatial distribution and risk factors of dengue and Japanese encephalitis virus infection in urban settings: The case of Vientiane, Lao PDR. *Trop Med Int Heal.* 2009;14: 1134–1142. doi:http://dx.doi.org/10.1111/j.1365-3156.2009.02319.x
  20. Hammond SN, Balmaseda A, Perez L, Tellez Y, Saborio SI, Mercado JC, et al. Differences in dengue severity in infants, children, and adults in a 3-year hospital-based study in Nicaragua. *Am J Trop Med Hyg.* 2005;73: 1063–1070.
  21. Balmaseda A, Standish K, Mercado JC, Matute JC, Tellez Y, Saborio S, et al. Trends in patterns of dengue transmission over 4 years in a pediatric cohort study in Nicaragua. *J Infect Dis.* 2010;201: 5–14. doi:10.1086/648592
  22. Yew YW, Ye T, Ang LW, Ng LC, Yap G, James L, et al. Seroepidemiology of dengue virus infection among adults in Singapore. *Ann Acad Med Singapore.* 2009;38: 667–675. Available: <Go to ISI>://WOS:000269938400002
  23. Ler TS, Ang LW, Yap GSL, Ng LC, Tai JC, Jamesb L, et al. WPRO | Epidemiological characteristics of the 2005 and 2007 dengue epidemics in Singapore – similarities and distinctions. *West Pacific Surveill Response J. WPRO | WHO Western Pacific Region;* 2011;2: 24–29. Available: [http://www.wpro.who.int/wpsar/volumes/02/2/2011\\_OR\\_Ler\\_etal/en/](http://www.wpro.who.int/wpsar/volumes/02/2/2011_OR_Ler_etal/en/)
  24. Yap G, Li C, Mutalib A, Lai Y-L, Ng L-C. High rates of inapparent dengue in older adults in Singapore. *Am J Trop Med Hyg.* 2013;88: 1065–9. doi:10.4269/ajtmh.12-0150
  25. Lin C-H, Schiøler KL, Jepsen MR, Ho C-K, Li S-H, Konradsen F. Dengue outbreaks in high-income area, Kaohsiung City, Taiwan, 2003-2009. *Emerg Infect Dis.* 2012;18: 1603–11. doi:10.3201/eid1810.111929
  26. Bureau of Epidemiology, Ministry of Public Health of Thailand. Bureau of Epidemiology, Ministry of Public Health of Thailand (YEAR) Annual epidemiological surveillance report. Nonthaburi, Thailand.
  27. Perret C, Chanthavanich P, Pengsaa K, Limkittikul K, Hutajaroen P, Bunn JE, et al.

- Dengue infection during pregnancy and transplacental antibody transfer in Thai mothers. *J Infect.* 2005;51: 287–293. doi:10.1016/j.jinf.2004.10.003
28. Tuntaprasart W, Barbazan P, Nitatpattana N, Rongsriyam Y, Yoksan S, Gonzalez JP. Seroepidemiological survey among schoolchildren during the 2000-2001 dengue outbreak of Ratchaburi Province, Thailand. *Southeast Asian J Trop Med Public Health.* 2003;34: 564–568. Available: <Go to ISI>://BCI:BCI200400103433
  29. Rodriguez-Barraquer I, Cordeiro MT, Braga C, de Souza W V, Marques ET, Cummings DAT. From re-emergence to hyperendemicity: the natural history of the dengue epidemic in Brazil. *PLoS Negl Trop Dis.* 2011;5: e935. doi:10.1371/journal.pntd.0000935
  30. Cuong HQ, Hien NT, Duong TN, Phong T V, Cam NN, Farrar J, et al. Quantifying the Emergence of Dengue in Hanoi, Vietnam: 1998-2009. *PLoS Negl Trop Dis.* 2011;5: e1322–e1322. doi:10.1371/journal.pntd.0001322
  31. Bartley LM, Carabin H, Vinh Chau N, Ho V, Luxemburger C, Hien TT, et al. Assessment of the factors associated with flavivirus seroprevalence in a population in Southern Vietnam. *Epidemiol Infect.* 2002;128: 213–220. doi:10.1017/s0950268801006495
  32. Cordeiro MTT, Schatzmayr HGG, Nogueira RMR, De Oliveira VF, De Melo WT, de Carvalho EF. Dengue and dengue hemorrhagic fever in the State of Pernambuco, 1995-2006. *Rev Soc Bras Med Trop.* 2007;40: 605–611. doi:10.1590/s0037-86822007000600001
  33. Vong S, Khieu V, Glass O, Ly S, Duong V, Huy R, et al. Dengue incidence in urban and rural Cambodia: results from population-based active fever surveillance, 2006-2008. *PLoS Negl Trop Dis.* 2010;4: e903. doi:10.1371/journal.pntd.0000903
  34. Wichmann O, Yoon I-K, Vong S, Limkittikul K, Gibbons R V, Mammen MP, et al. Dengue in Thailand and Cambodia: an assessment of the degree of underrecognized disease burden based on reported cases. *PLoS Negl Trop Dis.* 2011;5: e996. doi:10.1371/journal.pntd.0000996
  35. Rigau-Pérez JG, Ayala-López A, Vorndam AV, Clark GG, Rigau-Perez JG, Ayala-Lopez A, et al. Dengue activity in Puerto Rico during an interepidemic period (1995-1997). *Am J Trop Med Hyg.* 2001;64: 75–83. Available: <Go to ISI>://BCI:BCI200200235758
  36. Ramos MM, Argueello DF, Luxemburger C, Quinones L, Munoz JL, Beatty M, et al. Epidemiological and clinical observations on patients with dengue in Puerto Rico: Results from the first year of enhanced surveillance - June 2005-May 2006. *Am J Trop Med Hyg.* 2008;79: 123–127. Available: <Go to ISI>://WOS:000257407700022
  37. Sharp TM, Hunsperger E, Santiago GA, Munoz-Jordan JL, Santiago LM, Rivera A, et al. Virus-specific differences in rates of disease during the 2010 Dengue epidemic in Puerto Rico. *PLoS Negl Trop Dis.* 2013/04/18 ed. 2013;7: e2159. doi:10.1371/journal.pntd.0002159
  38. Tomashek KM, Rivera A, Munoz-Jordan JL, Hunsperger E, Santiago L, Padro O, et al. Description of a Large Island-Wide Outbreak of Dengue in Puerto Rico, 2007. *Am J Trop Med Hyg.* 2009;81: 467–474.
  39. Koh BKW, Lee CN, Kita Y, Choon ST, Li WA, Kit YW, et al. The 2005 dengue epidemic in Singapore: Epidemiology, prevention and control. *Ann Acad Med*

Singapore. 2008;37: 538–545. Available:  
<http://ovidsp.ovid.com/ovidweb.cgi?T=JS&CSC=Y&NEWS=N&PAGE=fulltext&D=emed8&AN=2008387646>

40. Kulatilaka TA, Jayakuru WS. Control of dengue/dengue haemorrhagic fever in Sri Lanka. *Dengue Bull.* 1998;22: 53–59. Available: <Go to ISI>://CABI:20000508522
41. Limkittikul K, Brett J, L’Azou M. Epidemiological Trends of Dengue Disease in Thailand (2000–2011): A Systematic Literature Review. *PLoS Negl Trop Dis.* 2014;8: e3241. doi:10.1371/journal.pntd.0003241
42. Ghouth AS, Amarasinghe A, Letson GW, Bin Ghouth AS. Dengue outbreak in Hadramout, Yemen, 2010: an epidemiological perspective. *Am J Trop Med Hyg.* 2012;86: 1072–1076. doi:10.4269/ajtmh.2012.11-0723
43. Khampapongpane B, Lewis HC, Ketmayoon P, Phonekeo D, Somoulay V, Khamsing A, et al. National dengue surveillance in the Lao People’s Democratic Republic, 2006–2012: epidemiological and laboratory findings. *West Pacific Surveill Response J.* 2014;5: 2006–2012. doi:10.5365/wpsar.2014.5.1.001
44. Prasith N, Keosavanh O, Phengxay M. Assessment of gender distribution in dengue surveillance data, the Lao People’s Democratic Republic. *West Pacific Surveill Response J.* 2011;4: 1–9. doi:10.5365/wpsar.2012.3.4.020
45. Luo L, Liang H, Hu Y, Liu W, Wang Y, Jing Q, et al. Epidemiological, virological, and entomological characteristics of dengue from 1978 to 2009 in Guangzhou, China. *J Vector Ecol.* 2012;37: 230–240. doi:10.1111/j.1948-7134.2012.00221.x
46. Guo R, Lin J, Li L-H, Ke C-W, He J, Zhong H, et al. The Prevalence and Endemic Nature of Dengue Infections in Guangdong, South China: An Epidemiological, Serological, and Etiological Study from 2005-2011. *PLoS One.* 2014;9: e85596. doi:10.1371/journal.pone.0085596
